# Supplementary material for: ARKA: a framework of dimensionality reduction for machine-learning classification modeling, risk assessment, and data gap-filling of sparse environmental toxicity data
Source: Royal Society of Chemistry journal article supplement (doi:10.1039/d4em00173g), 2024-01-01
Supplement: d4em00173g1.xlsx [file d4em00173g1.xlsx]

## Sheet: Banerjee and Roy
									ARKA: A framework of dimensionality reduction
									for machine-learning classification modeling, risk
													assessment, and data gap-filling of sparse environmental toxicity data
												Arkaprava Banerjee, Kunal Roy*
												Drug Theoretics and Cheminformatics Laboratory, Department of Pharmaceutical Technology, Jadavpur University, Kolkata 700 032, India
												*Correspondence to: Kunal Roy (kunal.roy@jadavpuruniversity.in)
										Supplementary Materials SI-1

## Sheet: Dataset 1
No.	Name	nR05	Eta_B	C-040	minsssCH	gmin	MaxaaN	gmax	B03[O-O]	B04[N-O]	B05[N-O]	B06[C-N]	B09[C-C]	B10[C-O]	SAscore	Activity	Set
1	(16-b)-21-(Acetyloxy)-17-hydroxy-16-methylpregna-1,4,9(11)-triene-3,20-dione	1	1.22162	1	-0.206918	-1.50939	0	13.0236	1	0	0	0	1	1	4.57645	0	TRAIN
3	(2E)-2-Methyl-2-butenal	0	0.10594	0	0	0.787037	0	9.66759	0	0	0	0	0	0	3.21636	0	TRAIN
5	(4Z)-2-Methyl-6-methylene-4-octene	0	0.250098	0	0.764728	0.764728	0	3.88322	0	0	0	0	0	0	3.06527	0	TRAIN
7	[4-(Ethoxymethyl)-2,6-dimethoxyphenyl]boronic acid	0	0.366241	0	0	-1.63792	0	9.27886	0	0	0	0	0	0	3.56744	0	TRAIN
9	3-[(2R)-3-[[2-(2,3-Dihydro-1H-inden-2-yl)-1,1-dimethyl-ethyl]amino]-2-hydroxypropoxy]-4,5-difluoro-benzene propanoic acid	1	1.04617	1	-0.916493	-1.14781	0	14.0323	1	1	0	1	1	1	3.99527	0	TRAIN
11	1-(3',4',5'-Tetramethoxy-phenyl)-4,4-dimethylpentane-1,3-dione	0	0.761069	0	0	-0.545334	0	12.2649	1	0	0	0	1	0	3.3473	0	TRAIN
13	1-(tert-Butoxycarbonyl)-4-fluoro-L-prolinamide	1	0.795804	1	-1.21758	-1.21758	0	13.1201	0	0	1	1	0	0	3.79696	0	TRAIN
15	1,1-Dimethylethyl[(1s)-2-[4-[(2-methyl-4-thiazolyl)methoxy]phenyl]-1-(2s)-oxiranylethyl]-carbamate	1	0.890192	0	-0.106852	-0.519961	4.3894	12.0533	0	0	0	1	1	1	4.31938	0	TRAIN
17	1,2,3,5,6,7-Hexahydro-2-thioxo-4h-cyclopentapyrimi-din-4-one	1	0.315143	1	0	-0.0127315	0	11.1897	0	1	0	0	0	0	3.6282	0	TRAIN
19	1,5-Dimethyl-4-phenyl-2-imidazolidinone	1	0.387623	0	0.119167	0.00588246	0	11.383	0	0	0	1	0	0	4.09821	0	TRAIN
21	1-[2-Amino-3,3-bis(4-fluorophenyl)-1-oxopropyl]-4-fluoro-2-pyrrolidine carbonitrile	1	0.770914	2	-1.27695	-1.27695	0	13.7012	0	0	1	1	1	0	4.55816	0	TRAIN
23	1-[3-(Cyclopentyloxy)-4-methoxy-phenyl]-4-oxocyclohexane carbonitrile	1	0.507036	1	0.240851	-0.575429	0	11.5415	1	0	0	1	1	1	3.62191	0	TRAIN
25	1-[5-[(4-Fluorophenyl)methyl]-2-furanyl]ethanone	1	0.438133	0	0	-0.256833	0	12.6673	1	0	0	0	1	0	3.56442	0	TRAIN
27	2-(4-Ethoxyphenyl)-3-[4-(methylsulfonyl)phenyl]pyrazolo[1,5-b]pyridazine	1	0.788324	0	0	-3.25052	4.65263	11.7783	0	0	0	1	1	1	4.22112	0	TRAIN
29	2-(Benzyl)tert- butyl)amino)-1-(alpha,4-dihydroxy-m-tolyl)ethane	0	0.77812	0	-0.695521	-0.695521	0	10.6382	0	0	0	1	1	1	3.89552	0	TRAIN
31	2,3,4,5-Tetrahydro-N-(1-methylethyl)-2,4-dioxo-N,5-diphenyl-3-[(phenylmethoxy)-imino]-1H-1,5-benzodiazepine-1-acetamide	0	0.891603	3	-0.174059	-0.723092	0	14.0993	0	1	1	1	1	1	3.90107	0	TRAIN
33	2,6-Dimethoxy-4-methyl-5-[3-(trifluoromethyl)phenoxy]-8-quinolinamine	0	0.932268	0	0	-4.47472	4.3258	12.9849	1	1	1	1	1	1	3.98208	0	TRAIN
35	2-[4-({2,6-Dimethoxy-4-methyl-5-[3-(trifluoromethyl)phenoxy]-8-quinolinyl}amino)pentyl]-1H-isoindole-1,3(2H)-dione	1	1.33341	2	-0.11886	-4.52816	4.63037	13.3554	1	1	1	1	1	1	4.49032	0	TRAIN
37	2-Aminoethyl methyl sulfone	0	0.35334	0	0	-2.79919	0	10.1512	0	1	0	0	0	0	3.36771	0	TRAIN
39	2-Chloro-6-methoxy-4-methylquinoline	0	0.383291	0	0	0.527932	4.22177	5.85525	0	0	1	1	0	0	3.70699	0	TRAIN
41	3-(2,3-Dihydro-1H-inden-2-yl)-1-[1-(2-methyl-1,3-oxazol-4-yl)-2-(4-morpholinyl)-2-oxoethyl]-6-[1-methylpropyl]-2,5-piperazinedione	2	0.959751	3	-1.03761	-1.03761	4.46517	14.3061	0	1	1	1	1	1	4.66752	0	TRAIN
43	3-Amino-2,3,4,5-tetrahydro-N-(1-methylethyl)-2,4-dioxo-N,5-diphenyl-1H-1,5-benzodiazepine-1-acetamide	0	0.861245	3	-1.43553	-1.43553	0	13.4534	0	1	1	1	1	1	3.89982	0	TRAIN
45	3-Hydroxy-4-methoxybenzaldehyde	0	0.225613	0	0	-0.0165741	0	10.2064	1	0	0	0	0	0	3.22122	0	TRAIN
47	3-Propoxybenzoic acid	0	0.263618	1	0	-0.928751	0	10.5714	0	0	0	0	0	0	2.99152	0	TRAIN
49	4-[4-({1-Butyl-3-[cyclohexyl(hydroxy)methyl]-2,5-dioxo-1,4,9-triazaspiro[5.5]undec-9-yl}methyl)phenoxy]benzoic acid	0	1.0423	3	-0.850046	-0.975396	0	13.816	0	1	1	1	1	1	4.68711	0	TRAIN
51	4-Fluoro-2-Pyrrolidine-Carboxamide	1	0.301623	1	-0.900463	-0.900463	0	12.2637	0	0	0	0	0	0	3.72214	0	TRAIN
53	4-Isopropenyl-1-methyl-2-methylene-cyclohexane	0	0.390939	0	0.721019	0.721019	0	4.08671	0	0	0	0	0	0	3.71258	0	TRAIN
55	4'-Methoxyacetophenone	0	0.263618	0	0	0.0765306	0	10.8042	0	0	0	0	0	0	3.51796	0	TRAIN
57	5-Amino-2-methylbenzene-sulfonamide	0	0.590298	0	0	-3.636	0	10.9281	0	0	1	0	0	0	3.52612	0	TRAIN
59	5-Methoxy-2-nitro-4-(trifluoromethyl) benzene acetonitrile	0	0.692921	1	0	-4.76262	0	12.6287	0	0	1	1	0	0	3.52709	0	TRAIN
61	6-Chloro-1-hexanol	0	-0.000213562	0	0	0.321712	0	8.3326	0	0	0	0	0	0	3.06837	0	TRAIN
63	6-Iodo-quinazolin-4-ol	0	0.315143	2	0	-0.0847074	0	11.232	0	1	0	0	0	0	3.56818	0	TRAIN
65	6-Methoxy-4-methyl-8-quinolinamine	0	0.366455	0	0	0.655602	4.23643	5.85898	0	1	1	1	0	0	3.70007	0	TRAIN
67	8-Hydroxy-5-{1-hydroxy-2-[(2-{4-[(4-methoxy-3-phenylphenyl)amino]phenyl}ethyl)amino]ethyl}-1,2-dihydroquinolin-2-one	0	0.831628	1	-0.781619	-0.781619	0	11.6156	0	0	1	1	1	1	4.25732	0	TRAIN
69	Anthranilic acid	0	0.284786	1	0	-0.98787	0	10.3418	0	1	0	0	0	0	2.97617	0	TRAIN
71	Benzaldehyde	0	0.0681483	0	0	0.729167	0	10.0065	0	0	0	0	0	0	3.04828	0	TRAIN
73	Bromobutane	0	-0.000213562	0	0	1.15625	0	3.30951	0	0	0	0	0	0	3.44419	0	TRAIN
75	b-Terpinene	0	0.301623	0	0.743611	0.743611	0	3.96336	0	0	0	0	0	0	3.20241	0	TRAIN
77	Chlorobenzene	0	0.106153	0	0	0.793981	0	5.53969	0	0	0	0	0	0	2.21212	0	TRAIN
79	Clarithromycin	0	2.18582	1	-1.55946	-1.9646	0	14.174	1	1	0	1	1	1	5.86139	0	TRAIN
81	Cytosine	0	0.212306	1	0	-0.412037	0	10.2436	0	1	0	0	0	0	3.6138	0	TRAIN
83	Dimethyl 4-cyano-4-(3-cyclopentyloxy-4-methoxyphenyl)-pimelate	1	0.612976	3	0.125717	-1.05314	0	11.7296	1	0	0	1	1	1	3.61859	0	TRAIN
85	Ethyl (Z)-a-[[2-(tert-butoxy)-1,1-dimethyl-2-oxoethoxy]imino]-2-(tritylamino)thiazol-4-acetate	1	1.29869	2	0	-1.46706	4.75982	13.0132	1	1	0	1	1	1	4.16223	0	TRAIN
87	Ethyl 2,6-dichloro-5-fluoro-b-oxo-3-pyridinepropanoate	0	0.548404	1	0	-0.871967	3.43037	13.0836	0	1	0	0	1	0	3.7332	0	TRAIN
89	Ethyl vanillin	0	0.225613	0	0	0.0578241	0	10.3371	1	0	0	0	0	0	3.23762	0	TRAIN
91	Furil	2	0.298306	0	0	-0.70375	0	11.4009	1	0	0	0	0	0	3.47141	0	TRAIN
93	Hexane	0	-0.000213562	0	0	1.355	0	2.23181	0	0	0	0	0	0	2.3014	0	TRAIN
95	Iodooctadecane	0	-0.000213562	0	0	1.34346	0	2.48669	0	0	0	0	1	0	2.86227	0	TRAIN
97	Isopropyl dicyandiamide	0	0.195256	2	-0.00925926	-0.00925926	0	8.14986	0	0	0	0	0	0	3.73783	0	TRAIN
99	Kanamycin	0	1.16265	0	-1.6616	-1.6616	0	10.9344	1	1	1	1	1	1	4.97454	0	TRAIN
101	m-Chloropropiophenone	0	0.263618	0	0	0.131944	0	11.107	0	0	0	0	0	0	3.10141	0	TRAIN
103	Methyl salicylate	0	0.246781	1	0	-0.524907	0	10.852	0	0	0	0	0	0	2.98152	0	TRAIN
105	N-(2-Chloro-4-pyrimidinyl)-N,2,3-trimethyl-2H-indazol-6-amine	1	0.613449	0	0	0.239915	4.49815	5.83098	0	0	0	1	1	0	4.06196	0	TRAIN
107	N-[(1-Butyl-4-piperidinyl)methyl]-3,4-dihydro-2H-[1,3]oxazino[3,2-a]indole-10-carboxamide	1	0.482812	1	0.580973	0.00950239	0	13.0252	0	1	0	1	1	1	3.47689	0	TRAIN
109	N-{2-(Benzyloxy)-5-[(1R)-2-bromo-1-hydroxyethyl]phenyl}formamide	0	0.345287	1	-0.624652	-0.624652	0	10.713	0	0	1	1	1	1	4.15256	0	TRAIN
111	Oxyfluorfen	0	0.867436	0	0	-4.51621	0	12.6044	0	0	1	1	1	1	3.52737	0	TRAIN
113	Phenylmethyl 2-(4-fluoro-2-methylphenyl)-4-oxo-3,4-dihydro-1 (2H)-pyridine-carboxylate	0	0.630286	0	-0.498728	-0.540437	0	13.3694	0	1	0	1	1	1	4.06279	0	TRAIN
115	Propylparaben	0	0.263618	1	0	-0.345509	0	11.211	0	0	0	0	0	0	3.04738	0	TRAIN
117	Rifamycin	1	1.90413	2	-1.11801	-1.98114	0	13.9249	1	1	1	1	1	1	6.72365	0	TRAIN
119	Salicylic acid	0	0.284786	1	0	-1.11287	0	10.2618	0	0	0	0	0	0	2.94736	0	TRAIN
121	Sulfanilamide	0	0.500981	0	0	-3.57514	0	10.6811	0	0	0	0	0	0	2.79812	0	TRAIN
123	Tartaric acid	0	0.449898	2	-2.2662	-2.2662	0	9.77185	1	0	0	0	0	0	3.49194	0	TRAIN
125	Ethyl-2-(Hydroxymethyl)-1,3-Propanediol Triacrylate	0	0.489819	3	0	-0.837292	0	11.1749	0	0	0	0	1	0	3.3928	0	TRAIN
127	Vinylidene dichloride	0	0.181949	0	0	0.111111	0	4.84568	0	0	0	0	0	0	3.67348	0	TRAIN
128	(2E)-2-Decenal	0	-0.000213562	0	0	0.839328	0	9.85324	0	0	0	0	1	1	2.88691	1	TRAIN
130	1 -Phenyloctane-1,3-dione	0	0.263618	0	0	-0.0675014	0	11.6669	0	0	0	0	1	0	3.10609	1	TRAIN
132	1-(2,5-Dimethylphenyl)-1,3-butanedione	0	0.497092	0	0	-0.087124	0	11.6073	0	0	0	0	0	0	3.68523	1	TRAIN
134	1,2-Dibromo-2,4-dicyanobutane	0	0.232019	2	0	-0.552847	0	8.57563	0	0	0	0	0	0	4.71064	1	TRAIN
136	1,6-Bis(2,3-epoxypropoxy)-hexane	0	0.13651	0	0.400966	0.400966	0	5.45222	1	0	0	0	1	1	3.90131	1	TRAIN
138	14-Hydroxynor-morphinone	1	0.766848	0	-0.73662	-1.14299	0	12.3486	1	0	1	1	0	0	5.34292	1	TRAIN
140	1-Chlorooctadecane	0	-0.000213562	0	0	0.845679	0	5.65985	0	0	0	0	1	0	2.74716	1	TRAIN
142	1-Methyl-3-nitro- nitrosoguanidine	0	0.339414	0	0	-0.954352	0	9.61333	0	1	1	0	0	0	4.09892	1	TRAIN
144	2-(4-Amino-2nitro-phenylamino)-ethanol	0	0.352934	0	0	-0.51779	0	10.5846	0	1	1	1	0	0	3.04399	1	TRAIN
146	2-(2,4-Diaminophenoxy)ethanol	0	0.263618	0	0	-0.0239916	0	8.48255	1	0	1	1	0	0	3.09957	1	TRAIN
148	2-Aminophenol	0	0.19547	0	0	0.145833	0	8.79426	0	0	0	0	0	0	2.49984	1	TRAIN
150	2-Bromo-5-hydroxy-benzaldehyde	0	0.263618	0	0	0.10213	0	10.2384	0	0	0	0	0	0	3.2897	1	TRAIN
152	2-Hydroxyethyl acrylate	0	0.10594	1	0	-0.50088	0	10.1193	1	0	0	0	0	0	3.02885	1	TRAIN
154	2-Methoxy-4-methylphenol	0	0.263618	0	0	0.188056	0	9.10995	1	0	0	0	0	0	3.25997	1	TRAIN
156	2-Nitro-p- phenylenediamine	0	0.390939	0	0	-0.563796	0	10.244	0	1	1	0	0	0	2.942	1	TRAIN
158	3,4-Dichloroaniline hydrochloride	0	0.301623	0	0	0.496914	0	5.60201	0	0	0	0	0	0	2.8305	1	TRAIN
160	3-Bromomethyl-5, 5'-dimethyl- dihydro-2(3H)-furanone	1	0.450358	1	0.0648148	-0.240556	0	10.9687	0	0	0	0	0	0	4.02034	1	TRAIN
162	3-Fluoro-5-(3-pyridinyl)benzen-amine	0	0.33198	0	0	-0.329766	3.95713	13.0132	0	0	0	1	0	0	3.28388	1	TRAIN
164	4,4,4-Trifluoro-1- phenylbutane-1,3- dione	0	0.590298	0	0	-4.94004	0	11.8235	0	0	0	0	0	0	3.40822	1	TRAIN
166	4-Methylamino- phenol sulfate	0	0.174301	0	0	0.3	0	8.82441	0	0	1	0	0	0	2.52376	1	TRAIN
168	5-Amino-O-Cresol	0	0.301623	0	0	0.259259	0	9.02009	0	1	0	0	0	0	3.41662	1	TRAIN
170	5-Methyl-2,3-hexanedione	0	0.377419	0	0.292963	-0.329907	0	10.6037	1	0	0	0	0	0	3.01572	1	TRAIN
172	2-Methoxy-4-methyl-4-(prop-2-en-1-yl)cyclohex-2-en-1-one	0	0.389698	0	0	0.0565509	0	11.2982	1	0	0	0	0	0	3.69944	1	TRAIN
174	6(E)-Nonenal	0	-0.000213562	0	0	0.722187	0	9.87571	0	0	0	0	0	0	3.02811	1	TRAIN
176	6-Methylisoeugenol	0	0.314929	0	0	0.21829	0	9.54112	1	0	0	0	0	0	3.24702	1	TRAIN
178	a-Butyl cinnamic aldehyde	0	0.136297	0	0	0.883824	0	10.747	0	0	0	0	1	0	3.14969	1	TRAIN
180	alpha-Methyl cinnamic aldehyde	0	0.174301	0	0	0.746481	0	10.2409	0	0	0	0	0	0	3.2529	1	TRAIN
182	Aniline	0	0.106153	0	0	0.821759	0	5.35778	0	0	0	0	0	0	2.18902	1	TRAIN
184	Benzyl benzoate	0	0.225827	1	0	-0.287543	0	11.5958	0	0	0	0	1	0	3.08502	1	TRAIN
186	Benzylidene acetone	0	0.212306	0	0	0.0776417	0	10.5303	0	0	0	0	0	0	3.15894	1	TRAIN
188	b-Phellandrene	0	0.301623	0	0.795694	0.795694	0	3.92114	0	0	0	0	0	0	3.51846	1	TRAIN
190	Bromodocosane	0	-0.000213562	0	0	1.18647	0	3.50204	0	0	0	0	1	0	2.82616	1	TRAIN
192	Bromoeicosane	0	-0.000213562	0	0	1.18625	0	3.4969	0	0	0	0	1	0	2.80293	1	TRAIN
194	Bromohexadecane	0	-0.000213562	0	0	1.18555	0	3.48303	0	0	0	0	1	0	2.77696	1	TRAIN
196	Bromooctadecane	0	-0.000213562	0	0	1.18596	0	3.49069	0	0	0	0	1	0	2.78587	1	TRAIN
198	Bromotetradecane	0	-0.000213562	0	0	1.18495	0	3.47333	0	0	0	0	1	0	2.77923	1	TRAIN
200	Bromoundecane	0	-0.000213562	0	0	1.18337	0	3.45275	0	0	0	0	1	0	2.81541	1	TRAIN
202	Butyl glycidyl ether	0	0.0681483	0	0.432274	0.432274	0	5.27296	1	0	0	0	0	0	3.50346	1	TRAIN
204	C4-azlactone	1	0.440321	2	0	-0.649727	0	11.1326	0	0	0	0	0	0	3.41187	1	TRAIN
206	Cinnamic alcohol	0	0.0681483	0	0	0.106046	0	8.44077	0	0	0	0	0	0	3.03114	1	TRAIN
208	Citral	0	0.250098	0	0	0.84509	0	10.0205	0	0	0	0	0	0	3.19969	1	TRAIN
210	Cyclamen aldehyde	0	0.369771	0	0.124907	0.124907	0	10.4844	0	0	0	0	0	0	4.14667	1	TRAIN
212	Diethylacetaldehyde	0	0.0679348	0	0.305556	0.305556	0	9.96713	0	0	0	0	0	0	3.05385	1	TRAIN
214	Dihydroeugenol	0	0.225613	0	0	0.205882	0	9.27818	1	0	0	0	0	0	3.02939	1	TRAIN
216	Dipropylene triamine	0	-0.000213562	0	0	0.773438	0	5.27856	0	0	0	1	0	0	2.80742	1	TRAIN
218	Ethyl (3-endo)-8- methyl-8- azabicyclo[3,2,1]- octane-3-acetate	1	0.383291	1	0.567361	-0.00791383	0	11.3907	0	0	0	0	1	0	4.11897	1	TRAIN
220	2-(Hydroxymethyl)pentane-1,3-diol	0	0.157251	0	-0.569444	-0.569444	0	8.99769	0	0	0	0	0	0	3.40334	1	TRAIN
222	2-Methyl propenoic acid	0	0.271266	1	0	-0.935185	0	9.59954	0	0	0	0	0	0	2.63821	1	TRAIN
224	Fluorescein isothiocyanate	1	0.819958	2	0	-1.26721	0	12.799	0	0	1	1	1	0	4.36095	1	TRAIN
226	Iododecane	0	-0.000213562	0	0	1.34153	0	2.471	0	0	0	0	1	0	2.9112	1	TRAIN
228	Iodononane	0	-0.000213562	0	0	1.33883	0	2.45586	0	0	0	0	0	0	3.02672	1	TRAIN
230	Isoeugenol	0	0.225613	0	0	0.171994	0	9.25409	1	0	0	0	0	0	3.15436	1	TRAIN
232	Isopropyl isoeugenol	0	0.369771	0	0.0710705	0.0710705	0	9.50298	1	0	0	0	0	0	3.18911	1	TRAIN
234	Lauryl gallate	0	0.442251	1	0	-0.637737	0	11.7947	1	0	0	0	1	1	2.92996	1	TRAIN
236	Linalool aldehyde	0	0.398833	0	0	-0.819777	0	10.179	0	0	0	0	0	0	3.6264	1	TRAIN
238	Methyl 2-nonynoate	0	0.10594	1	0	-0.43936	0	10.5048	0	0	0	0	1	0	3.02381	1	TRAIN
240	Methyl hexadec-1-ene-1- sulfonate	0	0.29268	0	0	-3.41638	0	11.0088	0	0	0	0	1	1	3.11669	1	TRAIN
242	m-Phenylenebis-(methylamine)	0	0.136297	0	0	1.13134	0	3.06167	0	0	0	0	0	0	2.69357	1	TRAIN
244	Nonanoyl chloride	0	0.143944	1	0	-0.193989	0	10.298	0	0	0	0	0	0	3.00036	1	TRAIN
246	Octanol	0	-0.000213562	0	0	0.367188	0	8.42278	0	0	0	0	0	0	2.48108	1	TRAIN
248	(4E)-4-(Ethoxymethylene)-2-phenyl-1,3-oxazol-5(4H)-one	1	0.277138	2	0	-0.479349	0	11.3788	0	0	0	0	1	0	3.68986	1	TRAIN
250	Phenyl benzoate	0	0.225827	1	0	-0.331667	0	11.5919	0	0	0	0	1	0	2.9699	1	TRAIN
252	Trimethylhexamine diamine	0	0.43262	0	0.591713	-0.0331363	0	5.92996	0	0	0	1	0	0	3.16844	1	TRAIN
254	Veratraldehyde	0	0.187608	0	0	0.571389	0	10.3779	1	0	0	0	0	0	3.34052	1	TRAIN
256	(2E,4E)-2,4-Hexadienal	0	-0.000213562	0	0	0.75	0	9.55899	0	0	0	0	0	0	3.41463	1	TRAIN
258	1-(2',3',4',5'-Tetramethylphenyl)butane-1,3-dione	0	0.658888	0	0	-0.083073	0	11.8708	0	0	0	0	0	0	3.38006	1	TRAIN
260	1,1-Dimethylethyl3-[[[[(3s)-2,3,4,5-tetrahydro-1-[2-[(1-methylethyl)pheny lamino]-2-oxoethyl]-2,4-dioxo-5-phenyl-1h-1,5-benzodiazepin-3-yl]amino]carbonyl]amino]benzoate	0	1.50877	4	-1.72345	-1.72345	0	14.4282	0	1	1	1	1	1	4.30694	1	TRAIN
262	1,3-Benzodioxazole-5- sulphonyl chloride	1	0.514502	0	0	-3.68773	0	10.9018	0	0	0	0	0	0	3.60519	1	TRAIN
264	12-Bromododecanoic acid	0	0.143944	1	0	-0.662247	0	10.231	0	0	0	0	1	1	2.87127	1	TRAIN
266	1-Phenyl-1,2-propanedione	0	0.284786	0	0	-0.42537	0	10.9949	1	0	0	0	0	0	3.39124	1	TRAIN
268	2-(3,4-Dimethylphenyl)-5-methyl-2,4-dihydro-3H-pyrazol-3-one	1	0.510613	1	0	-0.0178212	0	11.5684	0	0	0	1	0	0	3.9391	1	TRAIN
270	2,2,6,6-Tetramethyl-heptane-3,5-dione	0	0.865453	0	0	-0.401875	0	11.5008	0	0	0	0	0	0	2.96633	1	TRAIN
272	2,4,6-Trichloro- 1,3,5-triazine	0	0.318459	0	0	0	3.45864	5.31914	0	0	0	0	0	0	4.09834	1	TRAIN
274	2,4-Dinitrobenzene sulfonic acid	0	0.768931	0	0	-4.78522	0	10.7206	0	1	1	0	0	0	3.26379	1	TRAIN
276	2,5-Diaminotoluene	0	0.301623	0	0	0.765463	0	5.53315	0	0	0	0	0	0	3.15272	1	TRAIN
278	2,6-Dimethoxy-4-methyl-8-nitro-5-[3-(trifluoromethyl)-phenoxy]quinoline	0	1.02158	0	0	-4.54976	4.1308	13.0153	1	1	1	1	1	1	4.00238	1	TRAIN
280	2-Amino-di- phenylamine	0	0.225827	0	0	0.760512	0	5.80589	0	0	0	1	0	0	2.50709	1	TRAIN
282	2-Chloro-1-[(3- fluorophenyl)- methoxy]-4-nitrobenzene	0	0.527449	0	0	-0.539452	0	12.9574	0	0	1	1	1	1	3.19843	1	TRAIN
284	2-Methyl-5-hydroxy-ethylaminophenol	0	0.263618	0	0	0.0919031	0	9.29693	0	1	0	0	0	0	3.36164	1	TRAIN
286	3,4-Dihydrocoumarin	0	0.225827	1	0	-0.121574	0	10.8036	0	0	0	0	0	0	3.24858	1	TRAIN
288	3-Aminophenol	0	0.212306	0	0	0.212963	0	8.73306	0	1	0	0	0	0	2.48496	1	TRAIN
290	3-Ethoxy-1-(2',3',4',5'-tetramethylphenyl)propane-1,3-dione	0	0.620883	1	0	-0.460388	0	12.0657	0	0	0	0	1	0	3.36596	1	TRAIN
292	3-Methylisoeugenol	0	0.298093	0	0	0.188197	0	9.43492	1	0	0	0	0	0	3.25628	1	TRAIN
294	3-Propylidene phthalide	1	0.260301	1	0	-0.240463	0	11.2877	0	0	0	0	0	0	3.57776	1	TRAIN
296	4-(N-Ethyl-N-2- methan-sulfamido- ethyl)-2-methyl- 1,4,-phenylene-diamine	0	0.668483	0	0	-3.12175	0	10.9902	0	0	1	1	1	0	3.48555	1	TRAIN
298	4,4-Dibromobenzil	0	0.5912	0	0	-0.46931	0	12.0099	1	0	0	0	1	0	4.06657	1	TRAIN
300	4-Bromo-1- phthalimidopentane	1	0.476939	2	0.414521	-0.159421	0	11.9762	0	0	0	0	1	0	3.68963	1	TRAIN
302	4-Iodo-1-phthalimido-pentane	1	0.476939	2	0.572021	-0.146564	0	11.9861	0	0	0	0	1	0	3.80018	1	TRAIN
304	4-Nitrobenzyl bromide	0	0.263618	0	0	-0.404751	0	10.1944	0	0	0	0	0	0	3.58142	1	TRAIN
306	5'-Chloro-2'- hydroxy-3'-nitro- [1,1'-biphenyl]-3- carboxylic acid	0	0.689245	1	0	-1.13623	0	10.9147	0	0	0	1	0	0	3.35663	1	TRAIN
308	5-Chloro-6-methoxy-4-methyl-8-nitro-2(1h)quinolinone	0	0.634404	1	0	-0.586744	0	11.3924	0	1	1	1	0	0	3.66041	1	TRAIN
310	5-Methyl-2-phenyl-2-hexenal	0	0.263618	0	0.591354	0.591354	0	10.8497	0	0	0	0	0	0	3.37863	1	TRAIN
312	6-Diethylaminohexyl bromide hydrobromide	0	0.0679348	0	0	1.16495	0	3.44733	0	0	0	1	0	0	2.96958	1	TRAIN
314	7-[(4z)-3-(Aminomethyl)-4-(methoxyimino)-1 -pyrrolidinyl]-1-cyclopropyl-6-fluoro-1,4-dihydro-4-oxo-1,8-naphthyridine-3 -carboxylic acid,monomethane-sulfonate	1	0.818909	1	-0.0862423	-1.33654	4.42688	14.8745	0	1	1	1	1	1	4.44076	1	TRAIN
316	8-Chloro-3-pentyl-3,7-dihydro-1h-purine-2,6-dione	1	0.455771	1	0	-0.489684	3.96635	11.6679	0	1	1	1	0	0	4.07317	1	TRAIN
318	a-Phellandrenea	0	0.301623	0	0.781204	0.781204	0	2.33333	0	0	0	0	0	0	3.43798	1	TRAIN
320	Azithromycin	0	2.26332	1	-1.28029	-1.79881	0	14.1976	1	1	1	1	1	1	5.85439	1	TRAIN
322	Benzalkonium chloride	0	0.361042	0	0	1.11287	0	2.36661	0	0	0	1	1	0	3.23364	1	TRAIN
324	Benzoquinone	0	0.212306	0	0	-0.120741	0	10.2828	0	0	0	0	0	0	3.267	1	TRAIN
326	Butanedione	0	0.271266	0	0	-0.37963	0	9.79398	1	0	0	0	0	0	2.74143	1	TRAIN
328	C17-azlactone	1	0.440321	2	0	-0.661865	0	11.5298	0	0	0	1	1	1	3.10769	1	TRAIN
330	C9-azlactone	1	0.440321	2	0	-0.65629	0	11.3765	0	0	0	1	1	1	3.16963	1	TRAIN
332	Chlorothalonil	0	0.459889	2	0	-0.0746296	0	8.70454	0	0	0	0	0	0	3.61128	1	TRAIN
334	Dicyclohexylcarbod iimide	0	0.13651	1	0.533417	0.533417	0	4.46061	0	0	0	1	1	0	3.28967	1	TRAIN
336	2-methoxy-5-propylphenol	0	0.225613	0	0	0.225417	0	9.39298	1	0	0	0	0	0	3.02939	1	TRAIN
338	Dimethyl sulfoxide	0	0.181949	0	0	-0.611111	0	9.55556	0	0	0	0	0	0	3.67267	1	TRAIN
340	Ethyl 4-iodobenzoate	0	0.263618	1	0	-0.255648	0	11.1313	0	0	0	0	0	0	3.41514	1	TRAIN
342	Ethylenediamine	0	-0.000213562	0	0	0.597222	0	4.90278	0	0	0	0	0	0	2.67018	1	TRAIN
344	Geraniol	0	0.250098	0	0	0.167316	0	8.55338	0	0	0	0	0	0	3.02558	1	TRAIN
346	Glyceryl thioglycolate	0	0.212093	1	-0.982562	-0.982562	0	10.3408	1	0	0	0	0	0	3.53024	1	TRAIN
348	Hydroxyethyl-ethylenediamine	0	-0.000213562	0	0	0.194444	0	8.18957	0	0	0	0	0	0	2.95947	1	TRAIN
350	Iodopropynyl butylcarbamate	0	0.10594	0	0	-0.457593	0	10.7544	0	0	0	0	1	0	4.04952	1	TRAIN
352	Lauryl sulfate	0	0.35334	0	0	-4.23438	0	10.2249	0	0	0	0	1	1	2.98276	1	TRAIN
354	Methyl 4-(bromomethyl)benzoate	0	0.225613	1	0	-0.295257	0	10.9791	0	0	0	0	0	0	3.88818	1	TRAIN
356	Methyl hexadecane sulfonate	0	0.29268	0	0	-3.23582	0	11.0956	0	0	0	0	1	1	2.97293	1	TRAIN
358	Methyl pyruvate	0	0.233261	1	0	-0.791667	0	9.93981	1	0	0	0	0	0	2.92865	1	TRAIN
360	1,3-benzenedimethanamine	0	0.136297	0	0	0.591111	0	5.43259	0	0	0	0	0	0	3.13216	1	TRAIN
362	N-[2-(Diethylamino)ethyl]-2-[[(4-fluorophenyl)-methyl]thio]-4,5,6,7-tetrahydro-4-oxo-n-[[4'-(trifluoromethyl)-[1,1'-biphenyl]-4-yl]methyl]-1h-cyclopentapyrim-idine-1-acetamide	1	1.2946	2	0	-4.39185	0	14.0941	0	1	1	1	1	1	4.34006	1	TRAIN
364	N-Isopropyl-n-phenyl-2-(2-phenylamino-phenylamino)-acetamide	0	0.524133	1	0.0827662	0.0330687	0	12.8711	0	0	0	1	1	1	3.02966	1	TRAIN
366	Oleyl methanesulfonate	0	0.35334	0	0	-3.25245	0	10.763	0	0	0	0	1	1	3.09165	1	TRAIN
368	Oxalic acid	0	0.271266	2	0	-1.82407	0	9.09954	1	0	0	0	0	0	2.54964	1	TRAIN
370	Penicillin G	1	0.862632	3	-0.854375	-1.00703	0	12.2683	0	0	1	1	1	1	4.20818	1	TRAIN
372	Perillaldehyde	0	0.263618	0	0.609907	0.609907	0	10.3457	0	0	0	0	0	0	3.60518	1	TRAIN
374	p-Methylhydrocinnamic aldehyde	0	0.174301	0	0	0.628037	0	10.0451	0	0	0	0	0	0	3.88596	1	TRAIN
376	p-tert-Butylphenyl Glycidyl Ether	0	0.531339	0	0.326197	0.206482	0	5.57258	1	0	0	0	1	0	4.02484	1	TRAIN
378	R-Carvone	0	0.390939	0	0.39463	0.281713	0	11.1995	0	0	0	0	0	0	3.52233	1	TRAIN
380	Sodium ethyl xanthate	0	0.143944	0	0	0.31713	0	4.63735	0	0	0	0	0	0	3.79001	1	TRAIN
382	Sodium-3,3,5-trimethyl-benzenesulfonate	0	1.02884	1	0.203327	-4.22786	0	11.8007	0	0	0	0	1	1	3.64048	1	TRAIN
384	Tetramethyl thiuram disulfide	0	0.466735	0	0	0.837222	0	5.0728	0	0	0	1	0	0	3.98027	1	TRAIN
386	Undec-10-enal	0	-0.000213562	0	0	0.742716	0	9.96782	0	0	0	0	1	1	2.86948	1	TRAIN
389	Ethyl (2-(4-chlorophenoxy)-2-methylpropanoate	0	0.546474	1	0	-0.996191	0	11.5628	1	0	0	0	1	0	3.18963	0	TRAIN
391	Streptomycin sulfate	1	1.46413	0	-1.83953	-2.38778	0	12.0631	1	1	1	1	1	1	5.39926	0	TRAIN
392	1,2-cyclohexane dicarboxylic anhydride	1	0.298306	2	-0.100694	-0.291944	0	10.9759	0	0	0	0	0	0	3.5932	1	TRAIN
394	4-Aminocresol; 3-methyl-4-aminophenol (SCCP/0898/05)	0	0.301623	0	0	0.265463	0	8.88194	0	0	1	0	0	0	3.0692	1	TRAIN
396	5-methyl-2-phenyl-2,4-dihydro-pyrazol-3-one (Phenylmethylpyrazole; A039)	1	0.315143	1	0	-0.0243519	0	11.3722	0	0	0	0	0	0	3.30886	1	TRAIN
398	Diphenylcyclopropenone	0	0.29499	0	0	0.178148	0	11.7448	0	0	0	0	1	0	3.82031	1	TRAIN
400	HC Red 13	0	0.404246	0	0	-0.589947	0	10.6379	0	1	1	1	0	0	3.44586	1	TRAIN
402	N,N-dimethyl-4-nitrosoaniline	0	0.263618	0	0	0.468148	0	10.024	0	0	0	1	0	0	3.1552	1	TRAIN
404	Propyl gallate	0	0.442251	1	0	-0.650887	0	11.2932	1	0	0	0	0	0	2.92943	1	TRAIN
No.	Name	nR05	Eta_B	C-040	minsssCH	gmin	MaxaaN	gmax	B03[O-O]	B04[N-O]	B05[N-O]	B06[C-N]	B09[C-C]	B10[C-O]	SAscore	Activity	Set
2	(2-Bromo-5-propoxyphenyl)-(2-hydroxy-4-methoxyphenyl)methanone	0	0.523919	0	0	-0.283355	0	12.6272	0	0	0	0	1	1	3.67089	0	TEST
4	(2-oxo-1-phenylpyrrolidin-3-yl)-Triphenylphosphanium	1	0.529466	1	-0.0556425	-0.0556425	0	14.0332	0	0	0	1	1	0	3.99118	0	TEST
6	3-Hydroxy-2,4,7,14-tetramethyl-9-oxo-4-vinyltricyclo[5.4.3.01,8]tetradec-6-yl [(8-methyl-8-azabicyclo[3.2.1]oct-3-yl)sulfanyl]acetate	2	1.38597	1	-0.618855	-0.618855	0	13.523	0	0	0	1	1	1	5.84389	0	TEST
8	1-(2',3',4',5'-Tetramethylphenyl)-3-(4'-tetrabutylphenyl)- propane-1,3-dione	0	0.740557	0	0	-0.108961	0	12.6524	0	0	0	0	1	1	3.76649	0	TEST
10	1(2H)-Pyridazinamine	0	0.106153	0	0	1.25	0	5.16333	0	0	0	0	0	0	6.31231	0	TEST
12	1-(4-Ethoxyphenyl)-2-[4-(methylsulfonyl)phenyl]ethanone	0	0.688803	0	0	-3.2093	0	12.206	0	0	0	0	1	1	3.85372	0	TEST
14	1-(tert-Butoxycarbonyl)-4-fluoro-L-proline	1	0.795804	1	-1.29758	-1.29758	0	13.0646	0	0	0	0	0	0	3.80471	0	TEST
16	1,1-Dimethylethyl[1-[bis(4-fluorophenyl)-methyl]-2-[2-cyano-4-fluoro-1-pyrrolidinyl]-2-oxoethyl]carbamate	1	1.19262	2	-1.38345	-1.38345	0	14.1149	0	0	1	1	1	0	4.61073	0	TEST
18	1,3-bis(2,5-dimethylphenyl)propane-1,3-dione	0	0.706082	0	0	-0.109161	0	12.3769	0	0	0	0	1	0	4.02389	0	TEST
20	1-[1-3-(1,3-Benzodioxol-5-yl)-(2-benzyloxy-4- methoxyphenyl)-1- hydroxy-6- propoxy-2-indanoyl]-3,4- dimethyl-5-phenyl-imidazolidinone	3	1.36423	1	-1.25868	-2.03844	0	15.8443	0	1	0	1	1	1	5.50099	0	TEST
22	[4S-[1(E),4alpha,5alpha]]-1-[3-[2-[4-Methoxy-2-(phenylmethoxy)-benzoyl]-4-propoxyphenyl]-1-oxo-2-propenyl]-3,4-dimethyl-5-phenyl-2-imidazoli-dinone	1	1.0279	1	-0.45334	-0.47584	0	14.2345	0	1	0	1	1	1	4.80387	0	TEST
24	1-[3,5-Bis(trifluoromethyl)phenyl]-N-methylethanamine	0	0.947121	0	-0.603333	-4.80211	0	12.5157	0	0	0	0	0	0	3.60428	0	TEST
26	1-Phenylpropylamine	0	0.157465	0	0.209444	0.209444	0	5.79426	0	0	0	0	0	0	3.53127	0	TEST
28	2-(4-Oxopentyl)-1H-isoindole-1,3(2H)-dione	1	0.476939	2	0	-0.255415	0	11.903	0	0	1	0	1	0	3.10921	0	TEST
30	2,3,3a,4,5,6a-Hexahydrofuro[5,4-b]furan-3-yl N-[3-(1,3-benzodioxol-5-ylsulfonyl-isobutyl-amino)-2-hydroxy-1-[[4-[(2-methylthiazol-4-yl)methoxy]phenyl]methyl]propyl]carbamate	4	1.38512	0	-1.29972	-4.06703	4.41725	13.9081	1	0	1	1	1	1	5.13965	0	TEST
32	2,3-Dimethyl-2H-indazol-6-amine	1	0.404459	0	0	0.764444	4.31019	5.63395	0	0	0	1	0	0	3.61845	0	TEST
34	2-[(Benzyloxy)-imino]malonic acid	0	0.390939	2	0	-1.63837	0	10.3917	0	0	0	1	0	0	3.47159	0	TEST
36	2-Acetylcyclohexanone	0	0.284786	0	-0.255787	-0.255787	0	11.0149	0	0	0	0	0	0	3.22806	0	TEST
38	2-Bromo-5-propoxybenzoic acid	0	0.352934	1	0	-0.959423	0	10.7622	0	0	0	0	0	0	3.26084	0	TEST
40	2-Hydroxypropyl methacrylate	0	0.377419	1	-0.608056	-0.608056	0	10.6144	1	0	0	0	0	0	3.25766	0	TEST
42	3-{4-[(6-Bromohexyl)oxy]butyl}benzenesulfonamide	0	0.462977	0	0	-3.60533	0	11.2827	0	0	0	1	1	1	3.31709	0	TEST
44	3-Hydroxy-2-phenyl-4-quinolinecarboxylic acid	0	0.490459	1	0	-1.16826	4.37472	11.4315	0	0	1	0	1	0	3.29533	0	TEST
46	3-Isopropyl-6-methylcyclohexene	0	0.301623	0	0.828704	0.828704	0	2.40162	0	0	0	0	0	0	3.50639	0	TEST
48	4'-(Trifluoromethyl)-[1,1'- biphenyl]-4-carboxaldehyde	0	0.58265	0	0	-4.31954	0	12.3819	0	0	0	0	1	1	3.94094	0	TEST
50	4-Cyano-4-[3-(cyclopentyloxy)-4-methoxyphenyl]cyclohexanecarboxylic acid	1	0.596353	2	-0.338951	-0.757846	0	11.2017	1	0	0	1	1	1	3.58674	0	TEST
52	4-Hydroxybenzoic acid	0	0.301623	1	0	-0.986111	0	10.2306	0	0	0	0	0	0	2.99994	0	TEST
54	4-Isopropyl-1-methylene-cyclohexane	0	0.301623	0	0.8825	0.8825	0	4.00795	0	0	0	0	0	0	2.97509	0	TEST
56	5-({4-[(2,3-Dimethyl-2H-indazol-6-yl)(methyl)amino]-2-pyrimidinyl}amino)-2-methylbenzenesulfonamide	1	1.12795	0	0	-3.82198	4.55883	11.7798	0	0	1	1	1	1	4.13806	0	TEST
58	5-Chloro-2,6-dimethoxy-4-methylquinoline	0	0.417766	0	0	0.589105	4.32856	6.23671	0	0	1	1	1	0	3.78681	0	TEST
60	5-Methyl-6-(trifluoromethyl)indoline	1	0.603818	0	0	-4.24664	0	12.4894	0	0	0	0	0	0	3.59691	0	TEST
62	6-Ethenyldeca-hydro-5-hydroxy-4,6,9,10-tetramethyl-1-oxo-3a,9-propano-3ah-cyclopentacyclo-octen-8-yl [[(3-exo)-8-methyl-8-azabicyclo-[3.2.1]oct-3-yl]thio]-acetate	1	1.10861	1	-0.669736	-0.686035	0	13.1251	1	0	0	0	0	0	5.13984	0	TEST
64	6-Methoxy-4-methyl-2(1H)-quinolinone	0	0.383291	1	0	-0.06929	0	11.1719	0	0	1	1	0	0	3.34217	0	TEST
66	6-Methylcoumarin	0	0.33198	1	0	-0.299673	0	10.8017	0	0	0	0	0	0	3.56237	0	TEST
68	Adipic acid	0	0.288102	2	0	-0.87001	0	9.89655	0	0	0	0	0	0	2.61704	0	TEST
70	Atrazine	0	0.386608	0	0.266614	0.193611	4.13458	5.72697	0	0	0	1	0	0	3.66444	0	TEST
72	Benzocaine	0	0.263618	1	0	-0.30787	0	11.0929	0	0	0	0	0	0	3.07304	0	TEST
74	Bromononane	0	-0.000213562	0	0	1.18133	0	3.43221	0	0	0	0	0	0	2.87667	0	TEST
76	Butanol	0	-0.000213562	0	0	0.34375	0	8.06625	0	0	0	0	0	0	2.58841	0	TEST
78	Chlorononane	0	-0.000213562	0	0	0.841049	0	5.54162	0	0	0	0	0	0	2.80062	0	TEST
80	Coumarin	0	0.225827	1	0	-0.30213	0	10.7168	0	0	0	0	0	0	3.27431	0	TEST
82	Diethyl pthalate	0	0.298093	2	0	-0.508192	0	11.5442	0	0	0	0	1	0	3.30624	0	TEST
84	Dimethyl carbonate	0	0.10594	0	0	-0.657407	0	9.73611	0	0	0	0	0	0	3.32428	0	TEST
86	Ethyl 1H-1,2,4-triazole-5-carboxylate	1	0.157465	1	0	-0.472222	3.45468	10.7498	0	1	0	1	0	0	4.10895	0	TEST
88	Ethyl benzoylacetate	0	0.263618	1	0	-0.470969	0	11.4291	0	0	0	0	1	0	3.17253	0	TEST
90	Fumaric acid	0	0.288102	2	0	-1.25704	0	9.55361	0	0	0	0	0	0	2.93531	0	TEST
92	Glycerol	0	0.10594	0	-0.953704	-0.953704	0	8.16667	1	0	0	0	0	0	2.85309	0	TEST
94	Iodohexane	0	-0.000213562	0	0	1.33111	0	2.42711	0	0	0	0	0	0	3.31233	0	TEST
96	Isopropanol	0	0.181949	0	-0.166667	-0.166667	0	8.05556	0	0	0	0	0	0	2.12771	0	TEST
98	Isopropyl eugenol	0	0.369771	0	0.0693344	0.0693344	0	9.50124	1	0	0	0	0	0	3.2078	0	TEST
100	Lactic acid	0	0.271266	1	-1.23148	-1.23148	0	9.44907	1	0	0	0	0	0	2.83655	0	TEST
102	Methyl 4-hydroxybenzoate	0	0.263618	1	0	-0.398148	0	10.8209	0	0	0	0	0	0	3.02884	0	TEST
104	N-(2-Chloro-4-pyrimidinyl)-2,3-dimethyl-2H-indazol-6-amine	1	0.54097	0	0	0.221999	4.45037	5.75234	0	0	0	1	1	0	3.84845	0	TEST
106	N-[(1,1-Dimethylethoxy)-carbonyl]-L- tyrosine, ethyl ester	0	0.791473	1	-0.847831	-0.847831	0	11.9738	0	0	0	1	1	1	3.63235	0	TEST
108	N-{[(1,1-Dimethylethyl)oxy] carbonyl}-4-fluoro- b-(4-fluorophenyl)-L- phenylalanine	0	1.02163	1	-1.40669	-1.40669	0	13.3054	0	0	0	1	1	0	4.04224	0	TEST
110	Octanoic acid	0	0.143944	1	0	-0.669909	0	10.032	0	0	0	0	0	0	2.47618	0	TEST
112	Pentaerythritol triacrylate	0	0.489819	3	0	-1.28174	0	11.0932	0	0	0	0	1	0	3.40874	0	TEST
114	Propylene glycol	0	0.143944	0	-0.560185	-0.560185	0	8.11111	1	0	0	0	0	0	2.76957	0	TEST
116	Quinoxyfen	0	0.54097	0	0	-0.317823	4.21038	12.8856	0	1	0	1	1	0	3.46794	0	TEST
118	Saccharin	1	0.47501	1	0	-3.55433	0	11.1315	0	0	0	0	0	0	3.35637	0	TEST
120	Succinic Acid	0	0.288102	2	0	-1.07648	0	9.64042	0	0	0	0	0	0	2.67255	0	TEST
122	Sulfanilic acid	0	0.500981	0	0	-4.07514	0	10.4589	0	0	0	0	0	0	2.9255	0	TEST
124	tert-Butyl 3-Aminobenzoate	0	0.617171	1	0	-0.470549	0	11.5347	0	0	1	1	0	0	3.03353	0	TEST
126	Vanillin	0	0.225613	0	0	0.0399074	0	10.2487	1	0	0	0	0	0	3.22122	0	TEST
388	8-[(4-Amino-3-nitrophenyl)azo]-7-hydroxy-N,N,N-trimethyl-2-naphthalenaminium chloride (Basic brown 17, B007) (SCCP0683/03)	0	1.00828	0	0	-0.564502	0	12.3776	0	1	1	1	1	1	4.26226	0	TEST
390	Nonanoic acid	0	0.143944	1	0	-0.666212	0	10.0882	0	0	0	0	0	0	2.47868	0	TEST
129	(E)-Anethol	0	0.136297	0	0	0.90116	0	5.02322	0	0	0	0	0	0	3.26376	1	TEST
131	1-(2',5'-diethylphenyl)butane-1,3-dione	0	0.421083	0	0	-0.075042	0	11.8821	0	0	0	0	0	0	3.34594	1	TEST
133	1,2-Benzisothiazolin-3-one	1	0.20899	1	0	0.0144444	0	10.9336	0	0	0	0	0	0	3.59415	1	TEST
135	1,5-Dimethyl-3-(1-oxo-2-propenyl)-4-phenyl-2-imidazolidinone	1	0.511414	1	-0.25537	-0.356432	0	12.083	0	1	0	1	0	0	4.19617	1	TEST
137	12-Bromo-1-dodecanol	0	-0.000213562	0	0	0.367604	0	8.5856	0	0	0	0	1	1	2.87977	1	TEST
139	1-Chloro-2,4- dinitrobenzene	0	0.480255	0	0	-0.768519	0	10.2951	0	0	1	0	0	0	3.04711	1	TEST
141	1-Iododecane	0	-0.000213562	0	0	1.34	0	2.46185	0	0	0	0	1	0	2.97648	1	TEST
143	1-Naphthol	0	0.20899	0	0	0.350093	0	9.3712	0	0	0	0	0	0	2.59271	1	TEST
145	2(E)-Hexenal	0	-0.000213562	0	0	0.80125	0	9.59287	0	0	0	0	0	0	3.16619	1	TEST
147	2-[1-(4-Bromophenyl)-1-phenylethoxy]-N,N-dimethyl-ethanamine hydrochloride	0	0.565307	0	0	-0.432569	0	6.29545	0	0	0	1	1	0	3.94532	1	TEST
149	2-Benzyl-tert-butylamino-3'-hydroxymethyl-4'-hydroxyaceto-phenone	0	0.77812	0	0	-0.291713	0	12.6665	0	0	0	1	1	1	3.48982	1	TEST
151	2-Ethylhexyl acrylate	0	0.174088	1	0.517454	-0.310233	0	10.7657	0	0	0	0	1	0	3.22543	1	TEST
153	2-Mercapto-benzothiazole	1	0.225827	0	0	0.834444	4.19586	4.19586	0	0	0	0	0	0	3.2309	1	TEST
155	2-Methylundecanal	0	0.10594	0	0.273742	0.273742	0	10.3099	0	0	0	0	1	1	3.09206	1	TEST
157	4-Sulfophenyl-6-((1-oxononyl)amino)hexanoate (Nonanoylamidocaproylacidoxybenzenesulfonate)	0	0.747763	2	-0.404103	-4.41498	0	12.0011	0	0	0	1	1	1	3.69023	1	TEST
159	3,5,5-Trimethyl- hexanoyl chloride	0	0.603651	1	0.402778	-0.220602	0	10.5054	0	0	0	0	0	0	3.65759	1	TEST
161	3-Dimethylamino- propylamine	0	0.143944	0	0	0.80375	0	5.25014	0	0	0	0	0	0	2.65781	1	TEST
163	3-Methyleugenol	0	0.314929	0	0	0.193843	0	9.53951	1	0	0	0	0	0	3.08445	1	TEST
165	4-Allylanisole	0	0.136297	0	0	0.900752	0	5.02148	0	0	0	0	0	0	3.28667	1	TEST
167	4-Phenylene-diamine	0	0.212306	0	0	0.749259	0	5.37111	0	0	0	0	0	0	2.51735	1	TEST
169	5-Chloro-2-methyl- 4-isothiazolin-3-one	1	0.301623	1	0	-0.0416667	0	10.5288	0	0	0	0	0	0	4.19413	1	TEST
171	5-Methyleugenol	0	0.314929	0	0	0.187789	0	9.43318	1	0	0	0	0	0	3.24366	1	TEST
173	6-(Diethylamino)- 1 -hexanol	0	0.0679348	0	0	0.35245	0	8.5567	0	0	0	1	0	0	2.63245	1	TEST
175	6-Methyleugenol	0	0.314929	0	0	0.217882	0	9.53939	1	0	0	0	0	0	3.2673	1	TEST
177	a-Amyl cinnamic aldehyde	0	0.136297	0	0	0.895074	0	10.8353	0	0	0	0	1	0	3.11755	1	TEST
179	a-Hexyl cinnamic aldehyde	0	0.136297	0	0	0.901185	0	10.9048	0	0	0	0	1	0	3.0927	1	TEST
181	a-Methyl phenylacetaldehyde	0	0.157465	0	0.0288889	0.0288889	0	10.3053	0	0	0	0	0	0	3.83284	1	TEST
183	Benzene-1,3,4-tricarboxylic anhydride	1	0.493776	3	0	-1.15283	0	11.0148	0	0	0	0	0	0	3.40004	1	TEST
185	Benzyl Bromide	0	0.0681483	0	0	0.952222	0	3.35745	0	0	0	0	0	0	3.44259	1	TEST
187	Diglycidyl ether of Bisphenol A	0	0.648677	0	0.280859	-0.0870366	0	5.71854	1	0	0	0	1	1	4.56147	1	TEST
189	b-Phenylcinnamaldehyde	0	0.170985	0	0	0.828704	0	10.6855	0	0	0	0	0	0	3.52813	1	TEST
191	Bromododecane	0	-0.000213562	0	0	1.18403	0	3.46066	0	0	0	0	1	0	2.79765	1	TEST
193	Bromoheptadecane	0	-0.000213562	0	0	1.18577	0	3.48707	0	0	0	0	1	0	2.78024	1	TEST
195	Bromohexane	0	-0.000213562	0	0	1.17361	0	3.37954	0	0	0	0	0	0	3.0912	1	TEST
197	Bromopentadecane	0	-0.000213562	0	0	1.18528	0	3.47848	0	0	0	0	1	0	2.77644	1	TEST
199	Bromotridecane	0	-0.000213562	0	0	1.18454	0	3.46744	0	0	0	0	1	0	2.786	1	TEST
201	Butyl acrylate	0	0.10594	1	0	-0.330139	0	10.3463	0	0	0	0	0	0	2.8705	1	TEST
203	C11-azlactone	1	0.440321	2	0	-0.658124	0	11.4298	0	0	0	1	1	1	3.1312	1	TEST
205	Chlorotetradecane	0	-0.000213562	0	0	0.844671	0	5.62448	0	0	0	0	1	0	2.72971	1	TEST
207	Cinnamic aldehyde	0	0.0681483	0	0	0.770833	0	9.89137	0	0	0	0	0	0	3.174	1	TEST
209	Clorohexadecane	0	-0.000213562	0	0	0.845269	0	5.64421	0	0	0	0	1	0	2.7335	1	TEST
211	Diethyl sulfate	0	0.29268	0	0	-3.68171	0	10.3861	0	0	0	0	0	0	3.79914	1	TEST
213	Diethylenetriamine	0	-0.000213562	0	0	0.694444	0	5.16597	0	0	0	0	0	0	2.97737	1	TEST
215	Dinocap	0	0.689032	1	-0.223276	-0.765301	0	11.8146	0	0	1	1	1	1	3.79426	1	TEST
217	Dodecyl methanesulfonate	0	0.35334	0	0	-3.23438	0	10.6694	0	0	0	0	1	1	2.96876	1	TEST
219	Ethyl acrylate	0	0.10594	1	0	-0.358796	0	10.0715	0	0	0	0	0	0	2.88524	1	TEST
221	Ethylene dimethacrylate	0	0.466735	2	0	-0.489469	0	10.8416	1	0	0	0	1	0	3.10399	1	TEST
223	Eugenol	0	0.225613	0	0	0.171585	0	9.25235	1	0	0	0	0	0	3.17587	1	TEST
225	Hydroxycitronellal	0	0.459493	0	0.462824	-0.554664	0	10.1259	0	0	0	0	0	0	3.29667	1	TEST
227	Iodohexadecane	0	-0.000213562	0	0	1.34305	0	2.48271	0	0	0	0	1	0	2.8627	1	TEST
229	Iodotetradecane	0	-0.000213562	0	0	1.34245	0	2.47765	0	0	0	0	1	0	2.87694	1	TEST
231	Isononanoyl chloride	0	0.288102	1	0.779355	-0.199494	0	10.3062	0	0	0	0	0	0	3.06719	1	TEST
233	Isopropyl myristate	0	0.250098	1	0.0279706	-0.0361813	0	11.2916	0	0	0	0	1	1	2.65994	1	TEST
235	Limonene	0	0.301623	0	0.767315	0.767315	0	3.97457	0	0	0	0	0	0	3.38436	1	TEST
237	Linoleic acid	0	0.143944	1	0	-0.670665	0	10.3186	0	0	0	0	1	1	2.88526	1	TEST
239	Methyl acrylate	0	0.10594	1	0	-0.393519	0	9.84028	0	0	0	0	0	0	2.88048	1	TEST
241	Methyl methacrylate	0	0.233261	1	0	-0.347222	0	10.1898	0	0	0	0	0	0	2.85954	1	TEST
243	N-(4-Methoxyphenyl)-3-oxobutanamide	0	0.386608	1	0	-0.298457	0	11.2141	0	1	1	1	1	1	3.03768	1	TEST
245	Norbornene fluoroalcohol	2	0.187822	0	0.713657	0.630787	0	11.598	0	0	0	0	0	0	5.43035	1	TEST
247	Oleic acid	0	0.143944	1	0	-0.664234	0	10.3241	0	0	0	0	1	1	2.74633	1	TEST
249	Palmitoyl chloride	0	0.143944	1	0	-0.18234	0	10.5105	0	0	0	0	1	1	2.86997	1	TEST
251	Resorcinol	0	0.212306	0	0	0.087963	0	8.65306	0	0	0	0	0	0	2.40873	1	TEST
253	Undecylenic acid	0	0.143944	1	0	-0.674391	0	10.1623	0	0	0	0	1	1	2.65959	1	TEST
255	(2E)-2-[(2-Formyl- 4-hydroxyphenyl)- methylidene]-butanedioic acid	0	0.565241	2	0	-1.37285	0	10.8366	0	0	0	0	0	0	3.47407	1	TEST
257	(3-Endo)-8-methyl- 8-azabicyclo[3,2,1]- octan-3-ol	1	0.315143	0	-0.00583333	-0.00583333	0	9.38111	0	1	0	0	0	0	4.10248	1	TEST
259	1-(p-methoxyphenyl)-1- penten-3-one	0	0.24245	0	0	0.139646	0	10.9967	0	0	0	0	1	0	3.38403	1	TEST
261	1,2-Diaminocyclohexane	0	0.19547	0	0.28125	0.28125	0	5.65324	0	0	0	0	0	0	3.34594	1	TEST
263	1,4-Dihydroquinone	0	0.212306	0	0	0.169259	0	8.64556	0	0	0	0	0	0	2.37393	1	TEST
265	1-Chloromethyl- pyrene	0	0.376659	0	0	0.563659	0	6.04921	0	0	0	0	0	0	3.28679	1	TEST
267	1-Phenyl-2-methylbutane-1,3-dione	0	0.374102	0	-0.525556	-0.525556	0	11.5653	0	0	0	0	0	0	3.57977	1	TEST
269	2-(4-tert-Amylcyclohexyl)acetaldehyde	0	0.402316	0	0.691117	0.5061	0	10.4077	0	0	0	0	0	0	3.00825	1	TEST
271	2,2-bis-[4-(2-hydroxy-3methacryloxypropoxy)phenyl)]-propane	0	1.19121	2	-0.951275	-0.951275	0	11.4032	1	0	0	0	1	1	4.52534	1	TEST
273	2,4-Dichloro-pyrimidine	0	0.212306	0	0	0.178241	3.60988	5.40941	0	0	0	0	0	0	3.73702	1	TEST
275	2,4-Heptadienal	0	-0.000213562	0	0	0.763889	0	9.64731	0	0	0	0	0	0	3.32326	1	TEST
277	2,6,6-Trimethyl-1,3-cyclohexadiene-1-carbaldehyde	0	0.423485	0	0	0.0422454	0	10.6942	0	0	0	0	0	0	3.3935	1	TEST
279	2-Amino-6-chloro- 4-nitrophenol	0	0.480255	0	0	-0.637222	0	10.2264	0	0	1	0	0	0	3.19495	1	TEST
281	2-Bromotetra-decanoic acid	0	0.233261	1	-0.350422	-0.735255	0	10.5438	0	0	0	0	1	1	3.31196	1	TEST
283	2-Methyl-4H-3,1-benzoxazin-4-one	0	0.315143	2	0	-0.321204	0	11.1929	0	1	0	0	0	0	3.49328	1	TEST
285	3, 3', 4', 5-Tetrachloro-salicylanilide	0	0.706082	1	0	-0.564547	0	12.0711	0	1	0	0	1	0	3.22914	1	TEST
287	3-Aminomethyl- 3,5,5-trimethylcyclohexyl amine	0	0.631279	0	0.349352	0.278935	0	6.00597	0	0	0	0	0	0	3.70348	1	TEST
289	3-Chloro-4-fluorobenzoylchloride	0	0.390939	1	0	-0.646389	0	12.4758	0	0	0	0	0	0	3.61645	1	TEST
291	3-Methyl-4-phenyl-1,2,5-thiadiazole-1,1-dioxide	1	0.501883	0	0	-3.55438	0	11.0653	0	0	0	1	0	0	4.17229	1	TEST
293	3-Phenylene-diamine	0	0.212306	0	0	0.712963	0	5.37861	0	0	0	0	0	0	2.57798	1	TEST
295	4-(Bromomethyl)- benzoic acid ethyl ester	0	0.225613	1	0	-0.260535	0	11.2104	0	0	0	0	0	0	3.81699	1	TEST
297	4(or3)-(4-hydroxy-4-methylphenyl)-3-cyclohexen-1-carboxyaldehyde	0	0.48985	0	0.252808	-0.541113	0	10.5498	0	0	0	0	1	1	3.51252	1	TEST
299	4-Amino-3- nitrophenyl thiocyanate	0	0.352934	1	0	-0.572651	0	10.4116	0	1	0	1	0	0	3.55051	1	TEST
301	4-Chloro-6- iodoquinazoline	0	0.315143	0	0	0.512515	4.08426	5.87457	0	0	0	0	0	0	3.7853	1	TEST
303	4-isopropenyl-1-methyl-6-methylene-cyclohexene	0	0.390939	0	0.64463	0.64463	0	4.01843	0	0	0	0	0	0	3.72924	1	TEST
305	5,5-Dimethyl-3-methylenedihydro-2(3H)-furanone	1	0.488363	1	0	-0.311343	0	10.6679	0	0	0	0	0	0	3.06086	1	TEST
307	5-Chloro-2,6- dimethoxy-4- methyl-8- nitroquinoline	0	0.596399	0	0	-0.520772	4.10809	11.1314	0	1	1	1	1	0	4.01225	1	TEST
309	5-Methoxy-6-trifluoromethyl-2,3-dihydro-1H-indole	1	0.565813	0	0	-4.37039	0	12.596	0	0	1	1	0	0	3.45421	1	TEST
311	6-[(2-Methyl-3-pyridinyl)oxy]-3-pyridinamine	0	0.33198	0	0	0.514167	4.11537	5.53495	0	0	1	1	0	0	3.62255	1	TEST
313	7,12-Dimethyl-benz[a]anthracene	0	0.487143	0	0	1.31739	0	2.27028	0	0	0	0	1	0	3.26464	1	TEST
315	7-Bromotetradecane	0	0.10594	0	0.787947	0.787947	0	3.79917	0	0	0	0	1	0	3.28249	1	TEST
317	Abietic acid	0	0.884635	1	0.286111	-0.58843	0	11.942	0	0	0	0	1	1	4.02967	1	TEST
319	a-Terpinene	0	0.301623	0	0.740139	0.740139	0	2.28125	0	0	0	0	0	0	3.11201	1	TEST
321	Bandrowski's base	0	0.66396	0	0	0.302595	0	8.20483	0	0	0	1	1	0	3.72898	1	TEST
323	Benzo[a]pyrene	0	0.428184	0	0	1.31795	0	2.30907	0	0	0	0	1	0	2.82276	1	TEST
325	beta-Propiolactone	0	0.106153	1	0	-0.0648148	0	9.67708	0	0	0	0	0	0	2.9711	1	TEST
327	C15-azlactone	1	0.440321	2	0	-0.660841	0	11.5033	0	0	0	1	1	1	3.10432	1	TEST
329	C6-azlactone	1	0.440321	2	0	-0.652689	0	11.2583	0	0	0	1	1	0	3.28007	1	TEST
331	Carvoxime	0	0.352934	0	0.473519	0.473519	0	10.4009	0	0	0	0	0	0	4.00808	1	TEST
333	Clotrimazole	1	0.42663	0	0	-0.585949	4.31417	6.69147	0	0	0	1	0	0	3.69544	1	TEST
335	Diethyl maleate	0	0.212093	2	0	-0.536525	0	10.635	0	0	0	0	1	0	2.97116	1	TEST
337	Dimethyl Sulfate	0	0.29268	0	0	-3.65741	0	9.92361	0	0	0	0	0	0	3.67011	1	TEST
339	Endo-tropine-3- mesylate	1	0.630692	0	-0.084537	-3.27882	0	10.9789	0	1	0	1	0	0	4.52364	1	TEST
341	1-(Prop-2-enoyloxy)-2-[(prop-2-enoyloxy)methyl]pentan-3-yl prop-2-enoate	0	0.437706	3	-0.578027	-0.61116	0	11.286	0	0	0	0	1	0	3.71787	1	TEST
343	Farnesal	0	0.356251	0	0	0.86183	0	10.2192	0	0	0	0	1	1	3.24751	1	TEST
345	Glutaraldehyde	0	-0.000213562	0	0	0.512639	0	9.56375	0	0	0	0	0	0	3.43814	1	TEST
347	Glyoxal	0	-0.000213562	0	0	0.194444	0	8.80556	1	0	0	0	0	0	3.6012	1	TEST
349	Imidazolidinyl urea	2	0.808705	2	-1.42811	-1.42811	0	11.6886	0	1	1	1	1	1	4.7613	1	TEST
351	5-(prop-1-en-1-yl)-2-(propan-2-yloxy)phenol	0	0.331766	0	0.158766	0.158766	0	5.62025	1	0	0	0	1	0	3.29701	1	TEST
353	Linolenic acid	0	0.143944	1	0	-0.67484	0	10.3149	0	0	0	0	1	1	3.02362	1	TEST
355	Methyl dodecanesulfonate	0	0.29268	0	0	-3.22718	0	11.0126	0	0	0	0	1	1	2.99305	1	TEST
357	Methyl methanesulfonate	0	0.35334	0	0	-3.16204	0	9.77778	0	0	0	0	0	0	3.27435	1	TEST
359	Methyl(2-sulfomethyl)octadecanoate	0	0.510805	1	-0.757105	-4.14864	0	11.5569	0	0	0	0	1	1	3.41845	1	TEST
361	N-(3,4-Dichlorophenyl)-n'- (1-methylethyl)- imidodicarbon-imidic diamide monohydrochloride	0	0.675725	0	-0.0923406	-0.192074	0	7.88626	0	0	0	1	0	0	3.41588	1	TEST
363	N-Ethyl-N-nitrosourea	0	0.195256	0	0	-0.81713	0	10.016	0	1	0	0	0	0	3.55453	1	TEST
365	N-Methyl-N-nitrosourea	0	0.233261	0	0	-0.851852	0	9.78472	0	1	0	0	0	0	3.63679	1	TEST
367	Oripavine	1	0.680131	0	-0.142546	-0.153843	0	10.3028	1	0	1	1	0	0	5.34559	1	TEST
369	2,3-Dihydro-1,3-oxazol-2-one	1	0.106153	0	0	-0.407407	0	9.84722	0	0	0	0	0	0	3.48446	1	TEST
371	Pentachlorophenol	0	0.535898	0	0	-0.36321	0	9.20099	0	0	0	0	0	0	3.56504	1	TEST
373	Phenylacetaldehyde	0	0.0681483	0	0	0.528611	0	9.97426	0	0	0	0	0	0	3.24509	1	TEST
375	p-tert-Butyl-a-ethyl-hydrocinnamal	0	0.56913	0	0.116191	0.116191	0	10.5354	0	0	0	0	0	0	4.22705	1	TEST
377	Pyridine	0	0	0	0	1.75	3.78472	3.78472	0	0	0	0	0	0	2.48627	1	TEST
379	(3R,3aS,6aR)-Hexahydrofuro[2,3-b]furan-3-yl 4-nitrophenyl carbonate	2	0.54097	0	-0.386066	-0.856479	0	11.7011	1	0	1	1	1	1	4.24533	1	TEST
381	Sodium lauroyl lactylate	0	0.534883	3	-1.25372	-1.25372	0	11.6384	1	0	0	0	1	1	3.54768	1	TEST
383	Squalene	0	0.712715	0	0	1.17065	0	2.43395	0	0	0	0	1	0	3.4129	1	TEST
385	Trifluralin	0	0.871554	0	0	-4.90834	0	12.8448	0	1	1	1	0	0	3.29795	1	TEST
387	Vinylpyridine	0	0.0681483	0	0	1.11111	3.84556	3.84556	0	0	0	0	0	0	2.9028	1	TEST
393	3-Methyl catechol	0	0.284786	0	0	-0.0601852	0	8.9563	1	0	0	0	0	0	3.1025	1	TEST
395	4-Carboxyphenylacetate	0	0.407776	2	0	-1.01215	0	10.4181	0	0	0	0	0	0	3.45609	1	TEST
397	Benzoyl peroxide	0	0.315143	2	0	-0.708443	0	11.481	1	0	0	0	1	0	3.47282	1	TEST
399	Disperse Violet 1 (1,4-diamino-9,10-anthracenedione)	0	0.562939	0	0	-0.24537	0	12.3388	0	1	1	1	0	0	3.61442	1	TEST
401	Maleic anhydride	1	0.212306	2	0	-0.578704	0	9.92361	0	0	0	0	0	0	3.04858	1	TEST
403	Phthalic anhydride	1	0.298306	2	0	-0.55037	0	10.8329	0	0	0	0	0	0	3.31619	1	TEST
405	Squaric acid	0	0.357266	0	0	-1.01157	0	9.95435	1	0	0	0	0	0	3.63898	1	TEST

## Sheet: Dataset 2
No.	Names	X3A	ETA_Psi_1	MLOGP2	MLOGP	B03[O-O]	B09[C-C]	B02[O-S]	ETA_Beta	Observed Class	Set
2	1-Naphthylacetic acid	0.18	0.588	7.785	2.79	0	0	0	19.5	0	TRAIN
3	2,4,6,8-Tetramethyl-1,3,5,7-tetraoxacyclooctane	0.201	0.465	0.963	0.981	0	0	0	8	0	TRAIN
4	2,4-D	0.207	0.503	5.543	2.354	1	0	0	17	1	TRAIN
5	2-Phenylphenol	0.193	0.642	9.778	3.127	0	0	0	19.75	1	TRAIN
7	6-Benzyladenine	0.186	0.576	4.775	2.185	0	1	0	27.5	0	TRAIN
9	Acequinocyl	0.186	0.588	31.721	5.632	1	1	0	27.75	0	TRAIN
11	Aclonifen	0.192	0.52	5.929	2.435	0	0	0	27.75	1	TRAIN
12	Acrinathrin	0.177	0.447	16.747	4.092	0	1	0	43.75	0	TRAIN
13	Ametoctradin	0.186	0.594	20.638	4.543	0	1	0	22	0	TRAIN
15	Aminopyralid	0.194	0.487	0.643	0.802	0	0	0	16.75	0	TRAIN
16	Amisulbrom	0.172	0.525	7.307	2.703	0	1	0	36.75	0	TRAIN
17	Asulam Sodium	0.204	0.476	0.067	-0.258	0	0	0	19.5	0	TRAIN
20	Azoxystrobin	0.187	0.533	10.038	3.168	0	1	0	44.5	1	TRAIN
22	Benfluralin	0.176	0.417	9.503	3.083	0	1	0	27	0	TRAIN
23	Benfuracarb	0.188	0.543	5.08	2.254	1	1	0	27	1	TRAIN
24	Bifenox	0.189	0.5	10.027	3.167	0	1	0	32	0	TRAIN
25	Bitertanol	0.188	0.586	16.721	4.089	1	1	0	33	0	TRAIN
26	Bromuconazole	0.173	0.62	17.309	4.16	0	0	0	25.25	0	TRAIN
27	Bupirimate	0.195	0.527	6.626	2.574	0	1	0	22.75	0	TRAIN
28	Buprofezin	0.174	0.612	8.75	2.958	0	1	0	22.25	0	TRAIN
30	Carbetamide	0.215	0.52	1.244	1.115	1	1	0	20	1	TRAIN
31	Chlorantraniliprole	0.177	0.587	9.856	3.139	0	1	0	40.25	0	TRAIN
32	Chloridazon	0.194	0.551	3.809	1.952	0	0	0	20	0	TRAIN
33	Chlormequat chloride	0.25	0.604	4.397	-2.097	0	0	0	4.25	1	TRAIN
35	Cycloxydim	0.182	0.584	5.279	2.298	0	1	0	17.25	0	TRAIN
36	Cymoxanil	0.222	0.445	1.722	-1.312	0	1	0	18	0	TRAIN
38	Cyromazine	0.186	0.5	1.488	1.22	0	0	0	16.5	0	TRAIN
39	Dazomet	0.22	0.651	0.039	0.198	0	0	0	7.5	1	TRAIN
41	Dicamba	0.183	0.503	6.877	2.622	0	0	0	17	0	TRAIN
42	Dichlobenil	0.203	0.607	8.735	2.956	0	0	0	15.75	1	TRAIN
43	Diclofop-methyl	0.204	0.542	13.399	3.66	1	1	0	29.25	0	TRAIN
44	Dicloran	0.204	0.487	4.024	2.006	0	0	0	18	0	TRAIN
45	Diethofencarb	0.192	0.521	3.485	1.867	1	1	0	20.75	0	TRAIN
46	Diflubenzuron	0.193	0.489	12.307	3.508	0	1	0	30.25	0	TRAIN
50	Dimoxystrobin	0.192	0.568	8.396	2.898	0	1	0	30	1	TRAIN
51	Diquat dibromide	0.174	0.642	4.504	2.122	0	0	0	21.5	1	TRAIN
52	Dithianon	0.17	0.601	1.735	1.317	0	0	0	31.5	1	TRAIN
54	Epoxiconazole	0.169	0.555	19.323	4.396	0	1	0	33.25	0	TRAIN
56	Ethametsulfuron methyl metabolite (IN-D5119)	0.18	0.473	0.033	0.18	0	0	0	17.25	0	TRAIN
58	Etoxazole	0.174	0.543	24.78	4.978	0	1	0	31	0	TRAIN
59	Etridiazole	0.192	0.538	4.297	2.073	0	0	1	13.5	1	TRAIN
60	Famoxadone	0.181	0.56	10.633	3.261	1	1	0	39.75	1	TRAIN
66	Florasulam	0.176	0.433	6.683	2.585	0	1	0	36.5	0	TRAIN
67	Fluazifop-P-butyl	0.201	0.47	14.936	3.865	1	1	0	31.5	0	TRAIN
68	Fluazifop-butyl	0.201	0.47	14.936	3.865	1	1	0	31.5	0	TRAIN
69	Fluazinam	0.17	0.381	11.37	3.372	0	1	0	39	0	TRAIN
70	Flubendiamide	0.17	0.473	24.235	4.923	0	1	0	42.25	0	TRAIN
71	Flufenoxuron	0.184	0.439	20.381	4.514	0	1	0	45.25	0	TRAIN
72	Fluometuron	0.202	0.434	6.348	2.52	0	0	0	18.25	0	TRAIN
74	Flupyradifurone	0.192	0.472	2.691	1.64	0	0	0	22.25	1	TRAIN
75	Flupyrsulfuron-methyl-sodium	0.183	0.414	1.372	1.171	0	1	0	40.25	0	TRAIN
76	Fluquinconazole	0.169	0.53	23.489	4.847	0	1	0	39	0	TRAIN
78	Flutolanil	0.181	0.488	17.465	4.179	0	1	0	28.5	0	TRAIN
79	Flutriafol	0.18	0.516	16.333	4.041	0	0	0	32	0	TRAIN
82	Fuberidazole	0.178	0.584	3.303	1.817	0	0	0	23.5	0	TRAIN
83	Gamma-cyhalothrin	0.182	0.509	17.784	4.217	0	1	0	37.5	0	TRAIN
85	Gibberellin A7	0.141	0.541	7.298	2.701	0	0	0	20.5	0	TRAIN
86	Glufosinate-ammonium	0.249	0.477	8.68	-2.946	0	0	0	9.25	0	TRAIN
87	Glyphosate	0.244	0.414	3.84	-1.96	0	0	0	9.25	0	TRAIN
88	Hymexazol	0.217	0.449	0.006	-0.075	1	0	0	7.5	1	TRAIN
89	Imazalil	0.192	0.589	9.855	3.139	0	0	0	25.25	1	TRAIN
90	Imidacloprid	0.192	0.489	1.115	1.056	0	0	0	22.75	1	TRAIN
93	Lasalocid sodium	0.183	0.553	13.052	3.613	1	1	0	34	1	TRAIN
94	Lenacil	0.172	0.56	4.96	2.227	0	0	0	15.75	0	TRAIN
95	Lufenuron	0.186	0.392	18.643	4.318	0	1	0	39	0	TRAIN
96	Malathion	0.22	0.53	0.241	0.491	0	1	1	16.5	1	TRAIN
97	Mandestrobin	0.193	0.58	7.198	2.683	1	1	0	27.75	1	TRAIN
99	Metaflumizone	0.19	0.456	20.097	4.483	0	1	0	47.5	0	TRAIN
100	Metalaxyl-M	0.189	0.529	3.636	1.907	1	0	0	21.75	1	TRAIN
101	Metamitron	0.194	0.539	3.843	1.96	0	0	0	19.75	1	TRAIN
103	Metconazole	0.181	0.595	18.069	4.251	0	1	0	25.25	0	TRAIN
104	Methomyl	0.283	0.5	0.003	0.057	0	0	0	9	1	TRAIN
105	Metosulam	0.178	0.506	8.343	2.888	0	1	0	37.75	0	TRAIN
106	Metribuzin	0.188	0.544	2.556	1.599	0	0	0	12.75	1	TRAIN
108	Napropamide	0.192	0.6	9.613	3.101	1	1	0	24	1	TRAIN
109	Nicosulfuron	0.186	0.474	0.155	0.394	0	1	0	38.25	0	TRAIN
110	Orthosulfamuron	0.19	0.48	3.464	1.861	0	1	0	39	0	TRAIN
111	Oxadiazon	0.175	0.54	16.237	4.03	0	1	0	24.5	0	TRAIN
112	Oxamyl	0.238	0.482	0.214	-0.463	0	0	0	13.5	1	TRAIN
113	Oxasulfuron	0.18	0.496	0.707	0.841	1	1	0	36.5	0	TRAIN
115	Oxyfluorfen	0.183	0.445	12.722	3.567	0	1	0	31.75	0	TRAIN
116	Pencycuron	0.193	0.618	16.001	4	0	1	0	28.75	0	TRAIN
117	Penflufen	0.181	0.564	16.073	4.009	0	1	0	27.25	0	TRAIN
118	Penoxsulam	0.168	0.409	7.591	2.755	0	1	0	41.5	0	TRAIN
120	Phosalone	0.181	0.579	2.74	1.655	0	1	1	23.75	1	TRAIN
121	Picloram	0.197	0.49	1.252	1.119	0	0	0	18	0	TRAIN
124	Prohexadione-calcium	0.189	0.465	0.191	-0.437	0	0	0	14.75	0	TRAIN
126	Propargite	0.193	0.579	10.661	3.265	1	1	0	24.25	1	TRAIN
127	Proquinazid	0.178	0.657	15.101	3.886	0	1	0	21.5	0	TRAIN
128	Prosulfocarb	0.212	0.643	9.536	3.088	0	1	1	17	1	TRAIN
129	Prosulfuron	0.185	0.443	7.523	2.743	0	1	0	35.5	0	TRAIN
130	Pymetrozine	0.204	0.525	0.265	0.514	0	1	0	21	0	TRAIN
131	Pyridalyl	0.195	0.485	20.169	4.491	0	1	0	34.75	0	TRAIN
132	Pyrimethanil	0.194	0.615	6.272	2.504	0	0	0	22	1	TRAIN
133	Pyriproxyfen	0.202	0.585	12.782	3.575	1	1	0	34.5	0	TRAIN
136	Quinoclamine	0.184	0.546	3.738	1.933	0	0	0	19	1	TRAIN
137	Quizalofop	0.192	0.531	7.616	2.76	1	1	0	34.75	1	TRAIN
138	Quizalofop-P-ethyl	0.192	0.543	10.366	3.22	1	1	0	36	1	TRAIN
139	Quizalofop-P-tefuryl	0.193	0.539	7.426	2.725	1	1	0	39	1	TRAIN
140	Spiromesifen	0.161	0.584	17.68	4.205	1	1	0	26.5	0	TRAIN
141	Spirotetramat	0.171	0.543	4.891	2.212	0	1	0	27.5	0	TRAIN
142	Spiroxamine	0.185	0.605	10.798	3.286	0	1	0	12.75	0	TRAIN
143	Sulcotrione	0.18	0.524	1.974	1.405	0	1	0	25.75	0	TRAIN
144	Sulfoxaflor	0.194	0.452	2.874	1.695	0	0	0	23.5	1	TRAIN
145	Tau-fluvalinate	0.188	0.518	23.14	4.81	0	1	0	45.5	0	TRAIN
146	Tebuconazole	0.196	0.591	16.106	4.013	0	1	0	24.25	0	TRAIN
148	Tebufenpyrad	0.185	0.6	11.907	3.451	0	1	0	26.75	1	TRAIN
149	Teflubenzuron	0.19	0.442	15.912	3.989	0	1	0	34	0	TRAIN
150	Tetraconazole	0.198	0.444	18.329	4.281	0	0	0	27.25	1	TRAIN
151	Thiencarbazone-methyl	0.178	0.464	0.765	0.875	0	1	0	30.25	0	TRAIN
155	Tri-allate	0.21	0.593	9.069	3.012	0	0	1	12.25	1	TRAIN
157	Triazoxide	0.177	0.524	4.893	2.212	0	0	0	28.25	0	TRAIN
158	Trichlorfon	0.22	0.486	0.239	0.489	1	0	0	9.25	1	TRAIN
159	Tricyclazole	0.164	0.618	5.727	2.393	0	0	0	20.75	0	TRAIN
161	Triflusulfuron-methyl	0.181	0.433	6.045	2.459	0	1	0	41.5	0	TRAIN
162	Triticonazole	0.181	0.595	17.375	4.168	0	1	0	26.75	0	TRAIN
163	Valiphenal	0.198	0.524	5.269	2.295	0	1	0	27.5	0	TRAIN
No.	Names	X3A	ETA_Psi_1	MLOGP2	MLOGP	B03[O-O]	B09[C-C]	B02[O-S]	ETA_Beta	Observed Class	Set
*1	1,3-Dichloropropene	0.354	0.601	4.332	2.081	0	0	0	4	1	TEST
*10	Acetochlor	0.191	0.577	10.127	3.182	0	0	0	18.75	1	TEST
*102	Metazachlor	0.188	0.58	6.896	2.626	0	0	0	25	0	TEST
*107	Metsulfuron-methyl	0.185	0.472	2.778	1.667	0	1	0	36	0	TEST
*114	Oxydemeton-methyl	0.259	0.56	0.001	0.028	0	0	1	10.75	1	TEST
*119	Penthiopyrad	0.174	0.502	11.907	3.451	0	1	0	26.75	0	TEST
*122	Pinoxaden	0.17	0.564	15.945	3.993	0	1	0	28.5	0	TEST
*123	Prochloraz	0.192	0.551	11.375	3.373	0	1	0	30	0	TEST
*125	Propanil	0.218	0.572	9.459	3.076	0	0	0	16.75	1	TEST
*134	Pyroxsulam	0.167	0.423	6.392	2.528	0	1	0	40	0	TEST
*135	Quinmerac	0.174	0.555	6.202	2.49	0	0	0	21.25	0	TEST
*14	Amidosulfuron	0.196	0.438	0.054	0.232	0	1	0	29.25	0	TEST
*147	Tebufenozide	0.187	0.607	22.663	4.761	0	1	0	29.75	0	TEST
*152	Tolylfluanid	0.191	0.528	8.134	2.852	0	0	0	20.25	0	TEST
*153	Topramezone	0.173	0.513	4.446	2.108	0	1	0	32.75	0	TEST
*154	Tralkoxydim	0.175	0.585	7.486	2.736	0	1	0	24.25	0	TEST
*156	Triasulfuron	0.186	0.489	3.641	1.908	0	1	0	35	0	TEST
*160	Trifluralin	0.173	0.417	9.503	3.083	0	0	0	27	0	TEST
*164	Zoxamide	0.204	0.568	13.831	3.719	0	1	0	21.75	0	TEST
*18	Azadirachtin A	0.143	0.476	0.036	0.189	1	1	0	44.25	0	TEST
*19	Azimsulfuron	0.176	0.458	1.991	1.411	0	1	0	41.75	0	TEST
*21	Benalaxyl-M	0.189	0.585	13.285	3.645	0	1	0	29.75	1	TEST
*29	Carbendazim	0.191	0.508	1.106	1.052	0	0	0	20.25	1	TEST
*34	Chromafenozide	0.177	0.59	18.275	4.275	0	1	0	32.25	0	TEST
*37	Cyprodinil	0.182	0.626	9.24	3.04	0	1	0	23.5	1	TEST
*40	Diazinon	0.19	0.585	5.921	2.433	0	1	1	20.25	1	TEST
*47	Diflufenican	0.185	0.451	17.979	4.24	0	1	0	39.5	0	TEST
*48	Dihydroxychloroquin oxalin	0.187	0.51	2.783	1.668	0	0	0	20.25	0	TEST
*49	Dimethomorph	0.188	0.562	6.922	2.631	1	1	0	33.75	0	TEST
*53	Dodine	0.26	0.621	16.058	4.007	0	1	0	10	1	TEST
*55	Ethametsulfuron methyl	0.185	0.474	2.598	1.612	0	1	0	38	1	TEST
*57	Ethoprophos	0.223	0.669	4.244	2.06	0	0	1	8.75	1	TEST
*61	Fenamiphos (aka phenamiphos)	0.19	0.606	14.039	3.747	0	1	0	19.75	1	TEST
*62	Fenazaquin	0.186	0.63	23.606	4.859	0	1	0	30.5	1	TEST
*63	Fenhexamid	0.197	0.572	11.818	3.438	0	1	0	21	0	TEST
*64	Fenoxaprop-P-ethyl	0.19	0.525	12.066	3.474	1	1	0	34.5	0	TEST
*65	Fenpropimorph	0.189	0.648	14.642	3.827	0	1	0	18.75	0	TEST
*73	Fluopyram	0.184	0.426	17.058	4.13	0	1	0	30.5	0	TEST
*77	Fluroxypyr	0.204	0.436	1.682	1.297	1	0	0	20	1	TEST
*8	Abamectin	0.174	0.53	3.051	1.747	1	1	0	47.5	1	TEST
*80	Folpet	0.17	0.553	6.62	2.573	0	0	0	19.25	0	TEST
*81	Formetanate hydrochloride	0.213	0.529	2.275	1.508	0	0	0	20.5	0	TEST
*84	Gibberellin A4	0.141	0.541	7.794	2.792	0	0	0	19.5	0	TEST
*91	Ipconazole	0.178	0.6	20.099	4.483	0	1	0	25.75	1	TEST
*92	Isoxaben	0.187	0.539	6.763	2.601	0	1	0	29	0	TEST
*98	Mepiquat chloride	0.221	0.65	4.561	-2.136	0	0	0	5	1	TEST

## Sheet: Dataset 3
No.	Name	ETA_EtaP_B_RC	nAB	nCrs	nRCONHR	S_tsC	Jurs-DPSA-1	Set	Activity
2	Acyclovir	0.02291	5	0	0	0	123.219	TRAIN	1
8	Aspirin	0.03007	6	0	0	0	82.0014	TRAIN	1
29	Cimetidine	0.01327	5	0	0	1.82524	260.052	TRAIN	1
30	Ciprofloxacin	0.02915	6	3	0	0	225.951	TRAIN	1
35	Clozapine	0.02411	12	0	0	0	203.483	TRAIN	1
43	Dieldrin	0.05623	0	4	0	0	-191.553	TRAIN	1
50	Doxorubicin	0.03632	12	7	0	0	293.046	TRAIN	1
56	Flecainide	0.03759	6	4	0	0	39.0365	TRAIN	1
71	Loratadine	0.02182	12	4	0	0	271.695	TRAIN	1
80	Methylphenidate	0.01531	6	4	0	0	275.969	TRAIN	1
93	N-Desmethylsertraline	0.0267	12	3	0	0	79.2418	TRAIN	1
94	Nefopam	0.0173	12	1	0	0	242.137	TRAIN	1
98	Nitrofuranthoin	0.03103	5	0	0	0	-45.7125	TRAIN	1
103	Ofloxacin	0.03378	6	1	0	0	262.332	TRAIN	1
122	Pseudoephedrine	0.02057	6	0	0	0	195.143	TRAIN	1
124	Quazepam	0.03649	12	0	0	0	-95.4389	TRAIN	1
130	Sertraline	0.02347	12	3	0	0	107.657	TRAIN	1
148	Venlafaxine	0.02687	6	5	0	0	398.326	TRAIN	1
151	Zidovudine	0.02758	0	3	0	0	50.144	TRAIN	1
155	p,p’-DDD	0.02837	0	0	0	0	-134.309	TRAIN	1
156	p,p’-DDE	0.02837	12	0	0	0	-150.254	TRAIN	1
157	p,p’-DDT	0.03737	12	0	0	0	-185.85	TRAIN	1
158	o,p’-DDE	0.02743	12	0	0	0	-124.899	TRAIN	1
160	Heptachlor epoxide	0.0586	0	4	0	0	-293.644	TRAIN	1
161	Hexachlorobenzene	0.04466	6	0	0	0	-299.054	TRAIN	1
165	PCB 194	0.04171	0	0	0	0	-380.614	TRAIN	1
166	PCB 199	0.04171	0	0	0	0	-385.854	TRAIN	1
167	PCB 180	0.04009	0	0	0	0	-343.055	TRAIN	1
168	PCB 170	0.03921	0	0	0	0	-319.027	TRAIN	1
170	PCB 156	0.03736	0	0	0	0	-277.457	TRAIN	1
171	PCB 153	0.03829	0	0	0	0	-302.961	TRAIN	1
172	PCB 138	0.03736	0	0	0	0	-280.04	TRAIN	1
173	PCB 74	0.03192	0	0	0	0	-171.469	TRAIN	1
174	PCB 146	0.03829	0	0	0	0	-299.666	TRAIN	1
175	PCB 99	0.03529	0	0	0	0	-238.78	TRAIN	1
176	PCB 52	0.03192	0	0	0	0	-175.99	TRAIN	1
178	PCB 202	0.04171	0	0	0	0	-395.25	TRAIN	1
179	Tetrachloroethylene	0.04521	0	0	0	0	-241.052	TRAIN	1
181	Desmethylcitalopram	0.02088	12	0	0	2.16842	170.928	TRAIN	1
1	Acetazolamide	0.0467	5	0	1	0	-38.3587	TRAIN	0
3	Alprazolam	0.02368	17	0	0	0	62.6684	TRAIN	0
5	Amoxycillin	0.04165	6	2	1	0	115.499	TRAIN	0
7	Ampicillin	0.03897	6	2	1	0	161.456	TRAIN	0
11	Aztreonam	0.04762	5	2	1	0	32.4657	TRAIN	0
17	Carbamazepine	0.02229	12	0	0	0	111.018	TRAIN	0
18	Carbamazepine10,11-epoxide	0.02564	12	2	0	0	120.16	TRAIN	0
19	Carbenicillin	0.0394	6	2	1	0	94.7499	TRAIN	0
20	Cefotaxime	0.03109	5	1	1	0	166.532	TRAIN	0
22	Ceftriaxone	0.03172	5	1	1	0	124.695	TRAIN	0
23	Cephalexin	0.0316	6	1	1	0	173.49	TRAIN	0
24	Cephalothin	0.03047	5	1	1	0	78.8024	TRAIN	0
25	Chloramphenicol	0.03189	6	0	1	0	-118.115	TRAIN	0
34	Clonazepam	0.02789	12	0	1	0	-43.0575	TRAIN	0
38	Dapsone	0.03459	12	0	0	0	79.2699	TRAIN	0
42	Diazepam	0.02537	12	0	0	0	97.4709	TRAIN	0
51	Doxycycline	0.04348	6	2	0	0	152.083	TRAIN	0
57	Fluconazole	0.02753	16	0	0	0	121.173	TRAIN	0
58	Flunitrazepam	0.02983	12	0	0	0	39.8636	TRAIN	0
59	Fluoxetine	0.02649	12	0	0	0	116.876	TRAIN	0
60	Flurbiprofen	0.02743	12	0	0	0	101.683	TRAIN	0
66	Indomethacin	0.03017	16	0	0	0	96.621	TRAIN	0
68	Lamotrigine	0.03086	12	0	0	0	-22.4028	TRAIN	0
69	Levodopa	0.03551	6	0	0	0	67.9715	TRAIN	0
72	Lorazepam	0.02921	12	0	1	0	-38.5713	TRAIN	0
74	Mefloquine	0.04172	11	4	0	0	-11.2399	TRAIN	0
78	Methotrexate	0.03146	17	0	0	0	181.336	TRAIN	0
83	Metronidazole	0.02801	5	0	0	0	51.4961	TRAIN	0
86	Midazolam	0.02653	17	0	0	0	106.501	TRAIN	0
92	Naproxen	0.0278	11	0	0	0	145.24	TRAIN	0
96	Nitrazepam	0.02496	12	0	1	0	17.0654	TRAIN	0
97	Nitrendipine	0.02981	6	0	0	0	228.06	TRAIN	0
100	Norfluoxetine	0.02775	12	0	0	0	73.5503	TRAIN	0
102	Noscapine	0.02536	12	3	0	0	354.851	TRAIN	0
105	Oxazepam	0.02621	12	0	1	0	14.5793	TRAIN	0
107	Paracetamol	0.02895	6	0	1	0	106.812	TRAIN	0
108	Paroxetine	0.01938	12	1	0	0	229.046	TRAIN	0
109	Pefloxacin	0.03142	6	0	0	0	256.052	TRAIN	0
111	Penicillin V	0.03594	6	2	1	0	121.946	TRAIN	0
115	Phenobarbitone	0.02811	6	0	0	0	62.257	TRAIN	0
116	Phenytoin	0.02316	12	0	0	0	69.7764	TRAIN	0
117	Piroxicam	0.03246	12	0	1	0	53.816	TRAIN	0
120	Propranolol	0.02218	11	0	0	0	255.7	TRAIN	0
123	Pyrimethamine	0.0278	12	0	0	0	153.201	TRAIN	0
127	Rofecoxib	0.03212	12	0	0	0	57.8278	TRAIN	0
132	Sulfamethoxazole	0.03617	11	0	0	0	106.469	TRAIN	0
134	Suprofen	0.02743	11	0	0	0	45.4926	TRAIN	0
135	Temazepam	0.02841	12	0	0	0	68.0847	TRAIN	0
137	Tetracycline	0.04642	6	2	0	0	168.719	TRAIN	0
139	Theophylline	0.0354	5	0	0	0	163.703	TRAIN	0
141	Timolol	0.03003	5	0	0	0	353.949	TRAIN	0
142	Tinidazole	0.03931	5	0	0	0	88.1217	TRAIN	0
143	Tolmetin	0.03158	11	0	0	0	165.822	TRAIN	0
145	Trazodone	0.02133	6	0	0	0	227.094	TRAIN	0
153	Zonisamide	0.03747	10	0	0	0	1.99861	TRAIN	0
154	Zopiclone	0.02653	12	0	0	0	218.649	TRAIN	0
163	PCB 33	0.02697	12	0	0	0	-91.024	TRAIN	0
184	Warfarin	0.02594	12	0	0	0	116.633	TRAIN	0
No.	Name	ETA_EtaP_B_RC	nAB	nCrs	nRCONHR	S_tsC	Jurs-DPSA-1	Set	Activity
6	Amphetamine	0.02594	6	0	0	0	186.563	TEST	1
9	Astemizole	0.02594	22	3	0	0	349.657	TEST	1
10	Atenolol	0.02594	6	0	0	0	278.12	TEST	1
14	Bupropion	0.02594	6	0	0	0	146.213	TEST	1
27	Chloroquine	0.02594	11	0	0	0	296.407	TEST	1
28	Chlorprothixene	0.02594	12	0	0	0	125.184	TEST	1
31	Citalopram	0.02594	12	0	0	2.17756	198.937	TEST	1
33	Clomipramine	0.02594	12	2	0	0	230.235	TEST	1
36	Codeine	0.02594	6	5	0	0	308.791	TEST	1
41	Desmethyldoxepin	0.02594	12	0	0	0	253.255	TEST	1
47	Dothiepin	0.02594	12	0	0	0	248.878	TEST	1
48	Dothiepsulfoxide	0.02594	12	0	0	0	251.587	TEST	1
49	Doxepin	0.02594	12	0	0	0	276.03	TEST	1
55	Fentanyl	0.02594	12	3	0	0	365.186	TEST	1
61	Fluvoxamine	0.02594	6	0	0	0	195.235	TEST	1
63	Hydromorphone	0.02594	6	6	0	0	217.618	TEST	1
67	Labetalol	0.02594	12	0	0	0	230.272	TEST	1
70	Lidocaine	0.02594	6	0	1	0	286.627	TEST	1
75	Mepindolol	0.02594	10	0	0	0	334.286	TEST	1
77	Methimazole	0.02594	0	0	0	0	123.349	TEST	1
84	Mexiletine	0.02594	6	0	0	0	228.391	TEST	1
85	Mianserin	0.02594	12	2	0	0	257.621	TEST	1
88	Mirtazapine	0.02594	12	2	0	0	279.723	TEST	1
90	Morphine	0.02594	6	5	0	0	235.82	TEST	1
91	Nadolol	0.02594	6	4	0	0	306.83	TEST	1
95	Nicotine	0.02594	6	3	0	0	246.348	TEST	1
113	Pethidine	0.02594	6	2	0	0	302.771	TEST	1
119	Procainamide	0.02594	6	0	0	0	295.596	TEST	1
131	Sotalol	0.02594	6	0	0	0	193.094	TEST	1
133	Sumatriptan	0.02594	10	0	0	0	278.666	TEST	1
136	Terbutaline	0.02594	6	0	0	0	200.018	TEST	1
144	Tramadol	0.02594	6	4	0	0	362.271	TEST	1
150	Vigabatrin	0.02594	0	0	0	0	117.405	TEST	1
159	o,p’-DDT	0.02594	12	0	0	0	-158.056	TEST	1
169	PCB 118	0.02594	0	0	0	0	-233.201	TEST	1
177	PCB 114	0.02594	0	0	0	0	-210.344	TEST	1
180	Cannabis	0.02594	6	2	0	0	442.393	TEST	1
182	O-Desmethylvenlafaxine	0.02594	6	5	0	0	329.687	TEST	1
4	Amitriptyline	0.02594	12	2	0	0	306.025	TEST	0
12	Baclofen	0.02594	6	0	0	0	41.6885	TEST	0
13	Bupivacaine	0.02594	6	4	1	0	367.953	TEST	0
15	Caffeine	0.02594	5	0	0	0	216.597	TEST	0
16	Captopril	0.02594	0	3	0	0	141.312	TEST	0
21	Cefoxitin	0.02594	5	1	1	0	106.696	TEST	0
26	Chlormethiazole	0.02594	5	0	0	0	43.4655	TEST	0
32	Clemastine	0.02594	12	3	0	0	277.249	TEST	0
37	Cotinine	0.02594	6	3	0	0	194.77	TEST	0
39	Descarboethoxyloratadine	0.02594	12	4	0	0	217.405	TEST	0
40	Desipramine	0.02594	12	2	0	0	292.591	TEST	0
44	Digoxin	0.02594	0	22	0	0	632.58	TEST	0
45	Diltiazem	0.02594	12	2	0	0	325.51	TEST	0
46	Disopyramide	0.02594	12	0	0	0	346.992	TEST	0
52	Erythromycin	0.02594	0	12	0	0	638.285	TEST	0
53	Ethanol	0.02594	0	0	0	0	115.892	TEST	0
54	Ethosuximide	0.02594	0	1	0	0	112.102	TEST	0
62	Haloperidol	0.02594	12	2	0	0	139.305	TEST	0
64	Ibuprofen	0.02594	6	0	0	0	229.745	TEST	0
65	Imipramine	0.02594	12	2	0	0	320.306	TEST	0
73	Medroxyprogesterone	0.02594	0	7	0	0	304.572	TEST	0
76	Methadone	0.02594	12	0	0	0	315.14	TEST	0
79	Methyldopa	0.02594	6	0	0	0	102.342	TEST	0
81	Metoclopramide	0.02594	6	0	0	0	287.746	TEST	0
82	Metoprolol	0.02594	6	0	0	0	380.514	TEST	0
87	Minoxidil	0.02594	0	3	0	0	259.455	TEST	0
89	Moclobemide	0.02594	6	0	0	0	167.12	TEST	0
99	Norethindron	0.02594	0	8	0	2.73715	275.873	TEST	0
101	Nortriptyline	0.02594	12	2	0	0	279.986	TEST	0
104	Olanzapine	0.02594	11	0	0	0	267.207	TEST	0
106	Oxprenolol	0.02594	6	0	0	0	297.513	TEST	0
110	Penicillin G	0.02594	6	2	1	0	52.0997	TEST	0
112	Perphenazine	0.02594	12	0	0	0	236.183	TEST	0
114	Phenacetine	0.02594	6	0	1	0	212.522	TEST	0
118	Prednisolone	0.02594	0	6	0	0	255.362	TEST	0
121	Propylthiouracil	0.02594	0	0	0	0	90.984	TEST	0
125	Quinapril	0.02594	12	2	0	0	262.643	TEST	0
126	Risperidone	0.02594	10	5	0	0	360.713	TEST	0
128	Rosaramicin	0.02594	0	10	0	0	481.124	TEST	0
129	Roxithromycin	0.02594	0	12	0	0	755.947	TEST	0
138	Theobromine	0.02594	5	0	0	0	149.502	TEST	0
140	Tiapamil	0.02594	12	2	0	0	445.067	TEST	0
146	Triprolidine	0.02594	12	2	0	0	350.612	TEST	0
147	Valproic	0.02594	0	0	0	0	233.585	TEST	0
149	Verapamil	0.02594	12	0	0	2.63451	454.144	TEST	0
152	Zolpidem	0.02594	16	0	0	0	323.885	TEST	0
162	PCB 209	0.02594	12	0	0	0	-478.576	TEST	0
164	PCB 206	0.02594	6	0	0	0	-427.341	TEST	0
183	Estradiol	0.02594	6	7	0	0	284.19	TEST	0
185	Gentamicin	0.02594	0	12	0	0	491.74	TEST	0

## Sheet: Dataset 4
No.	Name	MW	S_aaaC	2χv	Atype_C_24	Activity	Division
1	Benzene	78.1134	0	1.1547	6	0	Training
4	1,3-Dichlorobenzene	147.004	0	2.31276	4	1	Training
5	1,4-Dichlorobenzene	147.004	0	2.30931	4	1	Training
6	1,2,3-Trichlorobenzene	181.449	0	2.72801	3	1	Training
7	1,2,4-Trichlorobenzene	181.449	0	2.80927	3	1	Training
8	1,3,5-Trichlorobenzene	181.449	0	2.89697	3	1	Training
9	1,2,3,4-Tetrachlorobenzene	215.894	0	3.2275	2	1	Training
10	1,2,4,5-Tetrachlorobenzene	215.894	0	3.30923	2	1	Training
11	Hexachlorobenzene	284.784	0	4.15168	0	1	Training
12	Ethylbenzene	106.167	0	1.83915	5	1	Training
13	2-Chloro-p-xylene	140.612	0	2.65984	3	1	Training
14	Nitrobenzene	123.111	0	1.59266	5	1	Training
15	2-Chlorotoluene	126.585	0	2.15638	4	1	Training
17	4-Chlorotoluene	126.585	0	2.232	4	1	Training
18	2,4-Dichlorotoluene	161.03	0	2.73714	3	1	Training
19	2,6-Dinitrotoluene	182.135	0	2.43548	3	1	Training
20	1,1-Dichloroethane	98.9596	0	2.05161	0	0	Training
21	1,2-Dichloroethane	98.9596	0	1.13389	0	0	Training
22	1,1,1-Trichloroethane	133.405	0	3.62941	0	0	Training
23	1,1,2-Trichloroethane	133.405	0	2.13104	0	0	Training
24	1,1,1,2-Tetrachloroethane	167.85	0	3.53214	0	1	Training
26	Pentachloroethane	202.295	0	4.30751	0	1	Training
27	Hexachloroethane	236.74	0	5.55798	0	1	Training
29	Chloroform	119.378	0	2.22692	0	0	Training
30	Tetrachloromethane	153.823	0	3.85714	0	0	Training
32	1,3-Dichloropropane	112.986	0	1.48745	0	0	Training
38	Phenol	94.1128	0	1.33555	5	1	Training
40	4-Chlorophenol	128.558	0	1.91285	4	1	Training
44	2,3,4,6-Tetrachlorophenol	231.893	0	3.38711	1	1	Training
46	2-Nitrophenol	139.11	0	1.74582	4	1	Training
48	4-Nitrophenol	139.11	0	1.77351	4	1	Training
50	2,4-Dinitrophenol	184.108	0	2.18724	3	1	Training
51	3-Chloroaniline	127.573	0	1.99144	4	1	Training
52	4-Chloroaniline	127.573	0	1.98799	4	1	Training
53	2,4-Dichloroaniline	162.018	0	2.50947	3	1	Training
54	2,5-Dichloroaniline	162.018	0	2.50947	3	1	Training
55	2,6-Dichloroaniline	162.018	0	2.44973	3	1	Training
63	2-Bromoaniline	172.024	0	2.37585	4	1	Training
66	Propionaldehyde	58.0798	0	0.574915	0	0	Training
67	Butyraldehyde	72.1066	0	0.955342	0	0	Training
68	Glutaraldehyde	100.117	0	1.26424	0	1	Training
70	3-Pyridinecarboxaldehyde	107.112	0	1.40421	2	0	Training
71	4-Pyridinecarboxaldehyde	107.112	0	1.3984	2	1	Training
72	2-Hydroxybenaldehyde	122.123	0	1.67667	4	1	Training
73	3-Hydroxybenaldehyde	122.123	0	1.71284	4	0	Training
74	4-Hydroxybenaldehyde	122.123	0	1.70938	4	1	Training
75	Acetonitrile	41.0524	0	0.223607	0	0	Training
76	Chloroacetonitrile	75.4975	0	0.559006	0	0	Training
77	Dichloroacetonitrile	109.943	0	1.52606	0	1	Training
78	Trichloroacetonitrile	144.388	0	2.89079	0	1	Training
79	Bromoacetoitrile	119.948	0	0.852479	0	1	Training
80	Propionitrile	55.0792	0	0.511667	0	0	Training
83	Isobutyronitrile	69.106	0	1.2838	0	0	Training
84	4-Chlorobutyronitrile	103.551	0	1.32861	0	0	Training
86	Malononitrile	66.0622	0	0.493004	0	0	Training
87	1-Propanol	60.0956	0	0.723607	0	0	Training
89	1-Octanol	130.23	0	2.49137	0	1	Training
90	Acetone	58.0798	0	0.908248	0	0	Training
91	2-octanone	128.214	0	2.51268	0	0	Training
92	Atrazine	215.685	0	3.41908	0	1	Training
93	MCPA	200.621	0	3.02867	3	1	Training
94	Parathion	291.258	0	6.0601	4	1	Training
95	Dichlorvos	220.977	0	4.16868	0	1	Training
96	Malathion	330.35	0	9.78235	0	1	Training
97	Fenthion	278.32	0	7.03209	3	1	Training
98	Benzanthrone	230.265	2.21903	4.58397	10	1	Training
99	Fluoranthene	202.255	2.74759	4.25484	10	1	Training
100	Anthracene	178.233	5.24518	3.54651	10	1	Training
101	Benzo[a]anthrace	228.293	7.90451	4.70719	12	1	Training
102	Phenanthrene	178.233	5.29963	3.50783	10	1	Training
104	Benzo[b]fluorene	216.282	2.68242	4.69043	10	1	Training
105	Dibenzo[b,i]anthracene	278.353	10.4319	5.94523	14	1	Training
106	Perylene	252.315	5.43094	5.41852	12	1	Training
107	Benzo[b]chrysene	278.353	10.5438	5.86788	14	1	Training
2	Chlorobenzene	112.558	0	1.732	5	1	Test
3	1,2-Dichlorobenzene	147.004	0	2.22851	4	1	Test
16	Toluene	92.1402	0	1.6547	5	0	Test
25	1,1,2,2-Tetrachloroethane	167.85	0	2.99647	0	1	Test
28	Methylene chloride	84.9328	0	0.909137	0	0	Test
31	1,2-Dichloropropane	112.986	0	1.98872	0	0	Test
33	1-Chlorobutane	92.5681	0	1.4205	0	0	Test
34	cis-1,2-Dichloroethylene	96.9438	0	0.755929	0	0	Test
35	trans-1,2-Dichloroethylene	96.9438	0	0.755929	0	0	Test
36	Trichloroethylene	131.389	0	1.62484	0	0	Test
37	Tetrachloroethylene	165.834	0	2.41961	0	1	Test
39	2-Chlorophenol	128.558	0	1.85861	4	1	Test
41	2,3-Dichlorophenol	163.003	0	2.35811	3	1	Test
42	2,4-Dichlorophenol	163.003	0	2.43937	3	1	Test
45	Pentachlorophenol	266.338	0	3.80834	0	1	Test
47	3-Nitrophenol	139.11	0	1.77696	4	1	Test
49	2,4-Dimethylphenol	122.166	0	2.28994	3	1	Test
56	3,4-Dichloroaniline	162.018	0	2.48795	3	1	Test
57	3,5-Dichloroaniline	162.018	0	2.57565	3	1	Test
58	2,4,5-Trichloroaniline	196.463	0	3.00943	2	1	Test
59	2,4,6-Trichloroaniline	196.463	0	3.03395	2	1	Test
60	3,4,5-Trichloroaniline	196.463	0	2.9909	2	1	Test
61	2,3-Dimethylaniline	121.182	0	2.28914	3	0	Test
62	3,4-Dimethylaniline	121.182	0	2.3437	3	1	Test
69	2-Pyridinecarboxaldehyde	107.112	0	1.37245	3	0	Test
81	3-Chloropropionitrile	89.5243	0	0.975061	0	0	Test
82	Butyronitrile	69.106	0	0.908114	0	0	Test
85	Benzonitrile	103.123	0	1.47783	5	0	Test
88	2-Propanol	60.0956	0	1.09375	0	0	Test
103	Acridine	179.221	4.52296	3.37377	9	1	Test
108	Napthalene	128.173	2.62037	2.34715	8	1	Test

## Sheet: Dataset 5
No.	NAME	Wap	MAXDP	nRNNOx	Cl-086	Activity	Set
C02	Acrylamide	18	2.472	0	0	0	TRAIN
C03	Acrylonitrile	10	1.507	0	0	0	TRAIN
C04	Aldrin	8979	2.651	0	2	0	TRAIN
C05	Aniline	131	1.358	0	0	1	TRAIN
C10	Benzo[a]pyrene	34134	0.309	0	0	0	TRAIN
C11	Benzotrichloride	296	1.478	0	0	0	TRAIN
C12	Benzyl chloride	184	1.416	0	1	1	TRAIN
C13	Bis(chloroethyl)ether	56	1.368	0	2	0	TRAIN
C14	Bis(chloromethyl)ether	20	0.884	0	0	0	TRAIN
C15	Bromate	9	1.632	0	0	0	TRAIN
C16	Bromodichloromethane	9	0.846	0	0	1	TRAIN
C18	Carbon tetrachloride	16	0.715	0	0	1	TRAIN
C19	Chlordane	4960	2.508	0	4	1	TRAIN
C20	Di(2-ethylhexyl)adipate	2351	4.798	0	0	1	TRAIN
C21	Di(2-ethylhexyl)phthalate	5086	5.57	0	0	1	TRAIN
C22	Dibromochloromethane	9	0.997	0	0	1	TRAIN
C23	1,2-Dibromoethane	10	0.451	0	0	0	TRAIN
C24	3,30-Dichlorobenzidine	1969	1.841	0	0	0	TRAIN
C25	p,p0-DDA	2135	1.981	0	0	1	TRAIN
C26	p,p0-DDE	2135	1.86	0	0	1	TRAIN
C27	DDT	2296	2.002	0	0	1	TRAIN
C29	Dichloromethane	4	0.653	0	0	1	TRAIN
C30	1,3-Dichloropropene	20	1.019	0	1	1	TRAIN
C31	Dichlorvos	168	4.027	0	0	1	TRAIN
C32	Dieldrin	16825	2.713	0	2	0	TRAIN
C33	1,4-Dioxane	90	1.444	0	0	1	TRAIN
C35	Epichlorohydrin	37	1.226	0	1	1	TRAIN
C36	Folpet	2120	4.793	0	0	1	TRAIN
C38	Furmecyclox	2017	5.45	0	0	1	TRAIN
C40	Heptachlor epoxide	8096	2.539	0	3	0	TRAIN
C41	Hexachlorobenzene	486	1.558	0	0	0	TRAIN
C42	Hexachlorobutadiene	121	1.307	0	0	1	TRAIN
C43	alpha-HCH	486	1.77	0	6	0	TRAIN
C45	Technical HCH	486	1.77	0	6	0	TRAIN
C46	Hexachlorodibenzo-p-dioxin	8262	2.136	0	0	0	TRAIN
C49	Hydrazine/Hydrazine sulfate	1	0	0	0	0	TRAIN
C50	Isophorone	306	4.013	0	0	1	TRAIN
C51	4,4'-Methylenebis(N,N'-dimethyl)aniline	3178	0.204	0	0	1	TRAIN
C52	N-Nitroso-di-n-butylamine	188	3.193	1	0	0	TRAIN
C53	N-Nitroso-N-methylethylamine	31	2.412	1	0	0	TRAIN
C54	N-Nitrosodi-N-propylamine	102	2.961	1	0	0	TRAIN
C55	N-Nitrosodiethanolamine	102	2.739	1	0	0	TRAIN
C56	N-Nitrosodiethylamine	48	2.643	1	0	0	TRAIN
C58	N-Nitrosodiphenylamine	1398	3.782	0	0	1	TRAIN
C59	N-Nitrosopyrrolidine	118	2.683	1	0	0	TRAIN
C60	Pentachlorophenol	486	3.201	0	0	1	TRAIN
C61	Prochloraz	3729	5.341	0	0	1	TRAIN
C62	Propylene oxide	20	1.208	0	0	0	TRAIN
C65	1,1,2,2-Tetrachloroethane	29	1.003	0	0	1	TRAIN
C66	1,1,2-Trichloroethane	18	0.985	0	1	1	TRAIN
C67	2,4,6-Trichlorophenol	314	3.008	0	0	1	TRAIN
C69	2,4,6-Trinitrotoluene	1022	3.532	0	0	1	TRAIN
C70	Vinyl chloride	4	0.651	0	0	0	TRAIN
C71	BDE-209	4794	2.686	0	0	1	TRAIN
C01	Acephate	122	4.17	0	0	1	TEST
C06	Aramite	2275	4.331	0	1	1	TEST
C07	Azobenzene	1390	1.101	0	0	1	TEST
C17	Bromoform	9	0.354	0	0	1	TEST
C28	1,2-Dichloroethane	10	0.943	0	2	1	TEST
C34	1,2-Diphenylhydrazine	1390	0.611	0	0	0	TEST
C37	Fomesafen	8280	5.011	0	0	1	TEST
C39	Heptachlor	4255	2.461	0	3	0	TEST
C44	beta-HCH	486	1.77	0	6	0	TEST
C47	Hexachloroethane	58	1.033	0	0	1	TEST
C48	Hexahydro-1,3,5-trinitro-1,3,5-triazine	879	3.324	0	0	1	TEST
C57	N-Nitrosodimethylamine	18	2.181	1	0	0	TEST
C63	Quinoline	751	1.181	0	0	0	TEST
C64	1,1,1,2-Tetrachloroethane	28	1.005	0	1	1	TEST
C68	Trifluralin	2529	4.845	0	0	1	TEST
C72	Dichloroacetic acid	29	2.435	0	0	1	TEST
