# Supplementary material for: ARKA: a framework of dimensionality reduction for machine-learning classification modeling, risk assessment, and data gap-filling of sparse environmental toxicity data
Source: Royal Society of Chemistry journal article supplement (doi:10.1039/d4em00173g), 2024-01-01
Supplement: d4em00173g2.xlsx [file d4em00173g2.xlsx]

## Sheet: Calculation for Dataset 2
									ARKA: A framework of dimensionality reduction
									for machine-learning classification modeling, risk
													assessment, and data gap-filling of sparse environmental toxicity data
												Arkaprava Banerjee, Kunal Roy*
												Drug Theoretics and Cheminformatics Laboratory, Department of Pharmaceutical Technology, Jadavpur University, Kolkata 700 032, India
												*Correspondence to: Kunal Roy (kunal.roy@jadavpuruniversity.in)
										Supplementary Materials SI-2

## Sheet: Normalized_Train
No.	X3A	ETA_Psi_1	MLOGP2	MLOGP	B03[O-O]	B09[C-C]	B02[O-S]	ETA_Beta	Observed Class
4	0.46479	0.44203	0.17466	0.61786	1	0	0	0.2948	1
5	0.3662	0.94565	0.30818	0.70797	0	0	0	0.35838	1
11	0.35915	0.50362	0.18683	0.6273	0	0	0	0.54335	1
20	0.32394	0.55072	0.31638	0.71275	0	1	0	0.93064	1
23	0.33099	0.58696	0.16007	0.6062	1	1	0	0.52601	1
30	0.52113	0.50362	0.03913	0.47342	1	1	0	0.36416	1
33	0.76761	0.80797	0.13853	0.09897	0	0	0	0	1
39	0.55634	0.97826	0.00114	0.36652	0	0	0	0.07514	1
42	0.43662	0.81884	0.2753	0.68804	0	0	0	0.2659	1
50	0.35915	0.67754	0.26461	0.68128	0	1	0	0.59538	1
51	0.23239	0.94565	0.14191	0.59081	0	0	0	0.39884	1
52	0.20423	0.7971	0.05461	0.49697	0	0	0	0.63006	1
59	0.35915	0.56884	0.13538	0.5851	0	0	1	0.21387	1
60	0.28169	0.64855	0.33514	0.7236	1	1	0	0.82081	1
74	0.35915	0.32971	0.08475	0.53462	0	0	0	0.41618	1
88	0.53521	0.24638	9e-05	0.33469	1	0	0	0.07514	1
89	0.35915	0.75362	0.31061	0.70937	0	0	0	0.48555	1
90	0.35915	0.3913	0.03506	0.46654	0	0	0	0.42775	1
93	0.29577	0.62319	0.41141	0.76463	1	1	0	0.68786	1
96	0.55634	0.53986	0.0075	0.40068	0	1	1	0.28324	1
97	0.3662	0.72101	0.22684	0.65621	1	1	0	0.54335	1
100	0.33803	0.53623	0.11454	0.56575	1	0	0	0.40462	1
101	0.37324	0.57246	0.12107	0.57193	0	0	0	0.35838	1
104	1	0.43116	0	0.35008	0	0	0	0.10983	1
106	0.33099	0.59058	0.08049	0.52984	0	0	0	0.19653	1
108	0.35915	0.79348	0.30298	0.70494	1	1	0	0.45665	1
112	0.6831	0.36594	0.00665	0.28946	0	0	0	0.21387	1
120	0.28169	0.71739	0.08629	0.53637	0	1	1	0.45087	1
126	0.3662	0.71739	0.33602	0.72406	1	1	0	0.46243	1
128	0.5	0.94928	0.30055	0.70343	0	1	1	0.2948	1
132	0.37324	0.84783	0.19765	0.63535	0	0	0	0.4104	1
136	0.30282	0.59783	0.11776	0.56878	0	0	0	0.34104	1
137	0.35915	0.54348	0.24002	0.66519	1	1	0	0.7052	1
138	0.35915	0.58696	0.32672	0.71882	1	1	0	0.7341	1
139	0.3662	0.57246	0.23403	0.66111	1	1	0	0.80347	1
144	0.37324	0.25725	0.09052	0.54104	0	0	0	0.44509	1
148	0.30986	0.79348	0.37531	0.74574	0	1	0	0.52023	1
150	0.40141	0.22826	0.57778	0.8425	0	0	0	0.53179	1
155	0.48592	0.76812	0.28583	0.69457	0	0	1	0.18497	1
158	0.55634	0.38043	0.00744	0.40044	1	0	0	0.11561	1
2	0.27465	0.75	0.24535	0.66869	0	0	0	0.3526	0
3	0.42254	0.30435	0.03027	0.4578	0	0	0	0.08671	0
7	0.3169	0.70652	0.15045	0.59816	0	1	0	0.53757	0
9	0.3169	0.75	1	1	1	1	0	0.54335	0
12	0.25352	0.23913	0.5279	0.82047	0	1	0	0.91329	0
13	0.3169	0.77174	0.65058	0.87305	0	1	0	0.4104	0
15	0.37324	0.38406	0.02018	0.43693	0	0	0	0.28902	0
16	0.21831	0.52174	0.23028	0.65855	0	1	0	0.75145	0
17	0.44366	0.3442	0.00202	0.31336	0	0	0	0.3526	0
22	0.24648	0.13043	0.29951	0.70284	0	1	0	0.52601	0
24	0.33803	0.43116	0.31604	0.71264	0	1	0	0.64162	0
25	0.33099	0.74275	0.52708	0.82012	1	1	0	0.66474	0
26	0.22535	0.86594	0.54562	0.8284	0	0	0	0.48555	0
27	0.38028	0.52899	0.20881	0.64351	0	1	0	0.42775	0
28	0.23239	0.83696	0.27577	0.68827	0	1	0	0.41618	0
31	0.25352	0.74638	0.31064	0.70937	0	1	0	0.83237	0
32	0.37324	0.61594	0.11999	0.571	0	0	0	0.36416	0
35	0.28873	0.73551	0.16634	0.61133	0	1	0	0.30058	0
36	0.57042	0.23188	0.0542	0.19049	0	1	0	0.31792	0
38	0.3169	0.43116	0.04682	0.48566	0	0	0	0.28324	0
41	0.29577	0.44203	0.21672	0.6491	0	0	0	0.2948	0
43	0.44366	0.58333	0.42235	0.77011	1	1	0	0.57803	0
44	0.44366	0.38406	0.12677	0.57729	0	0	0	0.31792	0
45	0.35915	0.50725	0.10978	0.56109	1	1	0	0.3815	0
46	0.3662	0.3913	0.38792	0.75239	0	1	0	0.60116	0
54	0.19718	0.63043	0.60912	0.85591	0	1	0	0.67052	0
56	0.27465	0.33333	0.00095	0.36442	0	0	0	0.30058	0
58	0.23239	0.58696	0.78117	0.92376	0	1	0	0.6185	0
66	0.24648	0.18841	0.21061	0.64479	0	1	0	0.74566	0
67	0.42254	0.32246	0.47081	0.79401	1	1	0	0.63006	0
68	0.42254	0.32246	0.47081	0.79401	1	1	0	0.63006	0
69	0.20423	0	0.35838	0.73654	0	1	0	0.80347	0
70	0.20423	0.33333	0.76398	0.91735	0	1	0	0.87861	0
71	0.30282	0.21014	0.64247	0.86967	0	1	0	0.94798	0
72	0.42958	0.19203	0.20004	0.63721	0	0	0	0.3237	0
75	0.29577	0.11957	0.04316	0.47995	0	1	0	0.83237	0
76	0.19718	0.53986	0.74046	0.90849	0	1	0	0.80347	0
78	0.28169	0.38768	0.55054	0.83061	0	1	0	0.56069	0
79	0.27465	0.48913	0.51485	0.81453	0	0	0	0.64162	0
82	0.26056	0.73551	0.10404	0.55526	0	0	0	0.44509	0
83	0.28873	0.46377	0.5606	0.83504	0	1	0	0.76879	0
85	0	0.57971	0.23	0.65831	0	0	0	0.37572	0
86	0.76056	0.34783	0.27357	0	0	0	0	0.11561	0
87	0.72535	0.11957	0.12097	0.11495	0	0	0	0.11561	0
94	0.21831	0.64855	0.15628	0.60305	0	0	0	0.2659	0
95	0.3169	0.03986	0.58768	0.84682	0	1	0	0.80347	0
99	0.34507	0.27174	0.63352	0.86605	0	1	0	1	0
103	0.28169	0.77536	0.56958	0.83901	0	1	0	0.48555	0
105	0.26056	0.4529	0.26294	0.68011	0	1	0	0.77457	0
109	0.3169	0.33696	0.00479	0.38937	0	1	0	0.78613	0
110	0.34507	0.3587	0.10912	0.56039	0	1	0	0.80347	0
111	0.23944	0.57609	0.51182	0.81324	0	1	0	0.46821	0
113	0.27465	0.41667	0.0222	0.44148	1	1	0	0.74566	0
115	0.29577	0.23188	0.401	0.75927	0	1	0	0.63584	0
116	0.3662	0.8587	0.50438	0.80975	0	1	0	0.56647	0
117	0.28169	0.66304	0.50665	0.8108	0	1	0	0.53179	0
118	0.19014	0.10145	0.23923	0.66461	0	1	0	0.86127	0
121	0.39437	0.39493	0.03938	0.47389	0	0	0	0.31792	0
124	0.33803	0.30435	0.00593	0.29249	0	0	0	0.24277	0
127	0.26056	1	0.47601	0.79646	0	1	0	0.39884	0
129	0.30986	0.22464	0.23709	0.66321	0	1	0	0.72254	0
130	0.44366	0.52174	0.00826	0.40336	0	1	0	0.38728	0
131	0.38028	0.37681	0.63579	0.86699	0	1	0	0.7052	0
133	0.42958	0.73913	0.40289	0.7602	1	1	0	0.69942	0
140	0.14085	0.73551	0.55732	0.83364	1	1	0	0.51445	0
141	0.21127	0.58696	0.15411	0.60131	0	1	0	0.53757	0
142	0.30986	0.81159	0.34034	0.72651	0	1	0	0.19653	0
143	0.27465	0.51812	0.06214	0.50723	0	1	0	0.49711	0
145	0.33099	0.49638	0.72946	0.90417	0	1	0	0.95376	0
146	0.38732	0.76087	0.50769	0.81126	0	1	0	0.46243	0
149	0.34507	0.22101	0.50158	0.80846	0	1	0	0.68786	0
151	0.26056	0.30072	0.02402	0.44544	0	1	0	0.60116	0
157	0.25352	0.51812	0.15417	0.60131	0	0	0	0.55491	0
159	0.16197	0.8587	0.18047	0.62241	0	0	0	0.3815	0
161	0.28169	0.18841	0.19049	0.6301	0	1	0	0.86127	0
162	0.28169	0.77536	0.5477	0.82933	0	1	0	0.52023	0
163	0.40141	0.51812	0.16603	0.61098	0	1	0	0.53757	0
High Mean	0.412852	0.615761	0.185244	0.582323	0.35	0.4	0.125	0.416907
Low Mean	0.316261	0.478732	0.325558	0.663742	0.116883	0.727273	0	0.550484
Diff	0.096591	0.137029	-0.140314	-0.0814187	0.233117	-0.327273	0.125	-0.133577
Abs diff	0.096591	0.137029	0.140314	0.0814187	0.233117	0.327273	0.125	0.133577

## Sheet: Features
Desc	Abs Diff
B09[C-C]	0.327273
B03[O-O]	0.233117
MLOGP2	0.140314
ETA_Psi_1	0.137029
ETA_Beta	0.133577
B02[O-S]	0.125
X3A	0.096591
MLOGP	0.0814187

## Sheet: Feature_cluster
Desc	Diff (Residual)	Abs Diff	Cluster
B09[C-C]	-0.327273	0.327273	0
B03[O-O]	0.233117	0.233117	1
MLOGP2	-0.140314	0.140314	0
ETA_Psi_1	0.137029	0.137029	1
ETA_Beta	-0.133577	0.133577	0
B02[O-S]	0.125	0.125	1
X3A	0.096591	0.096591	1
MLOGP	-0.0814187	0.0814187	0

## Sheet: Cluster_ranking
Desc	Diff (Residual)	Abs Diff	Cluster	Res weightage
B03[O-O]	0.233117	0.233117	1	0.393954
ETA_Psi_1	0.137029	0.137029	1	0.231571
B02[O-S]	0.125	0.125	1	0.211243
X3A	0.096591	0.096591	1	0.163233
B09[C-C]	-0.327273	0.327273	0	0.479463
MLOGP2	-0.140314	0.140314	0	0.205563
ETA_Beta	-0.133577	0.133577	0	0.195694
MLOGP	-0.0814187	0.0814187	0	0.11928

## Sheet: Standardized_descriptor_matrix
No.	X3A	ETA_Psi_1	MLOGP2	MLOGP	B03[O-O]	B09[C-C]	B02[O-S]	ETA_Beta	Set
4	0.871231	-0.365771	-0.47196	-0.0972276	2.01296	-1.25949	-0.210384	-0.930154	TRAIN
5	0.127575	1.83903	0.140303	0.388272	-0.492534	-1.25949	-0.210384	-0.648548	TRAIN
11	0.0744564	-0.0961201	-0.416155	-0.0463538	-0.492534	-1.25949	-0.210384	0.170671	TRAIN
20	-0.191135	0.110084	0.177892	0.414023	-0.492534	0.787184	-0.210384	1.88591	TRAIN
23	-0.138017	0.268702	-0.538896	-0.160035	2.01296	0.787184	-0.210384	0.0938688	TRAIN
30	1.29618	-0.0961201	-1.09347	-0.875408	2.01296	0.787184	-0.210384	-0.622947	TRAIN
33	3.15532	1.23628	-0.637639	-2.89277	-0.492534	-1.25949	-0.210384	-2.23578	TRAIN
39	1.56177	1.98178	-1.26768	-1.45135	-0.492534	-1.25949	-0.210384	-1.90298	TRAIN
42	0.658758	1.28386	-0.0104858	0.280871	-0.492534	-1.25949	-0.210384	-1.05816	TRAIN
50	0.0744564	0.665249	-0.0594957	0.244443	-0.492534	0.787184	-0.210384	0.401076	TRAIN
51	-0.881673	1.83903	-0.62217	-0.24294	-0.492534	-1.25949	-0.210384	-0.469344	TRAIN
52	-1.09415	1.18869	-1.02249	-0.748538	-0.492534	-1.25949	-0.210384	0.554679	TRAIN
59	0.0744564	0.189393	-0.652096	-0.273716	-0.492534	-1.25949	4.71259	-1.28856	TRAIN
60	-0.509845	0.538354	0.263912	0.472433	2.01296	0.787184	-0.210384	1.3995	TRAIN
74	0.0744564	-0.857489	-0.884279	-0.545671	-0.492534	-1.25949	-0.210384	-0.392542	TRAIN
88	1.40241	-1.22231	-1.27245	-1.62281	2.01296	-1.25949	-0.210384	-1.90298	TRAIN
89	0.0744564	0.998347	0.151435	0.395809	-0.492534	-1.25949	-0.210384	-0.0853353	TRAIN
90	0.0744564	-0.587837	-1.11212	-0.912464	-0.492534	-1.25949	-0.210384	-0.341341	TRAIN
93	-0.403608	0.427321	0.613632	0.693514	2.01296	0.787184	-0.210384	0.810685	TRAIN
96	1.56177	0.0624984	-1.23848	-1.26732	-0.492534	0.787184	4.71259	-0.981355	TRAIN
97	0.127575	0.855591	-0.232693	0.109408	2.01296	0.787184	-0.210384	0.170671	TRAIN
100	-0.0848985	0.0466365	-0.747658	-0.377976	2.01296	-1.25949	-0.210384	-0.443743	TRAIN
101	0.180693	0.205255	-0.717732	-0.344688	-0.492534	-1.25949	-0.210384	-0.648548	TRAIN
104	4.90822	-0.413357	-1.27289	-1.53991	-0.492534	-1.25949	-0.210384	-1.74937	TRAIN
106	-0.138017	0.284564	-0.903796	-0.571422	-0.492534	-1.25949	-0.210384	-1.36536	TRAIN
108	0.0744564	1.17283	0.116448	0.371942	2.01296	0.787184	-0.210384	-0.213338	TRAIN
112	2.5179	-0.69887	-1.24238	-1.86651	-0.492534	-1.25949	-0.210384	-1.28856	TRAIN
120	-0.509845	0.839729	-0.877195	-0.53625	-0.492534	0.787184	4.71259	-0.238939	TRAIN
126	0.127575	0.839729	0.26796	0.474946	2.01296	0.787184	-0.210384	-0.187738	TRAIN
128	1.13682	1.85489	0.105316	0.363777	-0.492534	0.787184	4.71259	-0.930154	TRAIN
132	0.180693	1.41076	-0.366567	-0.00301689	-0.492534	-1.25949	-0.210384	-0.418143	TRAIN
136	-0.35049	0.316288	-0.732912	-0.361646	-0.492534	-1.25949	-0.210384	-0.72535	TRAIN
137	0.0744564	0.0783602	-0.172262	0.157769	2.01296	0.787184	-0.210384	0.887487	TRAIN
138	0.0744564	0.268702	0.225311	0.446682	2.01296	0.787184	-0.210384	1.01549	TRAIN
139	0.127575	0.205255	-0.199731	0.135787	2.01296	0.787184	-0.210384	1.3227	TRAIN
144	0.180693	-1.17473	-0.857822	-0.511127	-0.492534	-1.25949	-0.210384	-0.264539	TRAIN
148	-0.297372	1.17283	0.448097	0.591767	-0.492534	0.787184	-0.210384	0.0682682	TRAIN
150	0.393166	-1.30162	1.37654	1.11307	-0.492534	-1.25949	-0.210384	0.119469	TRAIN
155	1.03059	1.06179	0.0378013	0.316043	-0.492534	-1.25949	4.71259	-1.41657	TRAIN
158	1.56177	-0.635423	-1.23877	-1.26858	2.01296	-1.25949	-0.210384	-1.72377	TRAIN
2	-0.562963	0.982486	-0.147829	0.176612	-0.492534	-1.25949	-0.210384	-0.674148	TRAIN
3	0.552521	-0.968522	-1.1341	-0.95957	-0.492534	-1.25949	-0.210384	-1.85177	TRAIN
7	-0.244253	0.792143	-0.582991	-0.203372	-0.492534	0.787184	-0.210384	0.14507	TRAIN
9	-0.244253	0.982486	3.31265	1.96159	2.01296	0.787184	-0.210384	0.170671	TRAIN
12	-0.722318	-1.25403	1.14783	0.994361	-0.492534	0.787184	-0.210384	1.80911	TRAIN
13	-0.244253	1.07766	1.71035	1.27762	-0.492534	0.787184	-0.210384	-0.418143	TRAIN
15	0.180693	-0.619561	-1.18036	-1.07199	-0.492534	-1.25949	-0.210384	-0.955755	TRAIN
16	-0.987909	-0.0168108	-0.216935	0.121969	-0.492534	0.787184	-0.210384	1.09229	TRAIN
17	0.711876	-0.794041	-1.26364	-1.73775	-0.492534	-1.25949	-0.210384	-0.674148	TRAIN
22	-0.775436	-1.72989	0.100546	0.360637	-0.492534	0.787184	-0.210384	0.0938688	TRAIN
24	-0.0848985	-0.413357	0.176301	0.413395	-0.492534	0.787184	-0.210384	0.60588	TRAIN
25	-0.138017	0.950762	1.14407	0.992477	2.01296	0.787184	-0.210384	0.708283	TRAIN
26	-0.934791	1.49006	1.22907	1.03707	-0.492534	-1.25949	-0.210384	-0.0853353	TRAIN
27	0.233811	0.0149128	-0.315388	0.0409481	-0.492534	0.787184	-0.210384	-0.341341	TRAIN
28	-0.881673	1.36317	-0.00831722	0.282128	-0.492534	0.787184	-0.210384	-0.392542	TRAIN
31	-0.722318	0.966624	0.151579	0.395809	-0.492534	0.787184	-0.210384	1.4507	TRAIN
32	0.180693	0.395597	-0.722648	-0.349712	-0.492534	-1.25949	-0.210384	-0.622947	TRAIN
35	-0.456726	0.919038	-0.510127	-0.1324	-0.492534	0.787184	-0.210384	-0.904554	TRAIN
36	1.66801	-1.28576	-1.02437	-2.39974	-0.492534	0.787184	-0.210384	-0.827752	TRAIN
38	-0.244253	-0.413357	-1.0582	-0.809461	-0.492534	-1.25949	-0.210384	-0.981355	TRAIN
41	-0.403608	-0.365771	-0.279101	0.0710956	-0.492534	-1.25949	-0.210384	-0.930154	TRAIN
43	0.711876	0.252841	0.663798	0.723034	2.01296	0.787184	-0.210384	0.324274	TRAIN
44	0.711876	-0.619561	-0.691565	-0.315797	-0.492534	-1.25949	-0.210384	-0.827752	TRAIN
45	0.0744564	-0.0802582	-0.769489	-0.403098	2.01296	0.787184	-0.210384	-0.546146	TRAIN
46	0.127575	-0.587837	0.505925	0.627567	-0.492534	0.787184	-0.210384	0.426676	TRAIN
54	-1.14726	0.459045	1.52024	1.18529	-0.492534	0.787184	-0.210384	0.733883	TRAIN
56	-0.562963	-0.841627	-1.26855	-1.46266	-0.492534	-1.25949	-0.210384	-0.904554	TRAIN
58	-0.881673	0.268702	2.30917	1.55083	-0.492534	0.787184	-0.210384	0.503478	TRAIN
66	-0.775436	-1.4761	-0.307148	0.0478569	-0.492534	0.787184	-0.210384	1.06669	TRAIN
67	0.552521	-0.889212	0.886005	0.851788	2.01296	0.787184	-0.210384	0.554679	TRAIN
68	0.552521	-0.889212	0.886005	0.851788	2.01296	0.787184	-0.210384	0.554679	TRAIN
69	-1.09415	-2.30092	0.370461	0.542149	-0.492534	0.787184	-0.210384	1.3227	TRAIN
70	-1.09415	-0.841627	2.23038	1.51629	-0.492534	0.787184	-0.210384	1.6555	TRAIN
71	-0.35049	-1.38093	1.6732	1.25941	-0.492534	0.787184	-0.210384	1.96271	TRAIN
72	0.605639	-1.46024	-0.355579	0.00703225	-0.492534	-1.25949	-0.210384	-0.802151	TRAIN
75	-0.403608	-1.77748	-1.07497	-0.840236	-0.492534	0.787184	-0.210384	1.4507	TRAIN
76	-1.14726	0.0624984	2.12253	1.46855	-0.492534	0.787184	-0.210384	1.3227	TRAIN
78	-0.509845	-0.603699	1.25163	1.049	-0.492534	0.787184	-0.210384	0.247472	TRAIN
79	-0.562963	-0.159567	1.08797	0.962329	-0.492534	-1.25949	-0.210384	0.60588	TRAIN
82	-0.6692	0.919038	-0.795801	-0.434502	-0.492534	-1.25949	-0.210384	-0.264539	TRAIN
83	-0.456726	-0.2706	1.29775	1.07287	-0.492534	0.787184	-0.210384	1.16909	TRAIN
85	-2.63458	0.236979	-0.218236	0.120713	-0.492534	-1.25949	-0.210384	-0.571746	TRAIN
86	3.1022	-0.77818	-0.0184373	-3.42601	-0.492534	-1.25949	-0.210384	-1.72377	TRAIN
87	2.83661	-1.77748	-0.718166	-2.80673	-0.492534	-1.25949	-0.210384	-1.72377	TRAIN
94	-0.987909	0.538354	-0.556245	-0.176993	-0.492534	-1.25949	-0.210384	-1.05816	TRAIN
95	-0.244253	-2.12644	1.42193	1.1363	-0.492534	0.787184	-0.210384	1.3227	TRAIN
99	-0.0317802	-1.11128	1.63214	1.23994	-0.492534	0.787184	-0.210384	2.19312	TRAIN
103	-0.509845	1.09352	1.33895	1.09422	-0.492534	0.787184	-0.210384	-0.0853353	TRAIN
105	-0.6692	-0.318186	-0.067158	0.238163	-0.492534	0.787184	-0.210384	1.19469	TRAIN
109	-0.244253	-0.825765	-1.25091	-1.32825	-0.492534	0.787184	-0.210384	1.24589	TRAIN
110	-0.0317802	-0.730594	-0.772525	-0.406867	-0.492534	0.787184	-0.210384	1.3227	TRAIN
111	-0.828554	0.221117	1.07409	0.95542	-0.492534	0.787184	-0.210384	-0.162137	TRAIN
113	-0.562963	-0.476804	-1.17111	-1.0475	2.01296	0.787184	-0.210384	1.06669	TRAIN
115	-0.403608	-1.28576	0.565923	0.664623	-0.492534	0.787184	-0.210384	0.58028	TRAIN
116	0.127575	1.45834	1.03997	0.936578	-0.492534	0.787184	-0.210384	0.273073	TRAIN
117	-0.509845	0.601801	1.05038	0.942231	-0.492534	0.787184	-0.210384	0.119469	TRAIN
118	-1.20038	-1.85679	-0.175876	0.154629	-0.492534	0.787184	-0.210384	1.5787	TRAIN
121	0.340048	-0.571976	-1.09232	-0.872896	-0.492534	-1.25949	-0.210384	-0.827752	TRAIN
124	-0.0848985	-0.968522	-1.24571	-1.85018	-0.492534	-1.25949	-0.210384	-1.16056	TRAIN
127	-0.6692	2.07695	0.90986	0.864978	-0.492534	0.787184	-0.210384	-0.469344	TRAIN
129	-0.297372	-1.31748	-0.185707	0.147092	-0.492534	0.787184	-0.210384	0.964288	TRAIN
130	0.711876	-0.0168108	-1.23501	-1.25288	-0.492534	0.787184	-0.210384	-0.520545	TRAIN
131	0.233811	-0.651285	1.64255	1.24496	-0.492534	0.787184	-0.210384	0.887487	TRAIN
133	0.605639	0.9349	0.574597	0.669648	2.01296	0.787184	-0.210384	0.861886	TRAIN
140	-1.57221	0.919038	1.28271	1.06533	2.01296	0.787184	-0.210384	0.0426676	TRAIN
141	-1.04103	0.268702	-0.566221	-0.186414	-0.492534	0.787184	-0.210384	0.14507	TRAIN
142	-0.297372	1.25214	0.287766	0.488135	-0.492534	0.787184	-0.210384	-1.36536	TRAIN
143	-0.562963	-0.0326727	-0.987937	-0.693268	-0.492534	0.787184	-0.210384	-0.0341341	TRAIN
145	-0.138017	-0.127844	2.07207	1.44532	-0.492534	0.787184	-0.210384	1.98831	TRAIN
146	0.28693	1.03007	1.05515	0.944743	-0.492534	0.787184	-0.210384	-0.187738	TRAIN
149	-0.0317802	-1.33334	1.02711	0.929669	-0.492534	0.787184	-0.210384	0.810685	TRAIN
151	-0.6692	-0.984384	-1.16272	-1.02615	-0.492534	0.787184	-0.210384	0.426676	TRAIN
157	-0.722318	-0.0326727	-0.565931	-0.186414	-0.492534	-1.25949	-0.210384	0.221872	TRAIN
159	-1.41286	1.45834	-0.445358	-0.0727328	-0.492534	-1.25949	-0.210384	-0.546146	TRAIN
161	-0.509845	-1.4761	-0.399384	-0.0312801	-0.492534	0.787184	-0.210384	1.5787	TRAIN
162	-0.509845	1.09352	1.23862	1.04209	-0.492534	0.787184	-0.210384	0.0682682	TRAIN
163	0.393166	-0.0326727	-0.511572	-0.134284	-0.492534	0.787184	-0.210384	0.14507	TRAIN
No.	X3A	ETA_Psi_1	MLOGP2	MLOGP	B03[O-O]	B09[C-C]	B02[O-S]	ETA_Beta	Set
1	8.67962	1.18869	-0.647036	-0.268691	-0.492534	-1.25949	-0.210384	-2.26138	TEST
10	0.0213381	0.808005	0.190758	0.422816	-0.492534	-1.25949	-0.210384	-0.75095	TEST
114	3.63338	0.538354	-1.27318	-1.55812	-0.492534	-1.25949	4.71259	-1.57017	TEST
125	1.45553	0.728696	0.0941843	0.35624	-0.492534	-1.25949	-0.210384	-0.955755	TEST
21	-0.0848985	0.9349	0.647317	0.713613	-0.492534	0.787184	-0.210384	0.375475	TEST
29	0.0213381	-0.286462	-1.11343	-0.914977	-0.492534	-1.25949	-0.210384	-0.597347	TEST
37	-0.456726	1.58524	0.0625231	0.333629	-0.492534	0.787184	-0.210384	-0.264539	TEST
40	-0.0317802	0.9349	-0.417311	-0.04761	-0.492534	0.787184	4.71259	-0.597347	TEST
53	3.6865	1.50593	1.04822	0.940975	-0.492534	0.787184	-0.210384	-1.64697	TEST
55	-0.297372	-0.825765	-0.897724	-0.563257	-0.492534	0.787184	-0.210384	1.22029	TEST
57	1.72112	2.2673	-0.659759	-0.281881	-0.492534	-1.25949	4.71259	-1.77497	TEST
61	-0.0317802	1.268	0.756324	0.777676	-0.492534	0.787184	-0.210384	-0.648548	TEST
62	-0.244253	1.64868	2.13944	1.47609	-0.492534	0.787184	-0.210384	0.452277	TEST
77	0.711876	-1.42852	-1.03015	-0.761099	2.01296	-1.25949	-0.210384	-0.622947	TEST
8	-0.881673	0.0624984	-0.832233	-0.478467	2.01296	0.787184	-0.210384	2.19312	TEST
91	-0.6692	1.17283	1.63243	1.23994	-0.492534	0.787184	-0.210384	-0.0341341	TEST
98	1.61489	1.96592	-0.613929	-2.91727	-0.492534	-1.25949	-0.210384	-2.15898	TEST
102	-0.138017	0.855591	-0.276354	0.0736078	-0.492534	-1.25949	-0.210384	-0.110936	TEST
107	-0.297372	-0.857489	-0.871701	-0.528713	-0.492534	0.787184	-0.210384	1.01549	TEST
119	-0.881673	-0.381633	0.448097	0.591767	-0.492534	0.787184	-0.210384	0.0682682	TEST
122	-1.09415	0.601801	1.03188	0.932182	-0.492534	0.787184	-0.210384	0.247472	TEST
123	0.0744564	0.395597	0.371184	0.542777	-0.492534	0.787184	-0.210384	0.401076	TEST
134	-1.2535	-1.63472	-0.349218	0.0120568	-0.492534	0.787184	-0.210384	1.4251	TEST
135	-0.881673	0.459045	-0.376687	-0.0118099	-0.492534	-1.25949	-0.210384	-0.494944	TEST
14	0.28693	-1.39679	-1.26552	-1.43	-0.492534	0.787184	-0.210384	0.324274	TEST
147	-0.191135	1.28386	2.00311	1.41454	-0.492534	0.787184	-0.210384	0.375475	TEST
152	0.0213381	0.0307747	-0.0973736	0.215552	-0.492534	-1.25949	-0.210384	-0.597347	TEST
153	-0.934791	-0.207153	-0.630555	-0.251733	-0.492534	0.787184	-0.210384	0.682682	TEST
154	-0.828554	0.9349	-0.191056	0.142696	-0.492534	0.787184	-0.210384	-0.187738	TEST
156	-0.244253	-0.587837	-0.746936	-0.377348	-0.492534	0.787184	-0.210384	0.913087	TEST
160	-0.934791	-1.72989	0.100546	0.360637	-0.492534	-1.25949	-0.210384	0.0938688	TEST
164	0.711876	0.665249	0.726253	0.76009	-0.492534	0.787184	-0.210384	-0.443743	TEST
18	-2.52834	-0.794041	-1.26812	-1.457	2.01296	0.787184	-0.210384	1.86031	TEST
19	-0.775436	-1.07955	-0.985479	-0.689499	-0.492534	0.787184	-0.210384	1.6043	TEST
34	-0.722318	1.01421	1.36873	1.1093	-0.492534	0.787184	-0.210384	0.631481	TEST
47	-0.297372	-1.19059	1.32594	1.08732	-0.492534	0.787184	-0.210384	1.3739	TEST
48	-0.191135	-0.254739	-0.870978	-0.528085	-0.492534	-1.25949	-0.210384	-0.597347	TEST
49	-0.138017	0.570078	-0.272595	0.0767482	2.01296	0.787184	-0.210384	0.785084	TEST
63	0.340048	0.728696	0.43523	0.583602	-0.492534	0.787184	-0.210384	-0.520545	TEST
64	-0.0317802	-0.0168108	0.471084	0.606213	2.01296	0.787184	-0.210384	0.861886	TEST
65	-0.0848985	1.9342	0.843501	0.827922	-0.492534	0.787184	-0.210384	-0.75095	TEST
73	-0.35049	-1.58713	1.19279	1.01823	-0.492534	0.787184	-0.210384	0.452277	TEST
80	-1.09415	0.427321	-0.316256	0.04032	-0.492534	-1.25949	-0.210384	-0.699749	TEST
81	1.18994	0.0466365	-0.944421	-0.628576	-0.492534	-1.25949	-0.210384	-0.571746	TEST
84	-2.63458	0.236979	-0.146528	0.177868	-0.492534	-1.25949	-0.210384	-0.674148	TEST
92	-0.191135	0.205255	-0.295582	0.057906	-0.492534	0.787184	-0.210384	0.298673	TEST

## Sheet: ARKA_1
No.	B03[O-O]	ETA_Psi_1	B02[O-S]	X3A	ARKA_1
4	2.01296	-0.365771	-0.210384	0.871231	0.805869
5	-0.492534	1.83903	-0.210384	0.127575	0.208999
11	-0.492534	-0.0961201	-0.210384	0.0744564	-0.248613
20	-0.492534	0.110084	-0.210384	-0.191135	-0.244065
23	2.01296	0.268702	-0.210384	-0.138017	0.788559
30	2.01296	-0.0961201	-0.210384	1.29618	0.937694
33	-0.492534	1.23628	-0.210384	3.15532	0.562683
39	-0.492534	1.98178	-0.210384	1.56177	0.475892
42	-0.492534	1.28386	-0.210384	0.658758	0.166784
50	-0.492534	0.665249	-0.210384	0.0744564	-0.0719752
51	-0.492534	1.83903	-0.210384	-0.881673	0.0444919
52	-0.492534	1.18869	-0.210384	-1.09415	-0.141019
59	-0.492534	0.189393	4.71259	0.0744564	0.856375
60	2.01296	0.538354	-0.210384	-0.509845	0.79051
74	-0.492534	-0.857489	-0.210384	0.0744564	-0.42525
88	2.01296	-1.22231	-0.210384	1.40241	0.693734
89	-0.492534	0.998347	-0.210384	0.0744564	0.0053037
90	-0.492534	-0.587837	-0.210384	0.0744564	-0.362691
93	2.01296	0.427321	-0.210384	-0.403608	0.782067
96	-0.492534	0.0624984	4.71259	1.56177	1.06937
97	2.01296	0.855591	-0.210384	0.127575	0.968009
100	2.01296	0.0466365	-0.210384	-0.0848985	0.745698
101	-0.492534	0.205255	-0.210384	0.180693	-0.161377
104	-0.492534	-0.413357	-0.210384	4.90822	0.465692
106	-0.492534	0.284564	-0.210384	-0.138017	-0.194927
108	2.01296	1.17283	-0.210384	0.0744564	1.03295
112	-0.492534	-0.69887	-0.210384	2.5179	0.00983012
120	-0.492534	0.839729	4.71259	-0.509845	0.912012
126	2.01296	0.839729	-0.210384	0.127575	0.964329
128	-0.492534	1.85489	4.71259	1.13682	1.41593
132	-0.492534	1.41076	-0.210384	0.180693	0.118299
136	-0.492534	0.316288	-0.210384	-0.35049	-0.2222
137	2.01296	0.0783602	-0.210384	0.0744564	0.779033
138	2.01296	0.268702	-0.210384	0.0744564	0.823192
139	2.01296	0.205255	-0.210384	0.127575	0.817131
144	-0.492534	-1.17473	-0.210384	0.180693	-0.481533
148	-0.492534	1.17283	-0.210384	-0.297372	-0.0148248
150	-0.492534	-1.30162	-0.210384	0.393166	-0.476339
155	-0.492534	1.06179	4.71259	1.03059	1.21462
158	2.01296	-0.635423	-0.210384	1.56177	0.855867
2	-0.492534	0.982486	-0.210384	-0.562963	-0.102276
3	-0.492534	-0.968522	-0.210384	0.552521	-0.373085
7	-0.492534	0.792143	-0.210384	-0.244253	-0.0944853
9	2.01296	0.982486	-0.210384	-0.244253	0.93684
12	-0.492534	-1.25403	-0.210384	-0.722318	-0.647123
13	-0.492534	1.07766	-0.210384	-0.244253	-0.0282462
15	-0.492534	-0.619561	-0.210384	0.180693	-0.352734
16	-0.492534	-0.0168108	-0.210384	-0.987909	-0.403379
17	-0.492534	-0.794041	-0.210384	0.711876	-0.306631
22	-0.492534	-1.72989	-0.210384	-0.775436	-0.76618
24	-0.492534	-0.413357	-0.210384	-0.0848985	-0.348187
25	2.01296	0.950762	-0.210384	-0.138017	0.946797
26	-0.492534	1.49006	-0.210384	-0.934791	-0.0451252
27	-0.492534	0.0149128	-0.210384	0.233811	-0.196878
28	-0.492534	1.36317	-0.210384	-0.881673	-0.0659065
31	-0.492534	0.966624	-0.210384	-0.722318	-0.13193
32	-0.492534	0.395597	-0.210384	0.180693	-0.117218
35	-0.492534	0.919038	-0.210384	-0.456726	-0.0996788
36	-0.492534	-1.28576	-0.210384	1.66801	-0.26486
38	-0.492534	-0.413357	-0.210384	-0.244253	-0.374161
41	-0.492534	-0.365771	-0.210384	-0.403608	-0.389096
43	2.01296	0.252841	-0.210384	0.711876	0.923412
44	-0.492534	-0.619561	-0.210384	0.711876	-0.266152
45	2.01296	-0.0802582	-0.210384	0.0744564	0.742233
46	-0.492534	-0.587837	-0.210384	0.127575	-0.354033
54	-0.492534	0.459045	-0.210384	-1.14726	-0.318955
56	-0.492534	-0.841627	-0.210384	-0.562963	-0.52547
58	-0.492534	0.268702	-0.210384	-0.881673	-0.319823
66	-0.492534	-1.4761	-0.210384	-0.775436	-0.707301
67	2.01296	-0.889212	-0.210384	0.552521	0.632481
68	2.01296	-0.889212	-0.210384	0.552521	0.632481
69	-0.492534	-2.30092	-0.210384	-1.09415	-0.950608
70	-0.492534	-0.841627	-0.210384	-1.09415	-0.612053
71	-0.492534	-1.38093	-0.210384	-0.35049	-0.615955
72	-0.492534	-1.46024	-0.210384	0.605639	-0.478506
75	-0.492534	-1.77748	-0.210384	-0.403608	-0.716612
76	-0.492534	0.0624984	-0.210384	-1.14726	-0.410954
78	-0.492534	-0.603699	-0.210384	-0.509845	-0.461612
79	-0.492534	-0.159567	-0.210384	-0.562963	-0.367232
82	-0.492534	0.919038	-0.210384	-0.6692	-0.134312
83	-0.492534	-0.2706	-0.210384	-0.456726	-0.375675
85	-0.492534	0.236979	-0.210384	-2.63458	-0.612906
86	-0.492534	-0.77818	-0.210384	3.1022	0.0866715
87	-0.492534	-1.77748	-0.210384	2.83661	-0.188457
94	-0.492534	0.538354	-0.210384	-0.987909	-0.27458
95	-0.492534	-2.12644	-0.210384	-0.244253	-0.771596
99	-0.492534	-1.11128	-0.210384	-0.0317802	-0.501446
103	-0.492534	1.09352	-0.210384	-0.509845	-0.0678577
105	-0.492534	-0.318186	-0.210384	-0.6692	-0.421348
109	-0.492534	-0.825765	-0.210384	-0.244253	-0.46984
110	-0.492534	-0.730594	-0.210384	-0.0317802	-0.413127
111	-0.492534	0.221117	-0.210384	-0.828554	-0.322205
113	2.01296	-0.476804	-0.210384	-0.562963	0.546335
115	-0.492534	-1.28576	-0.210384	-0.403608	-0.602533
116	-0.492534	1.45834	-0.210384	0.127575	0.12068
117	-0.492534	0.601801	-0.210384	-0.509845	-0.181936
118	-0.492534	-1.85679	-0.210384	-1.20038	-0.864886
121	-0.492534	-0.571976	-0.210384	0.340048	-0.31572
124	-0.492534	-0.968522	-0.210384	-0.0848985	-0.476985
127	-0.492534	2.07695	-0.210384	-0.6692	0.134324
129	-0.492534	-1.31748	-0.210384	-0.297372	-0.592577
130	-0.492534	-0.0168108	-0.210384	0.711876	-0.126314
131	-0.492534	-0.651285	-0.210384	0.233811	-0.351436
133	2.01296	0.9349	-0.210384	0.605639	1.06433
140	2.01296	0.919038	-0.210384	-1.57221	0.705664
141	-0.492534	0.268702	-0.210384	-1.04103	-0.345798
142	-0.492534	1.25214	-0.210384	-0.297372	0.00357492
143	-0.492534	-0.0326727	-0.210384	-0.562963	-0.337792
145	-0.492534	-0.127844	-0.210384	-0.138017	-0.290606
146	-0.492534	1.03007	-0.210384	0.28693	0.0472967
149	-0.492534	-1.33334	-0.210384	-0.0317802	-0.552965
151	-0.492534	-0.984384	-0.210384	-0.6692	-0.575906
157	-0.492534	-0.0326727	-0.210384	-0.722318	-0.363767
159	-0.492534	1.45834	-0.210384	-1.41286	-0.13041
161	-0.492534	-1.4761	-0.210384	-0.509845	-0.664009
162	-0.492534	1.09352	-0.210384	-0.509845	-0.0678577
163	-0.492534	-0.0326727	-0.210384	0.393166	-0.181943
No.	B03[O-O]	ETA_Psi_1	B02[O-S]	X3A	ARKA_1
1	-0.492534	1.18869	-0.210384	8.67962	1.4521
10	-0.492534	0.808005	-0.210384	0.0213381	-0.047514
114	-0.492534	0.538354	4.71259	3.63338	1.51744
125	-0.492534	0.728696	-0.210384	1.45553	0.16786
21	-0.492534	0.9349	-0.210384	-0.0848985	-0.0353909
29	-0.492534	-0.286462	-0.210384	0.0213381	-0.30143
37	-0.492534	1.58524	-0.210384	-0.456726	0.054879
40	-0.492534	0.9349	4.71259	-0.0317802	1.01202
53	-0.492534	1.50593	-0.210384	3.6865	0.711825
55	-0.492534	-0.825765	-0.210384	-0.297372	-0.478498
57	-0.492534	2.2673	4.71259	1.72112	1.60685
61	-0.492534	1.268	-0.210384	-0.0317802	0.0505463
62	-0.492534	1.64868	-0.210384	-0.244253	0.104232
77	2.01296	-1.42852	-0.210384	0.711876	0.533337
8	2.01296	0.0624984	-0.210384	-0.881673	0.619504
91	-0.492534	1.17283	-0.210384	-0.6692	-0.0754328
98	-0.492534	1.96592	-0.210384	1.61489	0.480871
102	-0.492534	0.855591	-0.210384	-0.138017	-0.062449
107	-0.492534	-0.857489	-0.210384	-0.297372	-0.485858
119	-0.492534	-0.381633	-0.210384	-0.881673	-0.470701
122	-0.492534	0.601801	-0.210384	-1.09415	-0.277177
123	-0.492534	0.395597	-0.210384	0.0744564	-0.134534
134	-0.492534	-1.63472	-0.210384	-1.2535	-0.822025
135	-0.492534	0.459045	-0.210384	-0.881673	-0.275664
14	-0.492534	-1.39679	-0.210384	0.28693	-0.515735
147	-0.492534	1.28386	-0.210384	-0.191135	0.0282514
152	-0.492534	0.0307747	-0.210384	0.0213381	-0.227831
153	-0.492534	-0.207153	-0.210384	-0.934791	-0.43888
154	-0.492534	0.9349	-0.210384	-0.828554	-0.156607
156	-0.492534	-0.587837	-0.210384	-0.244253	-0.414641
160	-0.492534	-1.72989	-0.210384	-0.934791	-0.792155
164	-0.492534	0.665249	-0.210384	0.711876	0.0319242
18	2.01296	-0.794041	-0.210384	-2.52834	0.15238
19	-0.492534	-1.07955	-0.210384	-0.775436	-0.615302
34	-0.492534	1.01421	-0.210384	-0.722318	-0.120891
47	-0.492534	-1.19059	-0.210384	-0.297372	-0.563137
48	-0.492534	-0.254739	-0.210384	-0.191135	-0.328704
49	2.01296	0.570078	-0.210384	-0.138017	0.858478
63	-0.492534	0.728696	-0.210384	0.340048	-0.013964
64	2.01296	-0.0168108	-0.210384	-0.0317802	0.739637
65	-0.492534	1.9342	-0.210384	-0.0848985	0.196446
73	-0.492534	-1.58713	-0.210384	-0.35049	-0.663794
80	-0.492534	0.427321	-0.210384	-1.09415	-0.317657
81	-0.492534	0.0466365	-0.210384	1.18994	-0.0336693
84	-0.492534	0.236979	-0.210384	-2.63458	-0.612906
92	-0.492534	0.205255	-0.210384	-0.191135	-0.221985

## Sheet: ARKA_2
No.	B09[C-C]	MLOGP2	ETA_Beta	MLOGP	ARKA_2
4	-1.25949	-0.47196	-0.930154	-0.0972276	-0.894402
5	-1.25949	0.140303	-0.648548	0.388272	-0.655306
11	-1.25949	-0.416155	0.170671	-0.0463538	-0.66109
20	0.787184	0.177892	1.88591	0.414023	0.832613
23	0.787184	-0.538896	0.0938688	-0.160035	0.265402
30	0.787184	-1.09347	-0.622947	-0.875408	-0.0744661
33	-1.25949	-0.637639	-2.23578	-2.89277	-1.5171
39	-1.25949	-1.26768	-1.90298	-1.45135	-1.41013
42	-1.25949	-0.0104858	-1.05816	0.280871	-0.779433
50	0.787184	-0.0594957	0.401076	0.244443	0.472504
51	-1.25949	-0.62217	-0.469344	-0.24294	-0.852366
52	-1.25949	-1.02249	0.554679	-0.748538	-0.794289
59	-1.25949	-0.652096	-1.28856	-0.273716	-1.02276
60	0.787184	0.263912	1.3995	0.472433	0.761948
74	-1.25949	-0.884279	-0.392542	-0.545671	-0.927332
88	-1.25949	-1.27245	-1.90298	-1.62281	-1.43152
89	-1.25949	0.151435	-0.0853353	0.395809	-0.541726
90	-1.25949	-1.11212	-0.341341	-0.912464	-1.00788
93	0.787184	0.613632	0.810685	0.693514	0.744892
96	0.787184	-1.23848	-0.981355	-1.26732	-0.221223
97	0.787184	-0.232693	0.170671	0.109408	0.375597
100	-1.25949	-0.747658	-0.443743	-0.377976	-0.889268
101	-1.25949	-0.717732	-0.648548	-0.344688	-0.919284
104	-1.25949	-1.27289	-1.74937	-1.53991	-1.39164
106	-1.25949	-0.903796	-1.36536	-0.571422	-1.12509
108	0.787184	0.116448	-0.213338	0.371942	0.403496
112	-1.25949	-1.24238	-1.28856	-1.86651	-1.3339
120	0.787184	-0.877195	-0.238939	-0.53625	0.0857131
126	0.787184	0.26796	-0.187738	0.474946	0.451983
128	0.787184	0.105316	-0.930154	0.363777	0.259735
132	-1.25949	-0.366567	-0.418143	-0.00301689	-0.761125
136	-1.25949	-0.732912	-0.72535	-0.361646	-0.939482
137	0.787184	-0.172262	0.887487	0.157769	0.534297
138	0.787184	0.225311	1.01549	0.446682	0.675666
139	0.787184	-0.199731	1.3227	0.135787	0.611324
144	-1.25949	-0.857822	-0.264539	-0.511127	-0.892683
148	0.787184	0.448097	0.0682682	0.591767	0.55317
150	-1.25949	1.37654	0.119469	1.11307	-0.16386
155	-1.25949	0.0378013	-1.41657	0.316043	-0.835548
158	-1.25949	-1.23877	-1.72377	-1.26858	-1.3473
2	-1.25949	-0.147829	-0.674148	0.176612	-0.744867
3	-1.25949	-1.1341	-1.85177	-0.95957	-1.31406
7	0.787184	-0.582991	0.14507	-0.203372	0.261197
9	0.787184	3.31265	0.170671	1.96159	1.32635
12	0.787184	1.14783	1.80911	0.994361	1.08643
13	0.787184	1.71035	-0.418143	1.27762	0.799475
15	-1.25949	-1.18036	-0.955755	-1.07199	-1.16135
16	0.787184	-0.216935	1.09229	0.121969	0.560976
17	-1.25949	-1.26364	-0.674148	-1.73775	-1.20253
22	0.787184	0.100546	0.0938688	0.360637	0.459087
24	0.787184	0.176301	0.60588	0.413395	0.581326
25	0.787184	1.14407	0.708283	0.992477	0.869667
26	-1.25949	1.22907	-0.0853353	1.03707	-0.243423
27	0.787184	-0.315388	-0.341341	0.0409481	0.250061
28	0.787184	-0.00831722	-0.392542	0.282128	0.331983
31	0.787184	0.151579	1.4507	0.395809	0.739725
32	-1.25949	-0.722648	-0.622947	-0.349712	-0.915876
35	0.787184	-0.510127	-0.904554	-0.1324	0.0789268
36	0.787184	-1.02437	-0.827752	-2.39974	-0.281767
38	-1.25949	-1.0582	-0.981355	-0.809461	-1.10996
41	-1.25949	-0.279101	-0.930154	0.0710956	-0.834642
43	0.787184	0.663798	0.324274	0.723034	0.663402
44	-1.25949	-0.691565	-0.827752	-0.315797	-0.945579
45	0.787184	-0.769489	-0.546146	-0.403098	0.063533
46	0.787184	0.505925	0.426676	0.627567	0.639591
54	0.787184	1.52024	0.733883	1.18529	0.975122
56	-1.25949	-1.26855	-0.904554	-1.46266	-1.21597
58	0.787184	2.30917	0.503478	1.55083	1.13598
66	0.787184	-0.307148	1.06669	0.0478569	0.528555
67	0.787184	0.886005	0.554679	0.851788	0.769658
68	0.787184	0.886005	0.554679	0.851788	0.769658
69	0.787184	0.370461	1.3227	0.542149	0.77714
70	0.787184	2.23038	1.6555	1.51629	1.34144
71	0.787184	1.6732	1.96271	1.25941	1.2563
72	-1.25949	-0.355579	-0.802151	0.00703225	-0.832932
75	0.787184	-1.07497	1.4507	-0.840236	0.339966
76	0.787184	2.12253	1.3227	1.46855	1.24831
78	0.787184	1.25163	0.247472	1.049	0.808232
79	-1.25949	1.08797	0.60588	0.962329	-0.145906
82	-1.25949	-0.795801	-0.264539	-0.434502	-0.870788
83	0.787184	1.29775	1.16909	1.07287	1.00121
85	-1.25949	-0.218236	-0.571746	0.120713	-0.745952
86	-1.25949	-0.0184373	-1.72377	-3.42601	-1.35265
87	-1.25949	-0.718166	-1.72377	-2.80673	-1.4231
94	-1.25949	-0.556245	-1.05816	-0.176993	-0.946345
95	0.787184	1.42193	1.3227	1.1363	1.06445
99	0.787184	1.63214	2.19312	1.23994	1.29069
103	0.787184	1.33895	-0.0853353	1.09422	0.766371
105	0.787184	-0.067158	1.19469	0.238163	0.625728
109	0.787184	-1.25091	1.24589	-1.32825	0.205507
110	0.787184	-0.772525	1.3227	-0.406867	0.428752
111	0.787184	1.07409	-0.162137	0.95542	0.68024
113	0.787184	-1.17111	1.06669	-1.0475	0.220231
115	0.787184	0.565923	0.58028	0.664623	0.686466
116	0.787184	1.03997	0.273073	0.936578	0.756271
117	0.787184	1.05038	0.119469	0.942231	0.728981
118	0.787184	-0.175876	1.5787	0.154629	0.668657
121	-1.25949	-1.09232	-0.827752	-0.872896	-1.09443
124	-1.25949	-1.24571	-1.16056	-1.85018	-1.30755
127	0.787184	0.90986	-0.469344	0.864978	0.575433
129	0.787184	-0.185707	0.964288	0.147092	0.54531
130	0.787184	-1.23501	-0.520545	-1.25288	-0.128471
131	0.787184	1.64255	0.887487	1.24496	1.03752
133	0.787184	0.574597	0.861886	0.669648	0.744046
140	0.787184	1.28271	0.0426676	1.06533	0.776437
141	0.787184	-0.566221	0.14507	-0.186414	0.26667
142	0.787184	0.287766	-1.36536	0.488135	0.226818
143	0.787184	-0.987937	-0.0341341	-0.693268	0.0843568
145	0.787184	2.07207	1.98831	1.44532	1.36561
146	0.787184	1.05515	-0.187738	0.944743	0.670051
149	0.787184	1.02711	0.810685	0.929669	0.85817
151	0.787184	-1.16272	0.426676	-1.02615	0.0990569
157	-1.25949	-0.565931	0.221872	-0.186414	-0.698576
159	-1.25949	-0.445358	-0.546146	-0.0727328	-0.810741
161	0.787184	-0.399384	1.5787	-0.0312801	0.600491
162	0.787184	1.23862	0.0682682	1.04209	0.769606
163	0.787184	-0.511572	0.14507	-0.134284	0.284131
No.	B09[C-C]	MLOGP2	ETA_Beta	MLOGP	ARKA_2
1	-1.25949	-0.647036	-2.26138	-0.268691	-1.21179
10	-1.25949	0.190758	-0.75095	0.422816	-0.660873
114	-1.25949	-1.27318	-1.57017	-1.55812	-1.35874
125	-1.25949	0.0941843	-0.955755	0.35624	-0.728831
21	0.787184	0.647317	0.375475	0.713613	0.668921
29	-1.25949	-1.11343	-0.597347	-0.914977	-1.05863
37	0.787184	0.0625231	-0.264539	0.333629	0.377793
40	0.787184	-0.417311	-0.597347	-0.04761	0.168349
53	0.787184	1.04822	-1.64697	0.940975	0.382163
55	0.787184	-0.897724	1.22029	-0.563257	0.36428
57	-1.25949	-0.659759	-1.77497	-0.281881	-1.12065
61	0.787184	0.756324	-0.648548	0.777676	0.498292
62	0.787184	2.13944	0.452277	1.47609	1.08209
77	-1.25949	-1.03015	-0.622947	-0.761099	-1.02818
8	0.787184	-0.832233	2.19312	-0.478467	0.578534
91	0.787184	1.63243	-0.0341341	1.23994	0.854204
98	-1.25949	-0.613929	-2.15898	-2.91727	-1.50008
102	-1.25949	-0.276354	-0.110936	0.0736078	-0.673211
107	0.787184	-0.871701	1.01549	-0.528713	0.33361
119	0.787184	0.448097	0.0682682	0.591767	0.55317
122	0.787184	1.03188	0.247472	0.932182	0.749062
123	0.787184	0.371184	0.401076	0.542777	0.596726
134	0.787184	-0.349218	1.4251	0.0120568	0.585876
135	-1.25949	-0.376687	-0.494944	-0.0118099	-0.77931
14	0.787184	-1.26552	0.324274	-1.43	0.00975304
147	0.787184	2.00311	0.375475	1.41454	1.03163
152	-1.25949	-0.0973736	-0.597347	0.215552	-0.714786
153	0.787184	-0.630555	0.682682	-0.251733	0.351016
154	0.787184	-0.191056	-0.187738	0.142696	0.317888
156	0.787184	-0.746936	0.913087	-0.377348	0.357253
160	-1.25949	0.100546	0.0938688	0.360637	-0.521271
164	0.787184	0.726253	-0.443743	0.76009	0.530146
18	0.787184	-1.26812	1.86031	-1.457	0.307066
19	0.787184	-0.985479	1.6043	-0.689499	0.406445
34	0.787184	1.36873	0.631481	1.1093	0.914796
47	0.787184	1.32594	1.3739	1.08732	1.04888
48	-1.25949	-0.870978	-0.597347	-0.528085	-0.962641
49	0.787184	-0.272595	0.785084	0.0767482	0.483916
63	0.787184	0.43523	-0.520545	0.583602	0.43414
64	0.787184	0.471084	0.861886	0.606213	0.715173
65	0.787184	0.843501	-0.75095	0.827922	0.502159
73	0.787184	1.19279	0.452277	1.01823	0.83259
80	-1.25949	-0.316256	-0.699749	0.04032	-0.800799
81	-1.25949	-0.944421	-0.571746	-0.628576	-0.984711
84	-1.25949	-0.146528	-0.674148	0.177868	-0.744449
92	0.787184	-0.295582	0.298673	0.057906	0.381602
