# Supplementary material for: ARKA: a framework of dimensionality reduction for machine-learning classification modeling, risk assessment, and data gap-filling of sparse environmental toxicity data
Source: Royal Society of Chemistry journal article supplement (doi:10.1039/d4em00173g), 2024-01-01
Supplement: d4em00173g3.pdf [file d4em00173g3.pdf]

**ARKA: A framework of dimensionality reduction  
for machine-learning classification modeling, risk  
assessment, and data gap-filling of sparse  
environmental toxicity data**

**Arkaprava Banerjee, Kunal Roy\***

*Drug Theoretics and Cheminformatics Laboratory, Department of Pharmaceutical  
Technology, Jadavpur University, Kolkata 700 032, India*

**Supplementary Materials SI-3**

**\*Correspondence to: Kunal Roy ([kunal.roy@jadavpuruniversity.in](mailto:kunal.roy@jadavpuruniversity.in))**

**Table S1.** List of QSAR descriptors involved in the computation of the ARKA descriptors

| <i>Datasets</i>  | <i>ARKA_1</i>                      | <i>ARKA_2</i>                                                                                         |
|------------------|------------------------------------|-------------------------------------------------------------------------------------------------------|
| <i>Dataset 1</i> | gmin, minsssCH                     | B06[C-N], B04[N-O], B10[C-O], B09[C-C], B05[N-O], MaxaaN, Eta_B, nR05, gmax, C-040, SAscore, B03[O-O] |
| <i>Dataset 2</i> | B03[O-O], ETA_Psi_1, B02[O-S], X3A | B09[C-C], MLOGP2, ETA_Beta, MLOGP                                                                     |
| <i>Dataset 3</i> | ETA_EtaP_B_RC, nCrs, S_tsc         | nAB, nRCONHR, Jurs-DPSA-1                                                                             |
| <i>Dataset 4</i> | MW, Saaac, 2χv, Atype_C_24         |                                                                                                       |
| <i>Dataset 5</i> | MAXDP                              | WAP, nRNNOx, Cl-086                                                                                   |

**Table S2.** LDA Coefficient values of QSAR and ARKA models (Datasets 1-5)

| <i>Dataset</i> | <i>Descriptor types</i> | <i>Models</i>                                                                                                                                                           |
|----------------|-------------------------|-------------------------------------------------------------------------------------------------------------------------------------------------------------------------|
| <b>1</b>       | <b>QSAR</b>             | $df = -0.214 \times nR05 - 0.047 \times B06[C-N] - 0.271 \times MaxaaN + 0.246 \times B04[N-O] + 0.307 \times B05[N-O] - 0.134 \times B10[C-O] - 0.129 \times B09[C-C]$ |
|                | <b>ARKA</b>             | $df = 0.322 \times ARKA_1 - 0.530 \times ARKA_2$                                                                                                                        |
| <b>2</b>       | <b>QSAR</b>             | $df = 1.941 \times X3A + 1.391 \times ETA_{Psi_1} + 1.391 \times B02[O-S] - 1.853 \times B09[C-C]$                                                                      |
|                | <b>ARKA</b>             | $df = 1.724 \times ARKA_1 - 1.097 \times ARKA_2$                                                                                                                        |
| <b>3</b>       | <b>QSAR</b>             | $df = -2.380 \times ETA_{EtaP_{B_{RC}}} - 2.0 \times S_{tsc} - 3.456 \times Jurs - DPSA - 1$                                                                            |
|                | <b>ARKA</b>             | $df = 1.101 \times ARKA_1 - 2.480 \times ARKA_2$                                                                                                                        |

|          |             |                                                                                          |
|----------|-------------|------------------------------------------------------------------------------------------|
| <b>4</b> | <b>QSAR</b> | $df = 5.339 \times MW - 2.539 \times SaaaC - 2.704 \times 2_{\chi V} + 2.989 \times Aty$ |
|          | <b>ARKA</b> | $df = 1.844 \times ARKA_1$                                                               |
| <b>5</b> | <b>QSAR</b> | $df = -0.664 \times Wap + 0.895 \times MAXDP - 1.472 \times nRNNO_X - 0.7$               |
|          | <b>ARKA</b> | $df = 0.895 \times ARKA_1 - 1.553 \times ARKA_2$                                         |

**Table S3.** Optimized hyperparameter\* settings for the different ML models developed

| <b>Models</b>   | <b>Dataset 1</b>                        | <b>Dataset 2</b>                         | <b>Dataset 3</b>                           | <b>Dataset 4</b>                   | <b>Dataset 5</b>                        |
|-----------------|-----------------------------------------|------------------------------------------|--------------------------------------------|------------------------------------|-----------------------------------------|
| <b>SVM_QSAR</b> | C: 10, gamma:<br>scale, kernel:<br>poly | C: 1, gamma:<br>scale, kernel:<br>linear | C: 0.1, gamma:<br>scale, kernel:<br>linear | C: 1, gamma:<br>scale, kernel: rbf | C: 10, gamma:<br>scale, kernel:<br>poly |
| <b>SVM_ARKA</b> | C: 0.1, gamma:<br>scale, kernel: rbf    | C: 1, gamma:<br>scale, kernel: rbf       | C: 0.1, gamma:<br>scale, kernel:           | C: 1, gamma:<br>scale, kernel:     | C: 10, gamma:<br>scale, kernel:         |

|                       |                                                                                                                                            |                                                                                                                                      |                                                                                                                                      |                                                                                                                                  |                                                                                                                                      |
|-----------------------|--------------------------------------------------------------------------------------------------------------------------------------------|--------------------------------------------------------------------------------------------------------------------------------------|--------------------------------------------------------------------------------------------------------------------------------------|----------------------------------------------------------------------------------------------------------------------------------|--------------------------------------------------------------------------------------------------------------------------------------|
|                       |                                                                                                                                            |                                                                                                                                      | linear                                                                                                                               | linear                                                                                                                           | linear                                                                                                                               |
| <b><i>RF_QSAR</i></b> | 'criterion':<br>'entropy',<br>'max_depth':<br>None,<br>'min_samples_1<br>eaf': 1,<br>'min_samples_s<br>plit': 2,<br>'n_estimators':<br>500 | 'criterion': 'gini',<br>'max_depth': 3,<br>'min_samples_le<br>af': 5,<br>'min_samples_sp<br>lit': 2,<br>'n_estimators':<br>500       | 'criterion':<br>'entropy',<br>'max_depth': 3,<br>'min_samples_1<br>eaf': 1,<br>'min_samples_s<br>plit': 2,<br>'n_estimators':<br>500 | 'criterion': 'gini',<br>'max_depth':<br>None,<br>'min_samples_le<br>af': 5,<br>'min_samples_sp<br>lit': 2,<br>'n_estimators': 50 | 'criterion': 'gini',<br>'max_depth': 2,<br>'min_samples_1<br>eaf': 1,<br>'min_samples_s<br>plit': 2,<br>'n_estimators':<br>500       |
| <b><i>RF_ARKA</i></b> | 'criterion':<br>'entropy',<br>'max_depth':<br>None,<br>'min_samples_1<br>eaf': 1,<br>'min_samples_s<br>plit': 3,<br>'n_estimators':<br>100 | 'criterion': 'gini',<br>'max_depth':<br>None,<br>'min_samples_le<br>af': 1,<br>'min_samples_sp<br>lit': 3,<br>'n_estimators':<br>100 | 'criterion':<br>'entropy',<br>'max_depth': 2,<br>'min_samples_1<br>eaf': 1,<br>'min_samples_s<br>plit': 2,<br>'n_estimators':<br>50  | 'criterion': 'gini',<br>'max_depth': 1,<br>'min_samples_le<br>af': 1,<br>'min_samples_sp<br>lit': 2,<br>'n_estimators':<br>500   | 'criterion':<br>'entropy',<br>'max_depth': 2,<br>'min_samples_1<br>eaf': 1,<br>'min_samples_s<br>plit': 2,<br>'n_estimators':<br>100 |
| <b><i>LR_QSAR</i></b> | 'C': 0.1,<br>'penalty': 'l1',<br>'solver':<br>'liblinear'                                                                                  | 'C': 0.1, 'penalty':<br>None, 'solver':<br>'lbfgs'                                                                                   | 'C': 1.0,<br>'penalty': 'l2',<br>'solver': 'lbfgs'                                                                                   | 'C': 0.1, 'penalty':<br>None, 'solver':<br>'saga'                                                                                | 'C': 10.0,<br>'penalty': 'l1',<br>'solver':<br>'liblinear'                                                                           |
| <b><i>LR_ARKA</i></b> | 'C': 0.1,<br>'penalty': 'l2',<br>'solver': 'lbfgs'                                                                                         | 'C': 0.1, 'penalty':<br>None, 'solver':<br>'lbfgs'                                                                                   | 'C': 0.1,<br>'penalty': 'l2',<br>'solver':<br>'liblinear'                                                                            | 'C': 0.1, 'penalty':<br>'l2', 'solver':<br>'liblinear'                                                                           | 'C': 0.1,<br>'penalty': 'l2',<br>'solver': 'lbfgs'                                                                                   |

\*As per Scikit learn (J. Mach. Learn. Res. 12, 2825-2830).

**Table S4.** Results of 20-times 5-fold cross-validation of all the developed ML models.

| <i>Desc</i> | <i>Models</i> | <i>Dataset1</i> |               | <i>Dataset2</i> |               | <i>Dataset3</i> |               | <i>Dataset4</i> |               | <i>Dataset5</i> |               |
|-------------|---------------|-----------------|---------------|-----------------|---------------|-----------------|---------------|-----------------|---------------|-----------------|---------------|
|             |               | <i>Acc.</i>     | <i>Acc.CV</i> |
| <i>QSAR</i> | <i>LDA</i>    | 0.662           | 0.621         | 0.863           | 0.821         | 0.887           | 0.876         | 0.905           | 0.896         | 0.741           | 0.702         |
|             | <i>SVM</i>    | 0.874           | 0.755         | 0.863           | 0.833         | 0.887           | 0.868         | 0.878           | 0.857         | 0.759           | 0.713         |
|             | <i>RF</i>     | 1.000           | 0.849         | 0.880           | 0.787         | 0.897           | 0.811         | 0.905           | 0.835         | 0.833           | 0.672         |
|             | <i>LR</i>     | 0.684           | 0.635         | 0.872           | 0.821         | 0.897           | 0.869         | 0.892           | 0.877         | 0.778           | 0.688         |
| <i>ARKA</i> | <i>LDA</i>    | 0.651           | 0.645         | 0.812           | 0.798         | 0.825           | 0.809         | 0.851           | 0.838         | 0.722           | 0.702         |
|             | <i>SVM</i>    | 0.665           | 0.662         | 0.821           | 0.785         | 0.825           | 0.822         | 0.851           | 0.851         | 0.741           | 0.724         |
|             | <i>RF</i>     | 0.996           | 0.822         | 1.000           | 0.811         | 0.835           | 0.755         | 0.892           | 0.855         | 0.833           | 0.724         |
|             | <i>LR</i>     | 0.658           | 0.651         | 0.829           | 0.802         | 0.825           | 0.812         | 0.851           | 0.837         | 0.741           | 0.665         |

**Table S5.** Accuracy values (training and test sets) of ARKA models for the five data sets

| Modeling algorithm | Data set 1   |       | Data set 2 |       | Data set 3 |       | Data set 4   |       | Data set 5 |       |
|--------------------|--------------|-------|------------|-------|------------|-------|--------------|-------|------------|-------|
|                    | Trainin<br>g | Test  | Training   | Test  | Training   | Test  | Trainin<br>g | Test  | Training   | Test  |
| LDA                | 0.651        | 0.678 | 0.812      | 0.761 | 0.825      | 0.489 | 0.851        | 0.806 | 0.722      | 0.688 |
| SVM                | 0.665        | 0.678 | 0.821      | 0.783 | 0.825      | 0.489 | 0.851        | 0.839 | 0.741      | 0.875 |
| RF                 | 0.996        | 0.624 | 1          | 0.674 | 0.835      | 0.466 | 0.892        | 0.903 | 0.833      | 0.813 |
| LR                 | 0.658        | 0.683 | 0.829      | 0.761 | 0.825      | 0.477 | 0.851        | 0.807 | 0.741      | 0.813 |

**Table S6.** Analysis of the number of outliers using the leverage approach

| <i>Datasets</i> | <i>QSAR outliers</i> | <i>n<sub>Descriptors</sub></i><br><i>(QSAR)</i> | <i>ARKA outliers</i> | <i>n<sub>Descriptors</sub></i><br><i>(ARKA)</i> | <i>n<sub>TRAIN</sub></i> | <i>n<sub>TEST</sub></i> |
|-----------------|----------------------|-------------------------------------------------|----------------------|-------------------------------------------------|--------------------------|-------------------------|
|                 |                      |                                                 |                      |                                                 |                          |                         |

|   | <i>TRAIN</i> | <i>TEST</i> |    | <i>TRAIN</i> | <i>TEST</i> |   |     |     |
|---|--------------|-------------|----|--------------|-------------|---|-----|-----|
| 1 | 2            | 4           | 14 | 11           | 3           | 2 | 269 | 202 |
| 2 | 6            | 6           | 8  | 0            | 3           | 2 | 117 | 46  |
| 3 | 3            | 12          | 6  | 3            | 11          | 2 | 97  | 88  |
| 4 | 4            | 0           | 4  | 3            | 0           | 1 | 74  | 31  |
| 5 | 3            | 1           | 4  | 0            | 0           | 2 | 54  | 16  |

**n<sub>Descriptors</sub>** = The number of descriptors

**n<sub>TRAIN</sub>** = The number of data points in the training set

**n<sub>TEST</sub>** = The number of data points in the test set

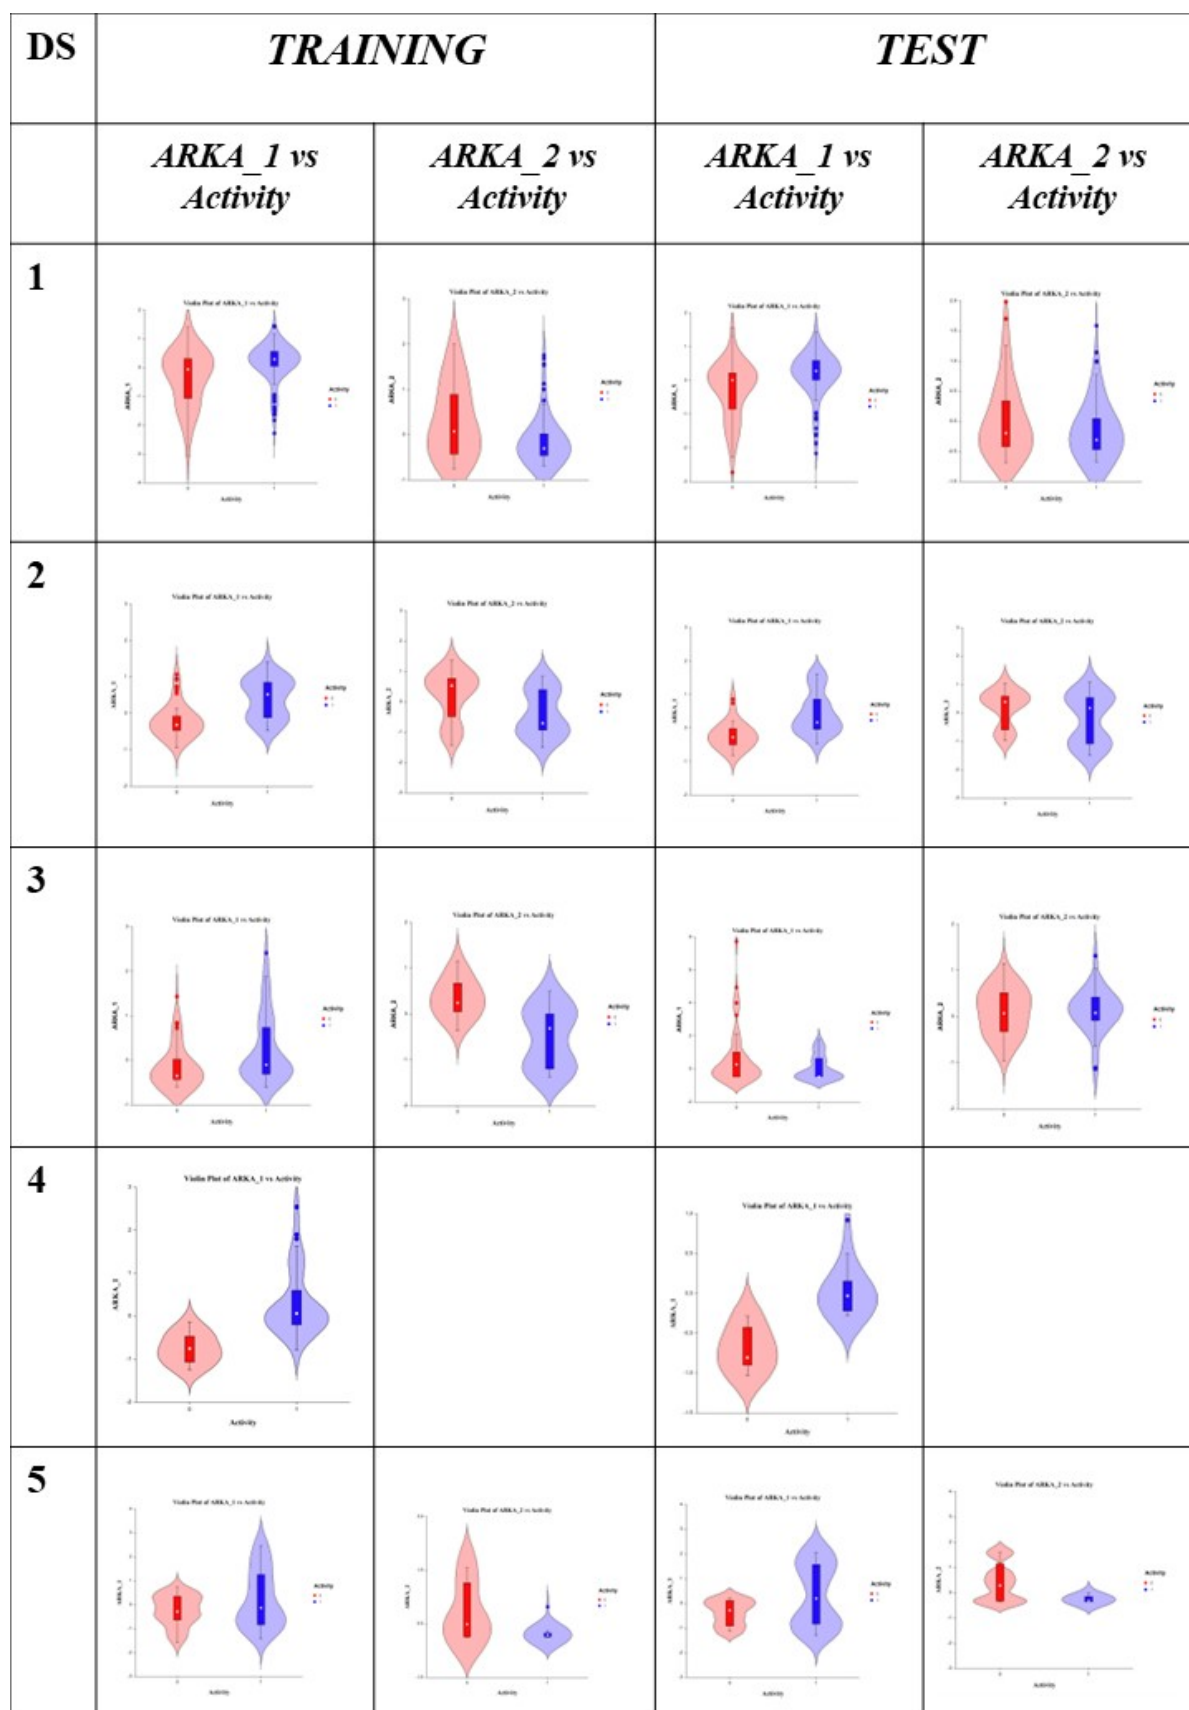

**Figure S1.** Violin Plots of ARKA\_1 vs Activity and ARKA\_2 vs Activity for all the five datasets (DS = Data set).

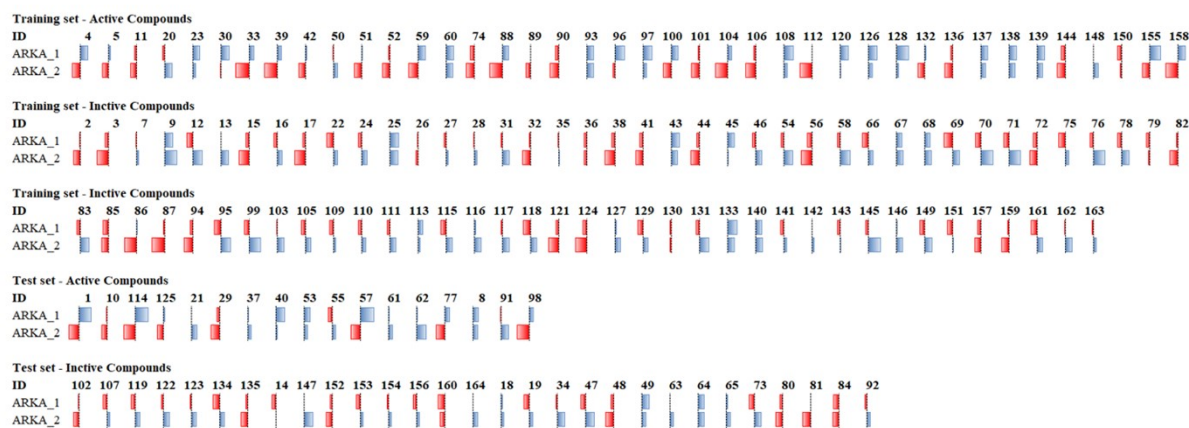

**Figure S2.** Analysis of the values of ARKA\_1 and ARKA\_2 for the active and inactive compounds in the training and test sets of a representative example (Dataset 2; blue indicates a positive value while red indicates a negative value).

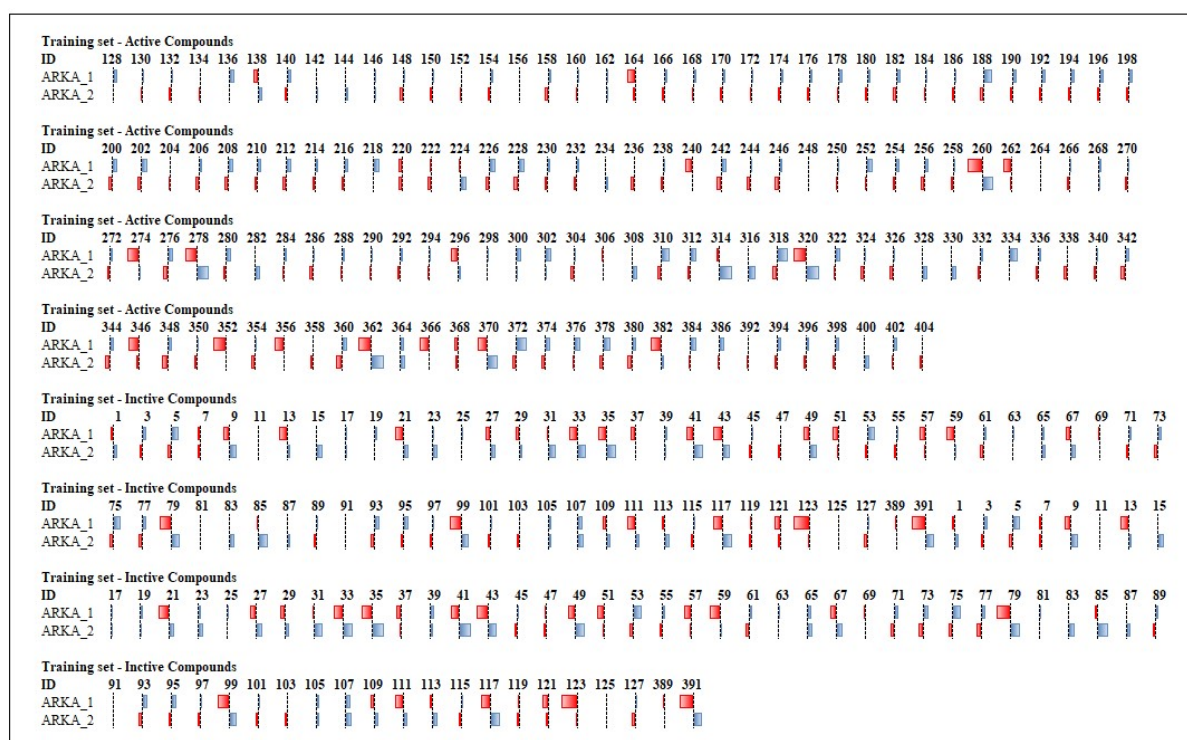

**Figure S3.** Data Bar Plots for the training set compounds demonstrating the variation of the ARKA\_1 and ARKA\_2 values (Dataset 1).



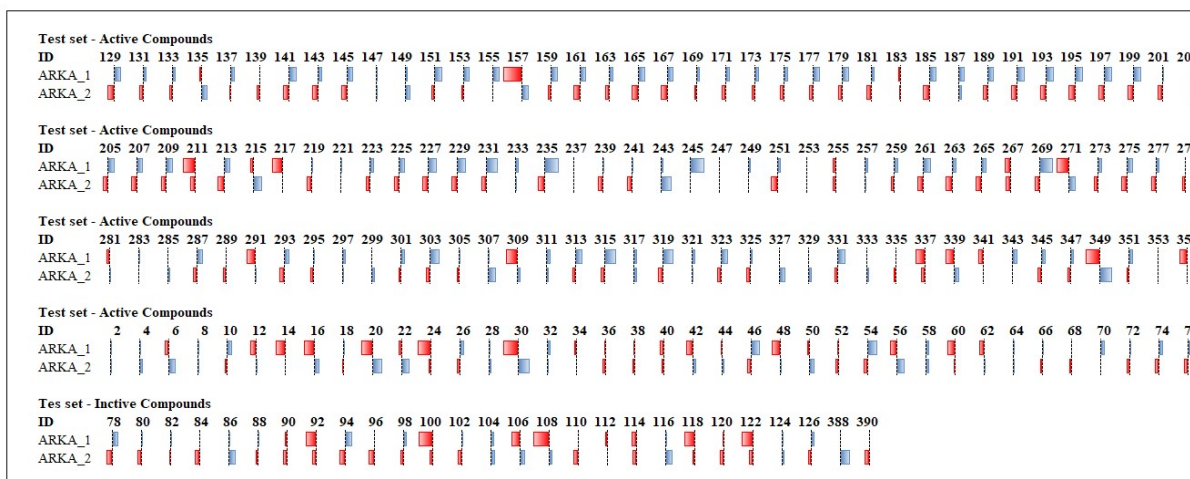

**Figure S4.** Data Bar Plots for the test set compounds demonstrating the variation of the ARKA\_1 and ARKA\_2 values (Dataset 1).

### Data set modelability

The data set modelability was studied using ARKA descriptors for Dataset 2 (**Figure S5**), showing similar results to Dataset 1 (**Figure 8** of the main manuscript). Thus, the ARKA descriptors may be used in detecting serious activity/prediction cliffs and understanding the modelability of a data set. This may be exercised even in case of regression modeling problems considering the whole data set response mean as the threshold and then classifying the response values as positives or negatives. For initial modelability analysis (when the contributing features are not known), one may proceed with computing the ARKA descriptors starting with the (whole) pretreated pool of descriptors while for the final model development, one should use only the selected features.

In the case of Dataset 3, the scatter plot of ARKA\_2 vs. ARKA\_1 for the training set (**Figure S6**) shows poor modelability of the data set (the negative data points in the fourth quadrant are near the Y-axis) while the plot for the test set (**Figure S6**) shows poor quality of projections in the fourth quadrant suggesting poor information content of the QSAR descriptors for predictions of the endpoint (consistent with the poor model performance as per **Figure 4**). This is evident just from the ARKA descriptor scatter plot even without performing any modeling.

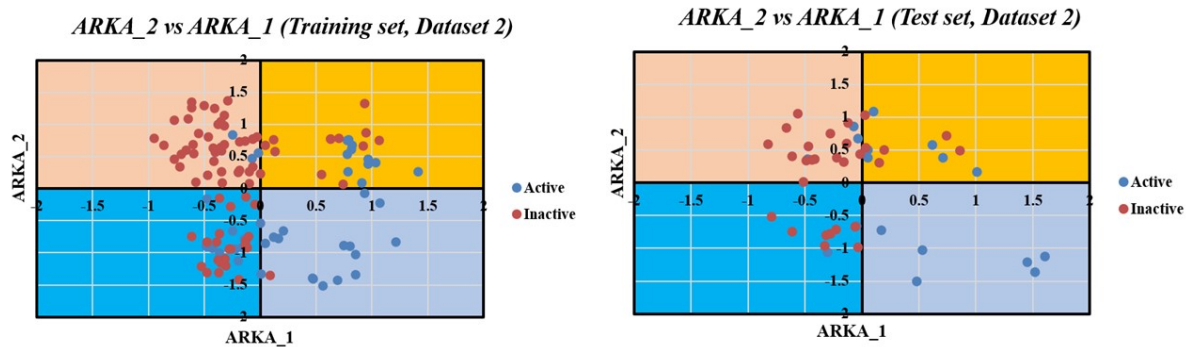

**Figure S5.** Scatter Plots of ARKA\_2 vs ARKA\_1 of Dataset 2.

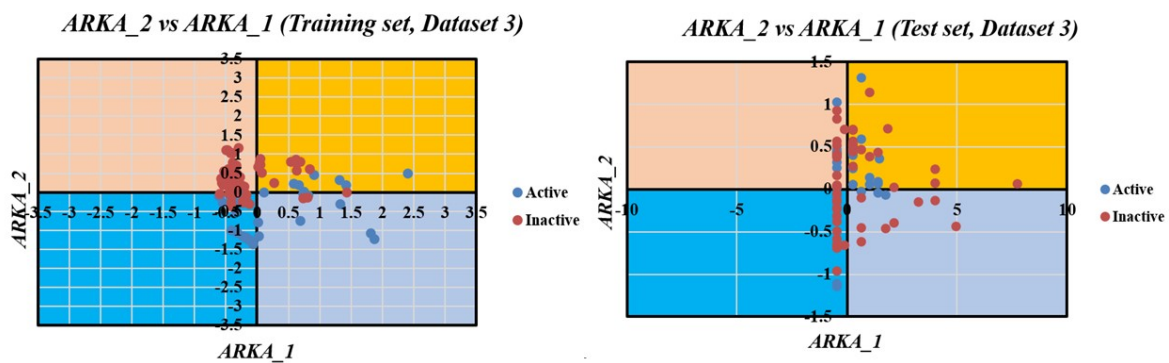

**Figure S6.** Scatter Plots of ARKA\_2 vs ARKA\_1 of Dataset 3.
